# Supplementary material for: An in situ ascorbate peroxidase labeling in secreted exosomes identifies a stress-induced exosome proteome alteration
Source: Research Square preprint supplement (doi:10.21203/rs.3.rs-428162/v1), 2021-05-13
Supplement: Supplementary file 1 [file 801598c6e4a2c5525c8401a0.xlsx]

## Sheet: Supp table S1
	Supplementary table S1. Indexing Peptide-to-spectrum matches (PSM) table from in vitro EPAL studies.
	Content
	S1A | Data from all in vitro EPAL studies.
	S1B | Commonly shared proteins from the Venn diagram analysis shown in Supplementary Figure S4a
	S1C | Differential analysis shown in Figure 4f.
	S1D | GO analysis shown in Figure 4g.

## Sheet: Supp table S1A
			Control						APEX
			No Oxidative Stress			Oxidative Stress			No Oxidative Stress			Oxidative stress
Accession ID	Gene symbol	Description	S1.1	S1.2	S1.3	S2.1	S2.2	S2.3	S3.1	S3.2	S3.3	S4.1	S4.2	S4.3
A0A068BGT0	Vps52	Vacuolar protein sorting-associated protein 52 homolog	NA	NA	NA	NA	NA	NA	2	NA	1	NA	2	2
A0A068BIT8	Psmb8	Proteasome subunit beta	NA	NA	NA	NA	NA	NA	NA	4	NA	NA	NA	NA
A0A075B5U0	Ighv1-12	Immunoglobulin heavy variable V1-12	NA	NA	NA	NA	NA	NA	NA	NA	1	NA	NA	NA
A0A076N9U7	Celsr3	Celsr3	NA	NA	NA	NA	NA	NA	NA	NA	1	NA	NA	NA
A0A087WNV6	Xrn1	5'-3' exoribonuclease 1	NA	NA	NA	NA	NA	NA	NA	NA	4	NA	NA	1
A0A087WP48	Ktn1	Kinectin	NA	NA	NA	NA	NA	NA	NA	1	NA	NA	NA	NA
A0A087WP65	R3hdm1	R3H domain-containing 1 (Fragment)	NA	NA	NA	NA	NA	NA	NA	NA	NA	1	NA	NA
A0A087WPD9	1700057G04Rik	Phospholipid scramblase	NA	NA	NA	NA	NA	NA	NA	2	NA	NA	NA	NA
A0A087WPL5	Dhx9	RNA helicase	NA	NA	NA	NA	NA	NA	2	NA	4	NA	NA	NA
A0A087WPT4	Idh1	Isocitrate dehydrogenase [NADP] cytoplasmic (Fragment)	NA	NA	NA	NA	NA	NA	NA	2	NA	NA	NA	NA
A0A087WQA8	Cops5	COP9 signalosome complex subunit 5 (Fragment)	NA	NA	NA	NA	NA	NA	1	NA	NA	NA	NA	NA
A0A087WQD8	Traf3ip1	TRAF3-interacting protein 1	NA	NA	NA	NA	NA	NA	NA	NA	NA	1	NA	NA
A0A087WQF8	Ktn1	Kinectin	NA	NA	NA	NA	NA	NA	1	NA	NA	NA	NA	3
A0A087WQG9	Mndal	Myeloid cell nuclear differentiation antigen-like protein (Fragment)	NA	NA	NA	NA	NA	NA	1	NA	NA	NA	NA	NA
A0A087WQQ1	Iqank1	IQ motif and ankyrin repeat-containing 1 (Fragment)	NA	NA	NA	NA	NA	NA	NA	1	1	NA	NA	NA
A0A087WQQ2	Cryba2	Beta-crystallin A2	20	6	23	NA	NA	NA	8	21	14	NA	NA	NA
A0A087WQS9	Tdrd12	Putative ATP-dependent RNA helicase TDRD12 (Fragment)	NA	NA	NA	NA	NA	NA	2	NA	NA	2	NA	NA
A0A087WQV8	Adgrb1	Adhesion G protein-coupled receptor B1	NA	NA	NA	NA	NA	NA	NA	1	1	NA	NA	NA
A0A087WQW8	Fn1	Fibronectin (Fragment)	NA	NA	NA	NA	NA	NA	NA	NA	2	NA	NA	NA
A0A087WR93	U2surp	U2 snRNP-associated SURP motif-containing protein (Fragment)	NA	NA	NA	NA	NA	NA	NA	1	NA	NA	NA	NA
A0A087WR97	Tardbp	TAR DNA-binding protein 43 (Fragment)	NA	NA	NA	NA	NA	NA	1	NA	NA	NA	1	NA
A0A087WRX7	Mdm4	Protein Mdm4	NA	NA	NA	NA	NA	NA	NA	NA	NA	NA	NA	1
A0A087WS46	Eef1b2	Eukaryotic translation elongation factor 1 beta 2	NA	NA	NA	NA	NA	NA	NA	NA	1	NA	NA	NA
A0A087WS56	Fn1	Fibronectin	NA	NA	NA	NA	NA	NA	283	269	172	267	198	190
A0A087WS93	Fam135a	Protein FAM135A (Fragment)	NA	NA	NA	NA	NA	NA	NA	NA	NA	NA	1	NA
A0A087WSL3	Khdrbs2	KH domain-containing, RNA-binding, signal transduction-associated protein 2	NA	NA	NA	NA	NA	NA	NA	1	NA	NA	NA	NA
A0A0A0MQA5	Tuba4a	Tubulin alpha chain (Fragment)	NA	NA	NA	NA	NA	NA	NA	52	NA	NA	NA	NA
A0A0A0MQC6	Elapor1	Endosome/lysosome-associated apoptosis and autophagy regulator 1	NA	NA	NA	NA	NA	NA	NA	NA	NA	3	NA	NA
A0A0A0MQD1	Tdrd7	Tudor domain-containing protein 7	NA	NA	NA	NA	NA	NA	NA	NA	NA	1	NA	NA
A0A0A0MQD9	Prdm11	PR domain-containing protein 11	NA	NA	NA	NA	NA	NA	NA	NA	NA	NA	NA	2
A0A0A0MQG2	Sptbn1	Spectrin beta chain, non-erythrocytic 1 (Fragment)	NA	NA	NA	NA	NA	NA	14	27	NA	NA	NA	NA
A0A0A6YVU1	Nudt5	ADP-sugar pyrophosphatase (Fragment)	NA	NA	NA	NA	NA	NA	1	NA	NA	NA	NA	NA
A0A0A6YVU8	Gm9774	Predicted pseudogene 9774	NA	NA	NA	NA	NA	NA	1	1	1	NA	NA	NA
A0A0A6YW18	Rabgap1l	Rab GTPase-activating protein 1-like (Fragment)	NA	NA	NA	NA	NA	NA	NA	NA	1	NA	NA	NA
A0A0A6YW33	Gm6525	Predicted pseudogene 6525	NA	NA	NA	NA	NA	NA	NA	NA	NA	1	NA	NA
A0A0A6YW63	Usp4	Ubiquitin carboxyl-terminal hydrolase 4 (Fragment)	NA	NA	NA	NA	NA	NA	NA	1	NA	NA	NA	NA
A0A0A6YW80	Naa15	N-alpha-acetyltransferase 15, NatA auxiliary subunit	NA	NA	NA	NA	NA	NA	NA	2	NA	NA	NA	NA
A0A0A6YWA9	Gnai2	Guanine nucleotide-binding protein G(i) subunit alpha-2 (Fragment)	NA	NA	NA	NA	1	NA	NA	NA	1	NA	1	1
A0A0A6YWF4	Exo1	Exonuclease 1 (Fragment)	NA	NA	NA	NA	NA	NA	NA	NA	1	NA	NA	NA
A0A0A6YWG1	Mbnl1	Muscleblind-like protein 1 (Fragment)	NA	NA	NA	NA	NA	NA	1	NA	NA	NA	NA	NA
A0A0A6YWH8	Klhdc8b	Kelch domain-containing protein 8B	NA	NA	NA	NA	NA	NA	NA	NA	NA	NA	NA	1
A0A0A6YWI7	Exo1	Exonuclease 1 (Fragment)	NA	NA	NA	2	NA	NA	NA	1	NA	NA	NA	NA
A0A0A6YWR1	Actl6a	Actin-like protein 6A (Fragment)	NA	NA	NA	NA	NA	NA	NA	1	NA	NA	NA	NA
A0A0A6YWS6	Utp25	UTP25 small subunit processome component	NA	NA	NA	NA	NA	NA	NA	1	NA	NA	NA	NA
A0A0A6YWV7	Ifrd2	Interferon-related developmental regulator 2	NA	NA	NA	NA	NA	NA	1	NA	NA	NA	NA	NA
A0A0A6YWY2	Dcaf8	DDB1- and CUL4-associated factor 8 (Fragment)	NA	NA	NA	NA	NA	NA	1	NA	NA	NA	NA	NA
A0A0A6YXI9	Zc3h11a	Zinc finger CCCH domain-containing protein 11A (Fragment)	NA	NA	NA	NA	NA	NA	NA	NA	NA	NA	NA	1
A0A0A6YXJ4	Astn1	Astrotactin-1	NA	NA	NA	NA	NA	NA	NA	1	NA	NA	NA	NA
A0A0A6YY54	Rbm6	RNA-binding motif protein 6 (Fragment)	NA	NA	NA	NA	NA	NA	NA	NA	1	NA	NA	1
A0A0A6YY72	Impdh2	Inosine-5'-monophosphate dehydrogenase 2 (Fragment)	NA	NA	NA	NA	NA	NA	NA	NA	NA	3	1	1
A0A0B6VLS7	Klk6	Kallikrein related-peptidase 6	NA	NA	NA	NA	NA	NA	NA	1	NA	NA	NA	NA
A0A0G2JDF8	Srrt	Arsenite-resistance protein 2 (Fragment)	NA	NA	NA	NA	NA	NA	3	NA	NA	NA	NA	NA
A0A0G2JDG6	Lrrc2	Leucine-rich repeat-containing protein 2 (Fragment)	NA	NA	NA	NA	NA	NA	NA	NA	NA	NA	1	NA
A0A0G2JDJ7	Csde1	Cold shock domain-containing protein E1 (Fragment)	NA	NA	NA	NA	NA	NA	1	NA	NA	NA	NA	NA
A0A0G2JDK2	Gba	Glucosylceramidase	NA	NA	NA	NA	NA	NA	NA	1	NA	NA	NA	NA
A0A0G2JDW7	Rps27	40S ribosomal protein S27 (Fragment)	NA	NA	NA	NA	NA	NA	NA	1	NA	NA	NA	1
A0A0G2JE29	Pcolce	Procollagen C-endopeptidase enhancer 1 (Fragment)	NA	NA	NA	NA	NA	NA	NA	4	NA	NA	NA	1
A0A0G2JED9	Rap1a	Ras-related protein Rap-1A (Fragment)	NA	NA	NA	NA	NA	NA	NA	NA	NA	NA	NA	1
A0A0G2JEL9	Mbd5	Methyl-CpG-binding domain protein 5 (Fragment)	NA	NA	NA	NA	NA	NA	NA	1	NA	NA	NA	NA
A0A0G2JEM7	Lap3	Cytosol aminopeptidase (Fragment)	NA	NA	NA	NA	NA	NA	1	2	NA	NA	NA	NA
A0A0G2JEN7	St7l	Suppressor of tumorigenicity 7 protein-like (Fragment)	NA	NA	NA	NA	NA	NA	NA	1	2	NA	NA	NA
A0A0G2JF44	Ift22	Intraflagellar transport protein 22 homolog (Fragment)	NA	NA	NA	NA	NA	NA	NA	NA	NA	1	NA	NA
A0A0G2JF64	Mccc1	Methylcrotonoyl-CoA carboxylase subunit alpha, mitochondrial (Fragment)	NA	NA	NA	NA	NA	NA	NA	NA	2	NA	NA	NA
A0A0G2JF97	Psma5	Proteasome subunit alpha type-5 (Fragment)	NA	NA	NA	NA	NA	NA	1	NA	NA	NA	NA	NA
A0A0G2JFC5	Usp53	Inactive ubiquitin carboxyl-terminal hydrolase 53	NA	NA	NA	NA	NA	NA	NA	NA	1	NA	NA	NA
A0A0G2JFE0	Tdrkh	Tudor and KH domain-containing protein	NA	NA	NA	NA	NA	NA	1	NA	NA	NA	NA	NA
A0A0G2JFH2	Map4	Microtubule-associated protein (Fragment)	NA	NA	NA	NA	NA	NA	NA	NA	NA	1	NA	NA
A0A0G2JFP0	Pfkfb4	6-phosphofructo-2-kinase/fructose-2,6-bisphosphatase 4	NA	NA	NA	1	NA	NA	NA	NA	NA	NA	NA	NA
A0A0G2JG10	Dhx15	RNA helicase	NA	NA	NA	NA	NA	NA	11	NA	14	NA	NA	1
A0A0G2JGE9	Efna3	Ephrin-A3	NA	NA	NA	NA	NA	NA	NA	1	NA	NA	NA	NA
A0A0G2JGX5	Elovl6	Very-long-chain 3-oxoacyl-CoA synthase (Fragment)	NA	NA	NA	NA	NA	NA	NA	NA	NA	NA	1	NA
A0A0G2JGY8	Rpl34	60S ribosomal protein L34 (Fragment)	NA	NA	NA	NA	NA	NA	NA	NA	NA	3	1	10
A0A0J9YQM4	Rnf187	E3 ubiquitin-protein ligase RNF187	NA	NA	NA	NA	NA	NA	NA	NA	NA	NA	NA	1
A0A0J9YTW8	Fam193a	Protein FAM193A (Fragment)	NA	NA	NA	NA	NA	NA	1	NA	NA	NA	NA	NA
A0A0J9YTY0	Septin11	Septin-11	NA	NA	NA	NA	NA	NA	6	NA	8	NA	NA	NA
A0A0J9YUC4	Myo1h	Unconventional myosin-Ih	NA	NA	NA	NA	NA	NA	2	2	NA	NA	NA	NA
A0A0J9YUE9	Dnm1	Dynamin GTPase	NA	NA	NA	NA	NA	NA	NA	NA	NA	NA	NA	1
A0A0J9YUH2	Gm7697	Predicted gene 7697	NA	NA	NA	NA	NA	NA	NA	NA	NA	1	NA	NA
A0A0J9YUK0	Ube3a	Ubiquitin-protein ligase E3A (Fragment)	NA	NA	NA	NA	NA	NA	1	NA	1	NA	NA	NA
A0A0J9YUP5	N4bp2	NEDD4-binding protein 2 (Fragment)	NA	NA	NA	NA	NA	NA	NA	NA	NA	NA	NA	1
A0A0J9YUY0	Eif2b4	Translation initiation factor eIF-2B subunit delta (Fragment)	NA	NA	NA	NA	NA	NA	NA	NA	1	NA	NA	NA
A0A0J9YV34	Atp8a1	Phospholipid-transporting ATPase	NA	NA	NA	NA	NA	NA	NA	NA	NA	1	NA	NA
A0A0J9YV71	Nsun7	Putative methyltransferase NSUN7	NA	NA	NA	NA	NA	NA	NA	NA	NA	NA	1	NA
A0A0J9YV96	Ppm1g	Protein phosphatase 1G (Fragment)	NA	NA	NA	NA	NA	NA	NA	NA	2	NA	NA	NA
A0A0J9YVA6	Septin11	Septin-11 (Fragment)	NA	NA	NA	NA	NA	NA	NA	2	NA	NA	NA	NA
A0A0J9YVG0	Ppm1g	Protein phosphatase 1G	NA	NA	NA	NA	NA	NA	2	NA	NA	NA	NA	NA
A0A0M6L0K6	Prl7b1	Growth hormone d17	NA	NA	NA	NA	NA	NA	1	NA	NA	NA	NA	NA
A0A0N4SUK5	Creb5	Cyclic AMP-responsive element-binding protein 5	NA	NA	NA	NA	NA	NA	1	1	NA	NA	NA	NA
A0A0N4SUL6	Emg1	Ribosomal RNA small subunit methyltransferase NEP1 (Fragment)	NA	NA	NA	NA	NA	NA	NA	2	1	NA	NA	NA
A0A0N4SUR4	Wdr49	WD repeat domain 49 (Fragment)	NA	NA	NA	NA	NA	NA	NA	1	NA	NA	NA	NA
A0A0N4SUW8	Eno2	Gamma-enolase	NA	NA	NA	NA	1	NA	NA	NA	NA	NA	1	NA
A0A0N4SV48	Rho	Rhodopsin	NA	5	12	NA	NA	NA	NA	NA	NA	NA	NA	NA
A0A0N4SVA6	Aup1	Ancient ubiquitous protein 1 (Fragment)	NA	NA	NA	NA	NA	NA	NA	NA	NA	NA	1	NA
A0A0N4SVR6	Rab7	RAB7, member RAS oncogene family	NA	NA	NA	NA	NA	NA	NA	2	NA	NA	NA	NA
A0A0N4SVU1	Gm7298	Predicted gene 7298	NA	NA	NA	NA	NA	NA	2	1	1	3	4	7
A0A0N4SW94	Myadm	Myeloid-associated differentiation marker (Fragment)	NA	NA	2	NA	NA	1	NA	3	2	2	4	3
A0A0R3P9D4	Meioc	Meiosis-specific coiled-coil domain-containing protein MEIOC (Fragment)	NA	NA	NA	NA	NA	NA	NA	NA	1	NA	NA	NA
A0A0R4IZY0	Thop1	Thimet oligopeptidase	NA	NA	NA	NA	NA	NA	NA	4	NA	NA	NA	NA
A0A0R4IZY3	Fgfr4	Fibroblast growth factor receptor	NA	NA	NA	NA	NA	NA	1	NA	NA	NA	NA	NA
A0A0R4J016	Dus4l	tRNA-dihydrouridine synthase	NA	NA	NA	NA	NA	NA	NA	NA	NA	1	NA	NA
A0A0R4J049	Prmt5	Protein arginine N-methyltransferase 5	NA	NA	NA	NA	NA	NA	4	6	1	NA	NA	2
A0A0R4J0A7	Clec12b	C-type lectin domain family 12 member B	NA	NA	NA	NA	NA	NA	NA	NA	NA	1	NA	NA
A0A0R4J0I1	Serpina3k	Serine protease inhibitor A3K	NA	NA	NA	1	3	NA	NA	1	NA	NA	NA	NA
A0A0R4J0M6	Colec11	Collectin-11	NA	NA	NA	NA	NA	NA	NA	1	NA	NA	NA	NA
A0A0R4J0N0	Sned1	Sushi, nidogen and EGF-like domain-containing protein 1	NA	NA	NA	NA	NA	NA	1	NA	NA	NA	NA	NA
A0A0R4J0N7	Cyp8b1	7-alpha-hydroxycholest-4-en-3-one 12-alpha-hydroxylase	NA	NA	NA	NA	NA	NA	NA	1	NA	NA	NA	NA
A0A0R4J0Q2	Inpp4a	Inositol polyphosphate-4-phosphatase type I A	NA	NA	NA	NA	NA	NA	NA	NA	NA	1	NA	NA
A0A0R4J0V5	Polr2a	DNA-directed RNA polymerase subunit	NA	NA	NA	NA	NA	NA	16	9	14	5	1	1
A0A0R4J107	Apeh	Acyl-peptide hydrolase (Fragment)	NA	NA	NA	NA	NA	NA	4	1	NA	NA	NA	NA
A0A0R4J119	Cyfip1	Cytoplasmic FMR1-interacting protein	NA	NA	NA	NA	NA	NA	NA	NA	NA	NA	NA	3
A0A0R4J1H8	Shroom3	Protein Shroom3	NA	NA	NA	NA	NA	NA	NA	NA	NA	NA	NA	1
A0A0R4J1T8	Aasdh	Beta-alanine-activating enzyme (Fragment)	NA	NA	NA	NA	NA	NA	NA	NA	2	NA	NA	NA
A0A0U1RNH0	Sox6	Transcription factor SOX-6 (Fragment)	NA	NA	NA	NA	NA	NA	NA	NA	NA	NA	NA	1
A0A0U1RNJ1	Fasn	3-hydroxyacyl-[acyl-carrier-protein] dehydratase	NA	NA	NA	NA	NA	NA	414	490	351	38	41	73
A0A0U1RP68	Idh2	Isocitrate dehydrogenase [NADP], mitochondrial (Fragment)	NA	NA	NA	NA	NA	NA	NA	NA	1	NA	NA	NA
A0A0U1RPI9	Zfp936	Zinc finger protein 936 (Fragment)	NA	NA	NA	NA	NA	NA	NA	NA	NA	1	NA	NA
A0A0U1RPL2	Crebbp	Histone acetyltransferase (Fragment)	NA	NA	NA	NA	NA	NA	NA	NA	1	NA	NA	NA
A0A0U1RQ41	Fanci	Fanconi anemia group I protein homolog (Fragment)	NA	NA	NA	NA	NA	NA	NA	1	NA	NA	NA	NA
A0A0X1KG60	Rnf40	E3 ubiquitin protein ligase	NA	NA	NA	NA	NA	NA	NA	NA	1	NA	NA	NA
A0A140LHA2	Bub3	Mitotic checkpoint protein BUB3	NA	NA	NA	NA	NA	NA	11	4	16	NA	NA	NA
A0A140LHB3	Qars	Glutaminyl-tRNA synthetase (Fragment)	NA	NA	NA	NA	NA	NA	NA	1	NA	NA	NA	NA
A0A140LHB6	Vstm2a	V-set and transmembrane domain-containing protein 2A (Fragment)	NA	NA	NA	NA	NA	NA	NA	NA	1	NA	NA	NA
A0A140LHF7	Prmt1	Protein arginine N-methyltransferase 1	NA	NA	NA	NA	NA	NA	NA	30	NA	NA	NA	NA
A0A140LHL1	Magi2	Membrane-associated guanylate kinase, WW and PDZ domain-containing protein 2	NA	NA	NA	NA	NA	NA	NA	NA	1	NA	NA	NA
A0A140LI67	Frmpd2	FERM and PDZ domain-containing 2	NA	NA	NA	NA	NA	NA	1	NA	1	NA	NA	NA
A0A140LI77	Rps3	40S ribosomal protein S3	NA	NA	NA	1	NA	1	NA	NA	NA	NA	NA	NA
A0A140LIG1	Piga	N-acetylglucosaminyl-phosphatidylinositol biosynthetic protein (Fragment)	NA	NA	NA	NA	NA	NA	NA	NA	1	NA	NA	NA
A0A140LIM5	Bub3	Mitotic checkpoint protein BUB3	NA	NA	NA	NA	NA	NA	NA	NA	NA	NA	1	2
A0A140LIR6	Fbl	rRNA 2'-O-methyltransferase fibrillarin (Fragment)	NA	NA	NA	NA	NA	NA	NA	2	NA	NA	NA	NA
A0A140LIV1	Spef2	Sperm flagellar protein 2	NA	NA	NA	NA	1	NA	NA	NA	NA	NA	NA	NA
A0A140LIW5	Izumo2	Izumo sperm-egg fusion protein 2 (Fragment)	NA	NA	NA	NA	NA	NA	NA	1	NA	NA	1	NA
A0A140LJ37	Nap1l4	Nucleosome assembly protein 1-like 4 (Fragment)	NA	NA	NA	NA	NA	NA	NA	NA	NA	1	NA	NA
A0A140LJ59	Eif3k	Eukaryotic translation initiation factor 3 subunit K	NA	NA	NA	NA	NA	NA	NA	1	NA	NA	NA	NA
A0A140LJ70	Prmt1	Protein arginine N-methyltransferase 1	NA	NA	NA	NA	NA	NA	22	NA	NA	5	NA	NA
A0A140LJ72	Muc16	Mucin 16	NA	NA	NA	NA	NA	NA	NA	NA	2	NA	NA	NA
A0A140LJB7	Gps1	COP9 signalosome complex subunit 1	NA	NA	NA	NA	NA	NA	NA	NA	NA	1	NA	NA
A0A140LJL0	Cd81	CD81 antigen (Fragment)	NA	NA	NA	NA	NA	NA	NA	1	NA	NA	1	2
A0A140T8R7	Rcor1	REST corepressor 1	NA	NA	NA	NA	NA	NA	NA	NA	NA	1	NA	NA
A0A171KXD3	Prmt1	Protein arginine N-methyltransferase 1	NA	NA	NA	NA	NA	NA	NA	NA	62	NA	NA	NA
A0A182DWE6	Lonrf1	LON peptidase N-terminal domain and RING finger protein 1	NA	NA	NA	NA	NA	NA	NA	NA	1	NA	NA	NA
A0A1B0GQU8	Rpl18	60S ribosomal protein L18	NA	NA	NA	NA	NA	NA	NA	NA	NA	NA	NA	16
A0A1B0GR11	Taldo1	Transaldolase	NA	NA	NA	NA	NA	NA	NA	NA	1	NA	NA	NA
A0A1B0GR64	Inppl1	Phosphatidylinositol 3,4,5-trisphosphate 5-phosphatase 2 (Fragment)	NA	NA	NA	NA	NA	NA	NA	NA	1	NA	NA	NA
A0A1B0GR69	Snrnp70	U1 small nuclear ribonucleoprotein 70 kDa (Fragment)	NA	NA	NA	NA	NA	NA	NA	NA	NA	1	NA	NA
A0A1B0GR89	Ruvbl2	RuvB-like helicase (Fragment)	NA	NA	NA	NA	NA	NA	NA	NA	NA	1	NA	NA
A0A1B0GRC1	Ldha	L-lactate dehydrogenase A chain (Fragment)	NA	NA	1	NA	NA	NA	NA	NA	NA	NA	NA	NA
A0A1B0GRD4	Tubgcp2	Gamma-tubulin complex component 2 (Fragment)	NA	NA	NA	NA	NA	NA	NA	NA	NA	NA	1	NA
A0A1B0GRG1	Rras	Ras-related protein R-Ras (Fragment)	NA	NA	NA	1	NA	NA	NA	NA	NA	NA	NA	NA
A0A1B0GRR3	Rps11	40S ribosomal protein S11	NA	NA	NA	NA	NA	NA	NA	1	NA	6	2	5
A0A1B0GRS8	Acsl1	Long-chain-fatty-acid--CoA ligase 1 (Fragment)	NA	NA	NA	NA	NA	NA	NA	NA	NA	1	NA	NA
A0A1B0GS09	Tsg101	Tumor susceptibility gene 101 protein (Fragment)	NA	NA	NA	NA	NA	NA	1	NA	NA	NA	NA	2
A0A1B0GSA8	Rpl18	60S ribosomal protein L18 (Fragment)	NA	NA	NA	NA	NA	NA	NA	NA	3	NA	NA	NA
A0A1B0GSB4	Srek1	Splicing regulatory glutamine/lysine-rich protein 1	NA	NA	NA	NA	NA	NA	NA	NA	NA	NA	1	1
A0A1B0GSB7	Got1l1	Putative aspartate aminotransferase, cytoplasmic 2 (Fragment)	NA	NA	NA	NA	NA	NA	1	NA	NA	NA	NA	NA
A0A1B0GSF7	Rpl18	60S ribosomal protein L18	NA	NA	NA	1	NA	NA	2	1	NA	11	15	NA
A0A1B0GSL4	Rhog	Rho-related GTP-binding protein RhoG (Fragment)	NA	NA	NA	NA	NA	NA	NA	NA	NA	1	NA	NA
A0A1B0GSN3	Aldh16a1	Aldehyde dehydrogenase family 16 member A1 (Fragment)	NA	NA	NA	NA	NA	NA	NA	2	NA	NA	NA	NA
A0A1B0GSQ6	Rpl13a	60S ribosomal protein L13a (Fragment)	NA	NA	NA	NA	NA	NA	NA	NA	NA	7	12	11
A0A1B0GSX7	Nup98	Nuclear pore complex protein Nup96	NA	NA	NA	NA	NA	NA	NA	NA	NA	1	NA	NA
A0A1B0GT00	Rpl13a	60S ribosomal protein L13a (Fragment)	NA	NA	NA	NA	NA	NA	NA	2	NA	NA	NA	NA
A0A1B0GT37	Tnpo2	Transportin-2 (Fragment)	NA	NA	NA	NA	NA	NA	NA	NA	2	NA	NA	NA
A0A1B0GT92	Gys1	Glycogen [starch] synthase	NA	NA	NA	NA	NA	NA	NA	NA	NA	3	NA	NA
A0A1B0GX25	Hdac6	Histone deacetylase 6 (Fragment)	NA	NA	NA	NA	NA	NA	3	2	3	NA	NA	2
A0A1C7ZMY3	Shank2	SH3 and multiple ankyrin repeat domains protein 2	NA	NA	NA	NA	NA	NA	1	NA	NA	NA	NA	NA
A0A1D5RL98	Il12rb1	Interleukin-12 receptor subunit beta-1	NA	NA	NA	NA	NA	NA	1	NA	2	NA	NA	NA
A0A1D5RLD4	Polr2c	DNA-directed RNA polymerase II subunit RPB3 (Fragment)	NA	NA	NA	NA	NA	NA	1	NA	NA	NA	NA	NA
A0A1D5RLF0	Fbxw27	F-box and WD-40 domain protein 27	NA	NA	NA	NA	NA	NA	NA	NA	1	NA	NA	NA
A0A1D5RLM8	Gm11639	Predicted gene 11639	NA	NA	NA	NA	NA	NA	1	NA	NA	NA	NA	NA
A0A1D5RLM9	Polr2c	DNA-directed RNA polymerase II subunit RPB3 (Fragment)	NA	NA	NA	NA	NA	NA	NA	NA	1	NA	NA	NA
A0A1D5RLP7	Slc12a3	Solute carrier family 12 member 3	NA	NA	NA	NA	NA	NA	1	NA	NA	NA	NA	NA
A0A1D5RLU7	Zfp1	Zinc finger protein 1	NA	NA	NA	NA	NA	NA	NA	1	NA	NA	NA	NA
A0A1D5RLV3	Unc80	Protein unc-80 homolog	NA	NA	NA	NA	NA	NA	NA	NA	NA	NA	1	NA
A0A1D5RM76	Tubb3	Tubulin beta-3 chain	NA	NA	NA	1	NA	NA	NA	NA	NA	NA	NA	NA
A0A1D5RMC7	Rpl18a	60S ribosomal protein L18a	NA	NA	NA	NA	NA	NA	NA	NA	NA	2	NA	NA
A0A1D5RME4	Rpl18a	60S ribosomal protein L18a (Fragment)	NA	NA	NA	NA	NA	NA	NA	NA	NA	NA	NA	3
A0A1D5RMI6	Cdh16	Cadherin-16 (Fragment)	NA	NA	NA	NA	NA	NA	NA	NA	1	NA	NA	NA
A0A1G5SJ67	OTTMUSCASG00059402	NLR family, pyrin domain containing 1B, CAST/EiJ specific, allele 3	NA	NA	NA	NA	NA	NA	NA	1	NA	NA	NA	NA
A0A1G5SJR4	OTTMUSCASG00059405	Schlafen family member 5 isoform 1	NA	NA	NA	NA	NA	NA	NA	NA	NA	NA	NA	1
A0A1L1SQA8	Rps25	40S ribosomal protein S25	NA	NA	NA	NA	NA	NA	2	1	2	18	17	11
A0A1L1SR77	Wdr72	WD repeat-containing protein 72	NA	NA	NA	NA	NA	NA	NA	1	NA	NA	NA	NA
A0A1L1SRG5	Cryab	Alpha-crystallin B chain (Fragment)	2	1	NA	NA	NA	NA	NA	16	NA	NA	NA	NA
A0A1L1SSP2	C2cd2l	Phospholipid transfer protein C2CD2L (Fragment)	NA	NA	NA	NA	NA	NA	NA	1	NA	NA	NA	NA
A0A1L1SSW7	Fam214a	Protein FAM214A	NA	NA	NA	NA	NA	NA	3	2	1	1	2	NA
A0A1L1STC6	Syne1	Nesprin-1	NA	NA	NA	NA	NA	NA	1	NA	NA	NA	NA	NA
A0A1L1STZ4	Nos2	Nitric oxide synthase	NA	NA	NA	NA	NA	NA	NA	1	NA	NA	NA	NA
A0A1L1SU37	Pkm	Pyruvate kinase (Fragment)	2	1	1	3	NA	NA	93	104	96	23	5	7
A0A1L1SU53	Twf2	Twinfilin-2 (Fragment)	NA	NA	NA	NA	NA	NA	NA	1	NA	NA	NA	NA
A0A1L1SU97	Kif15	Kinesin-like protein KIF15 (Fragment)	NA	NA	NA	NA	NA	NA	NA	NA	NA	1	NA	NA
A0A1L1SUK3	Rpsa	40S ribosomal protein SA	NA	NA	NA	1	NA	NA	NA	NA	NA	NA	NA	NA
A0A1L1SUN1	Rpl29	60S ribosomal protein L29 (Fragment)	NA	NA	NA	NA	NA	NA	1	NA	NA	NA	NA	NA
A0A1L1SUT5	4930563M21Rik	RIKEN cDNA 4930563M21 gene (Fragment)	NA	NA	NA	NA	NA	NA	1	NA	NA	NA	NA	NA
A0A1R3UCH3	Klk1b24	Kallikrein a9	NA	1	NA	NA	NA	NA	NA	NA	NA	NA	NA	NA
A0A1S6GWH1	Psmc5	AAA domain-containing protein	NA	NA	NA	NA	NA	NA	18	NA	NA	NA	NA	NA
A0A1W2P6G5	Myl6	Myosin light polypeptide 6	NA	NA	NA	NA	NA	NA	NA	NA	3	1	NA	NA
A0A1W2P6G7	Nkain2	Sodium/potassium-transporting ATPase subunit beta-1-interacting protein 2	NA	NA	NA	NA	NA	NA	NA	NA	NA	1	NA	NA
A0A1W2P6H1	Obscn	Non-specific serine/threonine protein kinase	NA	NA	NA	NA	NA	NA	1	1	1	NA	NA	NA
A0A1W2P6L9	Pxdn	Peroxidasin homolog	NA	NA	NA	NA	NA	NA	NA	NA	NA	NA	2	4
A0A1W2P6U1	Txnrd1	Thioredoxin reductase 1, cytoplasmic (Fragment)	NA	NA	NA	NA	NA	NA	NA	NA	1	NA	NA	NA
A0A1W2P6U8	4932415D10Rik	RIKEN cDNA 4932415D10 gene	NA	NA	NA	NA	NA	NA	1	NA	NA	NA	NA	NA
A0A1W2P6V6	Mdm1	Nuclear protein MDM1	NA	NA	NA	NA	NA	NA	NA	1	NA	NA	NA	NA
A0A1W2P6Z6	Calhm4	Calcium homeostasis modulator protein 4	NA	NA	NA	NA	NA	NA	NA	NA	1	NA	NA	NA
A0A1W2P733	Mthfd1	C-1-tetrahydrofolate synthase, cytoplasmic	NA	NA	NA	NA	NA	NA	NA	11	12	NA	NA	NA
A0A1W2P752	Cfap54	Cilia- and flagella-associated protein 54 (Fragment)	NA	NA	NA	NA	NA	NA	NA	NA	NA	1	NA	NA
A0A1W2P756	Timm13	Mitochondrial import inner membrane translocase subunit	NA	NA	NA	NA	NA	NA	NA	NA	1	1	NA	NA
A0A1W2P763	Enpp3	Ectonucleotide pyrophosphatase/phosphodiesterase family member 3 (Fragment)	NA	NA	NA	NA	NA	NA	1	NA	NA	1	NA	NA
A0A1W2P7C6	Ros1	Proto-oncogene tyrosine-protein kinase ROS	NA	NA	NA	NA	NA	NA	NA	NA	1	NA	NA	NA
A0A1W2P7Q6	Xpot	Exportin-T	NA	NA	NA	NA	NA	NA	NA	1	NA	NA	NA	NA
A0A1Y7VJ05	Hecw1	HECT-type E3 ubiquitin transferase (Fragment)	NA	NA	NA	NA	NA	NA	NA	1	NA	NA	NA	NA
A0A1Y7VJP1	Ryr2	Ryanodine receptor 2 (Fragment)	NA	NA	NA	NA	NA	NA	NA	1	NA	NA	NA	NA
A0A1Y7VJQ6	Aopep	Aminopeptidase O (Fragment)	NA	NA	NA	NA	NA	NA	2	NA	NA	NA	NA	NA
A0A1Y7VJW9	Fbln5	Fibulin-5	NA	NA	NA	NA	NA	NA	NA	NA	NA	NA	1	NA
A0A1Y7VKB8	Cdk20	Cyclin-dependent kinase 20 (Fragment)	NA	NA	NA	NA	NA	NA	NA	4	NA	NA	NA	NA
A0A1Y7VL71	Actr10	Actin-related protein 10 (Fragment)	NA	NA	NA	NA	NA	NA	NA	3	2	NA	NA	2
A0A1Y7VLA4	Tasor2	Protein TASOR 2 (Fragment)	NA	NA	NA	NA	NA	NA	NA	NA	NA	1	NA	NA
A0A1Y7VLR4	Trip13	Pachytene checkpoint protein 2 homolog (Fragment)	NA	NA	NA	NA	NA	NA	NA	2	NA	NA	NA	NA
A0A1Y7VLT3	Prpf4b	Serine/threonine-protein kinase PRP4 homolog (Fragment)	NA	NA	NA	NA	NA	NA	NA	NA	1	NA	NA	NA
A0A1Y7VLX7	Ranbp9	Ran-binding protein 9 (Fragment)	NA	NA	NA	NA	NA	NA	NA	1	NA	NA	NA	NA
A0A1Y7VM95	Cdc42bpb	Serine/threonine-protein kinase MRCK beta (Fragment)	NA	NA	NA	NA	NA	NA	NA	NA	NA	NA	NA	1
A0A1Y7VMA3	Fancm	Fanconi anemia group M protein homolog (Fragment)	NA	1	NA	NA	NA	NA	NA	NA	NA	NA	NA	NA
A0A1Y7VN19	Dhrs7	Dehydrogenase/reductase SDR family member 7 (Fragment)	NA	NA	NA	NA	NA	NA	NA	1	NA	NA	NA	NA
A0A1Y7VNR7	Akr1c6	Estradiol 17 beta-dehydrogenase 5	NA	NA	NA	NA	NA	NA	NA	2	NA	NA	NA	NA
A0A1Y7VNT1	Habp4	Intracellular hyaluronan-binding protein 4	NA	NA	NA	NA	NA	NA	NA	NA	1	NA	NA	NA
A0A1Z1GHX4	Rexo5	RNA exonuclease 5 short isoform (Fragment)	NA	NA	NA	NA	NA	NA	NA	NA	NA	1	NA	NA
A0A217FL67	Eml5	Echinoderm microtubule-associated protein-like 5	NA	NA	NA	NA	NA	NA	NA	NA	1	NA	NA	NA
A0A286R3P5	H2	MHC class I antigen (Fragment)	NA	NA	NA	NA	NA	NA	6	NA	NA	NA	NA	NA
A0A286YCN3	Adk	Adenosine kinase (Fragment)	NA	NA	NA	NA	NA	NA	2	NA	NA	NA	NA	NA
A0A286YCT3	Vps13a	Vacuolar protein sorting-associated protein 13A	NA	NA	NA	NA	NA	NA	NA	NA	2	NA	NA	NA
A0A286YCW5	Thoc7	THO complex subunit 7 homolog	NA	NA	NA	NA	NA	NA	NA	NA	NA	1	NA	NA
A0A286YD76	Macf1	Microtubule-actin cross-linking factor 1 (Fragment)	NA	NA	NA	NA	NA	NA	NA	NA	NA	NA	NA	1
A0A286YDN1	Eml3	Echinoderm microtubule-associated protein-like 3	NA	NA	NA	NA	NA	NA	1	NA	NA	NA	NA	NA
A0A286YDT1	Ttc37	Tetratricopeptide repeat domain 37 (Fragment)	NA	NA	NA	NA	NA	NA	NA	2	2	NA	NA	2
A0A286YE27	Fam193b	Protein FAM193B	NA	NA	NA	NA	NA	NA	1	NA	NA	NA	NA	NA
A0A286YE28	Tkt	Transketolase (Fragment)	NA	NA	NA	1	NA	NA	2	NA	3	NA	NA	NA
A0A286YEB7	Rps24	40S ribosomal protein S24	NA	NA	NA	NA	NA	NA	NA	NA	NA	1	NA	NA
A0A2C9F2A2	Rin1	Ras and Rab interactor 1	NA	NA	NA	NA	NA	NA	NA	NA	1	NA	NA	NA
A0A2I3BPT1	App	ABPP	NA	NA	NA	NA	NA	NA	NA	NA	17	NA	NA	NA
A0A2I3BQ03	Ywhaz	14-3-3 protein zeta/delta (Fragment)	NA	NA	NA	NA	NA	NA	6	9	2	NA	NA	NA
A0A2I3BQ30	Itm2b	Integral membrane protein 2B	NA	NA	NA	NA	NA	NA	NA	NA	NA	NA	NA	3
A0A2I3BQV5	Xpo7	Exportin-7	NA	NA	NA	NA	NA	NA	1	5	1	NA	1	2
A0A2I3BR03	App	ABPP	NA	NA	NA	NA	NA	NA	NA	7	NA	NA	NA	NA
A0A2I3BR37	Pabpc1	Polyadenylate-binding protein 1 (Fragment)	NA	NA	NA	NA	NA	NA	NA	1	NA	NA	NA	NA
A0A2I3BR52	Tmem253	Transmembrane protein 253	NA	NA	NA	NA	NA	NA	NA	NA	NA	NA	NA	1
A0A2I3BR78	Dis3	Exosome complex exonuclease RRP44	NA	NA	NA	NA	NA	NA	5	4	1	NA	NA	NA
A0A2I3BRT4	Eppk1	Epiplakin	NA	NA	NA	NA	NA	NA	NA	NA	2	NA	NA	NA
A0A2R8VH97	Eif3l	Eukaryotic translation initiation factor 3 subunit L (Fragment)	NA	NA	NA	NA	NA	NA	2	7	1	1	NA	NA
A0A2R8VHA9	Apol7b	Apolipoprotein L 7b (Fragment)	NA	NA	NA	NA	1	NA	NA	4	NA	6	5	4
A0A2R8VHF9	Myh11	Myosin-11	NA	NA	NA	NA	NA	NA	1	5	4	1	1	1
A0A2R8VHK9	Rangap1	Ran GTPase-activating protein 1 (Fragment)	NA	NA	NA	NA	NA	NA	NA	NA	1	NA	NA	NA
A0A2R8VHL1	Csnk1e	Casein kinase I isoform epsilon (Fragment)	NA	NA	NA	NA	NA	NA	NA	NA	1	NA	NA	NA
A0A2R8VHN3	Pcbp2	Poly(rC)-binding protein 2 (Fragment)	NA	NA	NA	NA	NA	NA	NA	NA	1	NA	NA	NA
A0A2R8VHP3	Gm5478	Predicted pseudogene 5478	NA	NA	NA	NA	NA	NA	NA	1	NA	NA	NA	NA
A0A2R8VHW2	Rsl1d1	Ribosomal L1 domain-containing protein 1 (Fragment)	NA	NA	NA	NA	NA	NA	NA	NA	NA	NA	NA	1
A0A2R8VK20	Eif3d	Eukaryotic translation initiation factor 3 subunit D (Fragment)	NA	NA	NA	NA	NA	NA	3	1	NA	NA	NA	NA
A0A2R8VK76	Cpsf1	Cleavage and polyadenylation-specificity factor subunit 1	NA	NA	NA	NA	NA	NA	1	1	6	NA	NA	2
A0A2R8VKI5	Myh9	Myosin-9 (Fragment)	NA	NA	NA	NA	NA	NA	NA	NA	NA	NA	NA	1
A0A2R8VKL9	Tsta3	GDP-L-fucose synthase	NA	NA	NA	NA	NA	NA	NA	2	NA	NA	NA	NA
A0A2R8VKP3	Smarcd1	SWI/SNF-related matrix-associated actin-dependent regulator of chromatin subfamily D member 1	1	NA	NA	NA	NA	NA	NA	NA	NA	NA	NA	NA
A0A2R8W6G4	Micall1	MICAL-like protein 1	NA	NA	NA	NA	NA	NA	1	NA	NA	NA	NA	NA
A0A2R8W6N0	Tsta3	GDP-L-fucose synthase	NA	NA	NA	NA	NA	NA	1	NA	NA	NA	NA	NA
A0A2R8W6V7	Myh9	Myosin-9 (Fragment)	NA	NA	NA	NA	NA	NA	NA	1	NA	1	NA	NA
A0A2R8W6Z9	Col22a1	Collagen, type XXII, alpha 1	NA	NA	NA	NA	NA	NA	3	NA	NA	NA	NA	NA
A0A2S0DFH8	Anti-HIV fusion peptide monocolonal anitbody light chain vFP6.01	Anti-HIV fusion peptide monocolonal anitbody light chain vFP6.01 (Fragment)	NA	NA	NA	NA	NA	NA	NA	NA	1	NA	NA	NA
A0A2S1B6F9	Syngap1	SynGAP E alpha1 isoform	NA	NA	NA	NA	NA	NA	NA	NA	2	NA	NA	NA
A0A2U3TZ82	Triobp	TRIO and F-actin-binding protein	NA	NA	NA	NA	NA	NA	NA	NA	2	NA	NA	NA
A0A2U3TZF4	Mief1	Mitochondrial dynamics protein MID51	NA	NA	NA	NA	NA	NA	1	NA	NA	NA	NA	NA
A0A2Z4SX67	H2-D1	MHC class II antigen D (Fragment)	NA	NA	NA	NA	NA	NA	NA	NA	NA	NA	1	NA
A0A338P6E7	Nrros	Transforming growth factor beta activator LRRC33	NA	NA	NA	NA	NA	NA	NA	NA	NA	1	NA	NA
A0A338P6G6	Hmga1	High mobility group protein HMG-I/HMG-Y	NA	NA	NA	NA	NA	NA	NA	1	NA	NA	NA	NA
A0A338P6P2	Yeats2	YEATS domain-containing protein 2 (Fragment)	NA	NA	NA	NA	NA	NA	1	NA	NA	NA	NA	NA
A0A338P6T4	Ap2m1	AP-2 complex subunit mu (Fragment)	NA	NA	NA	NA	NA	NA	NA	1	NA	NA	NA	NA
A0A338P6V9	Ccdc14	Coiled-coil domain-containing protein 14	NA	NA	NA	NA	NA	NA	1	NA	NA	NA	NA	NA
A0A338P6X4	Gart	Trifunctional purine biosynthetic protein adenosine-3 (Fragment)	NA	NA	NA	NA	NA	NA	NA	NA	NA	1	NA	NA
A0A338P723	Crybg3	Beta/gamma crystallin domain-containing protein 3 (Fragment)	NA	NA	NA	NA	NA	NA	NA	NA	3	NA	NA	NA
A0A338P783	Grm4	Metabotropic glutamate receptor 4	NA	NA	NA	NA	NA	NA	NA	NA	1	NA	NA	NA
A0A338P794	Alg3	Dol-P-Man:Man(5)GlcNAc(2)-PP-Dol alpha-1,3-mannosyltransferase	NA	NA	NA	NA	NA	NA	NA	NA	1	NA	NA	NA
A0A338P7C0	Psmb1	Proteasome endopeptidase complex	NA	NA	NA	NA	NA	NA	1	NA	2	1	NA	NA
A0A338P7D0	Kng2	Kininogen 2 (Fragment)	NA	NA	NA	NA	NA	NA	NA	1	NA	NA	NA	NA
A0A3B0IP04	C1qa	Complement C1q subcomponent subunit A	NA	NA	NA	NA	NA	NA	NA	1	NA	NA	NA	NA
A0A3B2W433	Lca5l	Lebercilin-like protein	NA	NA	NA	NA	NA	NA	NA	1	NA	NA	NA	NA
A0A3B2W4I2	Memo1	Mediator of ErbB2-driven cell motility 1	NA	NA	NA	NA	NA	NA	1	NA	NA	NA	NA	NA
A0A3B2WB00	Brwd1	Bromodomain and WD repeat-containing protein 1 (Fragment)	NA	NA	NA	NA	NA	NA	1	NA	NA	1	NA	NA
A0A3B2WC95	Vmn2r28	Vomeronasal 2, receptor 28	NA	NA	NA	NA	NA	NA	2	NA	NA	NA	NA	NA
A0A3B2WCP5	Vmn2r26	Vomeronasal type-2 receptor 26	NA	NA	NA	NA	NA	NA	NA	NA	NA	1	NA	NA
A0A3B2WCT5	Vmn2r65	Vomeronasal 2, receptor 65	NA	NA	NA	NA	NA	NA	NA	1	NA	NA	NA	NA
A0A3B2WD76	Catsperd	Cation channel sperm-associated protein subunit delta (Fragment)	NA	NA	NA	NA	NA	NA	NA	1	NA	NA	NA	NA
A0A3Q4EBV8	Thoc1	THO complex subunit 1 (Fragment)	NA	NA	NA	NA	NA	NA	NA	2	NA	NA	NA	NA
A0A3Q4EGA7	Nubp2	Cytosolic Fe-S cluster assembly factor NUBP2	NA	NA	NA	NA	NA	NA	NA	NA	1	NA	NA	NA
A0A3Q4EGK3	Ltbp1	Latent-transforming growth factor beta-binding protein 1	NA	NA	NA	NA	NA	NA	19	12	17	3	NA	3
A0A3Q4L2W0	Snrpd1	Small nuclear ribonucleoprotein Sm D1	NA	NA	NA	NA	NA	NA	1	NA	NA	NA	NA	NA
A0A482D1Q0	H2-D1	MHC class I heavy chain heavy chain (Fragment)	NA	NA	NA	NA	NA	NA	NA	NA	19	NA	NA	NA
A0A494B908	Gstp1	GST class-pi (Fragment)	NA	NA	NA	NA	NA	NA	NA	1	NA	NA	NA	NA
A0A494B987	Ddb1	DNA damage-binding protein 1	NA	NA	NA	NA	NA	NA	NA	4	NA	NA	NA	NA
A0A494B9B2	Sil1	Nucleotide exchange factor SIL1	NA	NA	NA	NA	NA	NA	NA	NA	1	NA	NA	NA
A0A494B9F5	Ndfip1	NEDD4 family-interacting protein 1 (Fragment)	NA	NA	NA	NA	NA	NA	1	NA	NA	NA	NA	NA
A0A494B9F8	Prelid3a	PRELI domain-containing protein 3A (Fragment)	NA	NA	NA	NA	1	NA	NA	NA	NA	NA	NA	NA
A0A494B9G0	Nars	Asparaginyl-tRNA synthetase	NA	NA	NA	NA	NA	NA	NA	NA	1	NA	NA	NA
A0A494B9P2	Tmx3	Protein disulfide-isomerase TMX3 (Fragment)	NA	NA	NA	NA	NA	NA	NA	1	NA	NA	NA	NA
A0A494B9T0	Cpsf7	Cleavage and polyadenylation-specificity factor subunit 7 (Fragment)	NA	NA	NA	NA	NA	NA	NA	NA	1	NA	NA	NA
A0A494B9U5	Pde9a	High affinity cGMP-specific 3',5'-cyclic phosphodiesterase 9A	NA	NA	NA	NA	NA	NA	NA	NA	1	NA	NA	NA
A0A494BA00	Ska1	Spindle and kinetochore-associated protein 1	NA	NA	NA	NA	NA	NA	NA	NA	1	NA	NA	NA
A0A494BAA3	Oga	Protein O-GlcNAcase (Fragment)	NA	NA	NA	NA	NA	NA	NA	1	NA	NA	NA	NA
A0A494BAF6	Ddb1	DNA damage-binding protein 1 (Fragment)	NA	NA	NA	NA	NA	NA	1	NA	NA	NA	NA	NA
A0A494BAQ2	Nfkb2	Nuclear factor NF-kappa-B p100 subunit	NA	NA	NA	NA	NA	NA	1	NA	NA	NA	NA	NA
A0A494BAS3	Gstp2	Glutathione S-transferase P 2 (Fragment)	NA	NA	NA	NA	NA	NA	NA	NA	NA	1	NA	NA
A0A494BAX5	Nars	Asparagine--tRNA ligase (Fragment)	NA	NA	NA	NA	NA	NA	3	NA	NA	3	NA	NA
A0A494BB17	Kctd16	BTB/POZ domain-containing protein KCTD16 (Fragment)	NA	NA	NA	NA	NA	NA	NA	NA	1	NA	NA	NA
A0A494BB49	Cd5	T-cell surface glycoprotein CD5	NA	NA	NA	NA	NA	NA	NA	NA	1	NA	NA	NA
A0A494BB86	Actr1a	Alpha-centractin	NA	NA	NA	NA	NA	NA	114	120	NA	54	122	120
A0A494BBB9	Jak2	Tyrosine-protein kinase (Fragment)	NA	NA	NA	NA	NA	NA	1	NA	NA	NA	NA	NA
A0A494BBD8	Anxa1	Annexin	NA	NA	NA	NA	NA	NA	NA	NA	1	NA	NA	1
A0A494BBF5	Napg	Gamma-soluble NSF attachment protein (Fragment)	NA	NA	NA	NA	NA	NA	2	NA	NA	NA	NA	NA
A0A494BBI1	Txnl1	Thioredoxin-like protein 1	NA	NA	NA	NA	NA	NA	NA	NA	1	NA	NA	NA
A0A4X5	Siglech	Uncharacterized protein	NA	NA	NA	NA	NA	NA	NA	NA	NA	1	NA	NA
A0A4X8	Kirrel2	Uncharacterized protein	NA	NA	NA	NA	NA	NA	NA	NA	1	NA	NA	NA
A0A571BDK5	Ccdc30	Coiled-coil domain-containing protein 30	NA	NA	NA	NA	NA	NA	NA	1	NA	NA	NA	NA
A0A571BDN3	Nav3	Neuron navigator 3	NA	NA	NA	NA	NA	NA	NA	NA	NA	1	NA	NA
A0A571BEI2	Aak1	AP2-associated protein kinase 1 (Fragment)	NA	NA	1	5	NA	2	NA	NA	11	NA	2	1
A0A571BEM2	Gnas	Guanine nucleotide-binding protein G(s) subunit alpha isoforms short	NA	NA	NA	NA	NA	NA	NA	1	NA	NA	NA	NA
A0A571BEU1	Tpm4	Tropomyosin alpha-4 chain	NA	NA	NA	NA	NA	NA	NA	NA	NA	1	NA	NA
A0A571BFV4	Map3k19	Mitogen-activated protein kinase kinase kinase 19 (Fragment)	NA	NA	NA	NA	NA	NA	NA	NA	NA	NA	NA	1
A0A571BGE2	Scml2	Scm polycomb group protein-like 2 (Fragment)	NA	NA	NA	NA	NA	NA	2	NA	NA	NA	NA	NA
A0A589MR22	Frmpd4	FERM and PDZ domain-containing protein 4	NA	NA	NA	NA	NA	NA	NA	NA	1	NA	NA	NA
A0A5F8MPR4	Xirp2	Xin actin-binding repeat-containing protein 2	NA	NA	NA	NA	NA	NA	1	1	NA	NA	NA	NA
A0A5F8MPS5	Nrg1	Neuregulin 1	NA	NA	NA	NA	NA	NA	NA	1	NA	NA	NA	NA
A0A5F8MPS6	Pdzrn3	E3 ubiquitin-protein ligase PDZRN3 (Fragment)	NA	NA	NA	NA	NA	NA	1	NA	NA	NA	NA	NA
A0A5F8MPT9	Iqsec1	IQ motif and SEC7 domain-containing protein 1 (Fragment)	NA	NA	NA	NA	NA	NA	NA	1	NA	NA	NA	NA
A0A5H1ZRL3	Nelfb	Negative elongation factor B	NA	NA	NA	NA	NA	NA	1	NA	1	NA	NA	NA
A0A5K1VVQ1	Ttn	Titin	NA	NA	NA	NA	NA	NA	NA	NA	2	NA	NA	NA
A0A5K1VVQ9	Ttn	Titin	NA	NA	NA	NA	NA	NA	3	NA	NA	NA	NA	NA
A0A668KL68	Nkrf	NF-kappa-B-repressing factor	NA	NA	NA	NA	NA	NA	NA	NA	1	NA	NA	NA
A0A6I8MX08	Ccdc88a	Girdin	NA	NA	NA	NA	NA	NA	1	NA	NA	NA	NA	NA
A0A6I8MX30	Trhde	Thyrotropin-releasing hormone-degrading ectoenzyme	NA	NA	1	NA	NA	NA	1	NA	3	NA	NA	NA
A0JLN0	Sf3b1	Sf3b1 protein (Fragment)	NA	NA	NA	NA	NA	NA	NA	2	3	NA	NA	NA
A0JLU3	Psmd1	Psmd1 protein (Fragment)	NA	NA	NA	NA	NA	NA	NA	NA	NA	2	NA	NA
A0JLV3	Hist1h2bj	Histone H2B (Fragment)	NA	NA	NA	NA	NA	NA	4	13	2	3	1	NA
A0JNY3	Gphn	Molybdopterin molybdenumtransferase	NA	NA	NA	NA	NA	NA	NA	1	NA	NA	NA	NA
A0JNZ1	Pik3cb	Phosphatidylinositol-4,5-bisphosphate 3-kinase	NA	NA	NA	NA	NA	NA	NA	NA	NA	NA	NA	1
A1A4T2	Ganab	Alpha glucosidase 2 alpha neutral subunit	NA	NA	NA	NA	NA	NA	5	13	8	NA	NA	NA
A1A550	Tcf7l1	Transcription factor 3	NA	1	NA	NA	NA	NA	NA	NA	NA	NA	NA	NA
A1BN54	Actn1	Alpha-actinin cytoskeletal isoform	NA	NA	NA	NA	NA	NA	36	39	36	NA	NA	NA
A1E281	Actb	Beta-actin (Fragment)	NA	NA	NA	NA	NA	17	NA	NA	NA	NA	NA	NA
A1E2B8	Inducible heat shock protein 70	Inducible heat shock protein 70	NA	NA	NA	NA	NA	NA	25	NA	18	NA	NA	NA
A1L013	Cactin	Cactin	NA	NA	NA	NA	NA	NA	NA	NA	NA	NA	NA	1
A1L0U6	Nckap1	Nckap1 protein (Fragment)	NA	NA	NA	NA	NA	NA	2	NA	NA	NA	NA	NA
A1L0X5	Krt78	Krt78 protein (Fragment)	1	NA	NA	2	NA	NA	1	NA	NA	1	NA	NA
A1L3B8	Psmd7	Proteasome (Prosome, macropain) 26S subunit, non-ATPase, 7	NA	NA	NA	NA	NA	NA	NA	2	1	NA	NA	NA
A2A3U8	Lonrf3	LON peptidase N-terminal domain and RING finger protein 3 (Fragment)	NA	NA	NA	NA	NA	NA	NA	NA	1	NA	NA	NA
A2A442	Scube1	Signal peptide, CUB and EGF-like domain-containing protein 1	NA	NA	NA	NA	NA	NA	3	NA	NA	NA	NA	NA
A2A473	Tox2	TOX high mobility group box family member 2	NA	NA	NA	NA	NA	NA	1	NA	NA	NA	NA	NA
A2A4E2	Fam90a1a	Family with sequence similarity 90, member A1A	NA	NA	NA	NA	NA	NA	NA	NA	NA	1	NA	NA
A2A4J3	Psme3	Proteasome activator complex subunit 3 (Fragment)	NA	NA	NA	NA	NA	NA	NA	1	NA	NA	NA	NA
A2A513	Krt10	Keratin, type I cytoskeletal 10	71	32	26	23	15	25	22	15	14	NA	NA	4
A2A547	Rpl19	Ribosomal protein L19	NA	NA	NA	1	NA	NA	3	4	4	25	25	23
A2A5K3	Pltp	Phospholipid transfer protein (Fragment)	NA	NA	NA	NA	NA	NA	NA	3	1	NA	NA	NA
A2A5N1	Ywhab	14-3-3 protein beta/alpha (Fragment)	NA	NA	NA	NA	NA	NA	NA	2	5	NA	NA	NA
A2A5R4	Znfx1	NFX1-type zinc finger-containing protein 1 (Fragment)	NA	NA	NA	NA	NA	1	NA	1	NA	NA	1	NA
A2A6D9	Cdk5rap3	CDK5 regulatory subunit-associated protein 3 (Fragment)	NA	NA	NA	NA	NA	NA	NA	1	NA	NA	NA	NA
A2A7S7	Yars	Tyrosine--tRNA ligase	NA	NA	NA	NA	NA	NA	NA	1	NA	NA	NA	NA
A2A8T1	Cyp4a32	Cytochrome P450, family 4, subfamily a, polypeptide 32	NA	NA	NA	NA	NA	NA	2	NA	NA	NA	NA	NA
A2A934	Prdm16	Histone-lysine N-methyltransferase PRDM16	NA	NA	NA	NA	NA	NA	NA	2	6	1	NA	NA
A2A9R5	Elavl4	ELAV-like protein 4 (Fragment)	NA	NA	NA	NA	NA	NA	NA	1	NA	NA	NA	NA
A2A9T1	Tbkbp1	TANK-binding kinase 1-binding protein 1 (Fragment)	NA	NA	NA	NA	NA	NA	15	9	7	54	24	15
A2A9Y7	Cyp4x1	Cytochrome P450 4X1	NA	NA	NA	NA	NA	NA	NA	NA	NA	1	NA	NA
A2AA59	Jade2	E3 ubiquitin-protein ligase Jade-2	NA	NA	NA	NA	NA	NA	2	NA	NA	NA	NA	NA
A2AC19	Suv39h1	Histone-lysine N-methyltransferase	NA	NA	NA	NA	NA	NA	NA	1	NA	NA	NA	NA
A2AC60	D630003M21Rik	RIKEN cDNA D630003M21 gene	NA	NA	NA	NA	NA	NA	NA	NA	1	NA	NA	NA
A2ADM8	Zfp831	Zinc finger protein 831	NA	NA	NA	NA	NA	NA	NA	NA	1	NA	NA	NA
A2ADS8	Patj	InaD-like protein	NA	NA	NA	NA	NA	NA	1	NA	NA	NA	NA	NA
A2AEP5	Abca5	ATP-binding cassette sub-family A member 5 (Fragment)	NA	NA	NA	NA	NA	NA	NA	NA	1	NA	NA	NA
A2AF82	Ahsa2	Activator of 90 kDa heat shock protein ATPase homolog 2 (Fragment)	NA	NA	NA	NA	NA	NA	NA	1	NA	NA	NA	NA
A2AFI9	Rbbp7	Histone-binding protein RBBP7	NA	NA	NA	NA	NA	NA	4	NA	1	NA	NA	NA
A2AFQ0	Huwe1	HECT-type E3 ubiquitin transferase	NA	NA	NA	NA	NA	NA	NA	1	4	NA	1	NA
A2AFS0	Sars	Seryl-tRNA synthetase (Fragment)	NA	NA	NA	NA	NA	NA	NA	NA	NA	1	NA	NA
A2AFS1	Sars	Seryl-aminoacyl-tRNA synthetase (Fragment)	NA	NA	NA	NA	NA	NA	1	NA	NA	NA	NA	NA
A2AGL8	Rnf128	E3 ubiquitin-protein ligase RNF128	NA	NA	NA	NA	NA	NA	1	NA	NA	NA	NA	NA
A2AGN7	Psmc3	26S proteasome regulatory subunit 6A	NA	NA	NA	NA	NA	NA	NA	15	13	NA	NA	7
A2AGW4	Pcdh19	Protocadherin-19 (Fragment)	NA	NA	NA	NA	NA	NA	1	NA	NA	NA	NA	NA
A2AHM8	Olfr1320	Olfactory receptor	NA	NA	NA	NA	NA	NA	1	NA	NA	NA	NA	NA
A2AI62	Heph	Hephaestin	NA	NA	NA	NA	NA	NA	NA	1	NA	NA	NA	NA
A2AI76	Klhl34	Kelch-like 34	NA	NA	NA	NA	NA	NA	6	2	1	1	1	NA
A2AI91	Phka1	Phosphorylase b kinase regulatory subunit	NA	NA	NA	NA	NA	NA	1	NA	NA	NA	NA	NA
A2AL13	Hnrnpa3	Heterogeneous nuclear ribonucleoprotein A3 (Fragment)	NA	NA	NA	NA	NA	NA	NA	1	NA	NA	NA	NA
A2ALA0	Surf6	Surfeit locus protein 6	NA	NA	NA	NA	NA	NA	NA	NA	1	NA	NA	NA
A2ALB1	Rexo4	RNA exonuclease 4 (Fragment)	NA	NA	NA	NA	NA	NA	NA	NA	NA	NA	1	NA
A2ALV7	Ecpas	Proteasome adapter and scaffold protein ECM29 (Fragment)	NA	NA	NA	NA	NA	NA	4	NA	1	NA	NA	NA
A2AM67	Sh2d5	Vascular SH2 domain-containing protein	NA	NA	NA	NA	NA	NA	1	NA	NA	NA	NA	NA
A2AMN2	Bend7	BEN domain-containing protein 7	NA	NA	NA	NA	NA	NA	1	NA	NA	NA	NA	NA
A2ANQ2	Adra1d	Alpha-1D adrenergic receptor	NA	NA	NA	NA	NA	NA	3	NA	NA	NA	NA	NA
A2ANX6	Slc27a2	Very long-chain acyl-CoA synthetase	NA	NA	NA	NA	NA	NA	NA	NA	NA	NA	NA	1
A2APD7	Nop56	Nucleolar protein 56 (Fragment)	NA	NA	NA	NA	NA	NA	NA	NA	1	NA	NA	NA
A2AQ50	Slc12a1	Solute carrier family 12 member 1	NA	NA	NA	NA	NA	NA	NA	1	NA	NA	NA	NA
A2AQE4	Cops2	COP9 signalosome complex subunit 2	NA	NA	NA	NA	NA	NA	4	NA	2	NA	NA	NA
A2ARU0	Lcmt2	tRNA wybutosine-synthesizing protein 4	NA	NA	NA	NA	NA	NA	NA	2	1	NA	NA	NA
A2ARV7	Gm14401	Predicted gene 14401	NA	NA	NA	NA	NA	NA	NA	NA	1	NA	NA	NA
A2ASW8	Rapgef4	Rap guanine nucleotide exchange factor 4	NA	NA	NA	NA	NA	NA	NA	NA	1	NA	NA	NA
A2ATN9	Nek6	Serine/threonine-protein kinase Nek6	NA	NA	NA	NA	NA	NA	NA	NA	1	NA	NA	NA
A2ATQ5	Anapc1	Anaphase-promoting complex subunit 1	NA	NA	NA	NA	NA	NA	NA	NA	1	NA	NA	NA
A2ATU9	Hat1	Histone acetyltransferase type B catalytic subunit	NA	NA	NA	NA	NA	NA	NA	5	2	NA	NA	NA
A2AU83	Gm14124	Predicted gene 14124	NA	NA	NA	NA	NA	NA	NA	1	NA	NA	NA	NA
A2AVE4	Rhbdf1	Inactive rhomboid protein 1 (Fragment)	NA	NA	NA	NA	NA	NA	NA	NA	NA	1	3	NA
A2AVP4	Rc3h2	RING-type E3 ubiquitin transferase	NA	NA	NA	NA	NA	NA	NA	NA	NA	NA	NA	1
A2AW40	Hnrnpr	Heterogeneous nuclear ribonucleoprotein R (Fragment)	NA	NA	NA	NA	NA	NA	NA	1	NA	NA	NA	NA
A2AWQ2	Rcc2	Protein RCC2 (Fragment)	NA	NA	NA	NA	NA	NA	NA	2	NA	NA	NA	NA
A2BGJ5	Zmynd12	Zinc finger, MYND domain-containing 12	NA	NA	NA	NA	NA	NA	1	NA	NA	NA	NA	NA
A2BI49	Xlr5b	X-linked lymphocyte-regulated 5B (Fragment)	NA	NA	NA	NA	NA	NA	NA	NA	1	NA	NA	NA
A2CFB8	Gp1ba	Glycoprotein 1b, alpha polypeptide	NA	NA	NA	NA	NA	NA	1	6	2	NA	NA	1
A2JY28	Mep	Ephrin type A receptor	NA	NA	NA	NA	NA	NA	NA	2	NA	NA	NA	NA
A2RS22	Coro1b	Coronin	NA	NA	NA	NA	NA	NA	NA	NA	1	NA	NA	NA
A2RSF4	Sesn3	Sestrin 3	NA	NA	NA	NA	NA	NA	NA	NA	1	NA	NA	NA
A2RST7	Vmn1r9	Vomeronasal type-1 receptor	NA	NA	NA	NA	NA	NA	NA	NA	NA	NA	NA	2
A2RSW6	Amt	Aminomethyltransferase	NA	NA	NA	NA	NA	NA	NA	3	NA	NA	NA	NA
A2RTH4	Cryge	Crystallin, gamma E	NA	NA	NA	2	1	NA	26	50	11	NA	NA	NA
A2VDF8	Dync1li1	Dynein light intermediate chain (Fragment)	NA	NA	NA	NA	NA	NA	NA	NA	2	NA	1	1
A3KG36	G6pdx	Glucose-6-phosphate 1-dehydrogenase (Fragment)	NA	NA	NA	NA	NA	NA	NA	NA	1	NA	NA	NA
A3KGU5	Sptan1	Spectrin alpha chain, non-erythrocytic 1	NA	NA	NA	NA	NA	NA	28	58	39	NA	NA	NA
A3KML3	Ywhaq	14-3-3 protein theta	NA	NA	1	NA	NA	NA	7	9	21	NA	2	5
A3RLD4	Crygc	Gamma-C-crystallin	NA	NA	1	1	2	NA	36	31	12	NA	NA	NA
A4FUS1	Rps16	Rps16 protein	NA	NA	NA	1	NA	NA	5	26	3	44	21	27
A4IF60	Rhou	Rhou protein (Fragment)	NA	NA	NA	NA	NA	NA	NA	NA	1	NA	NA	NA
A4PBT3	Rnf125	RING-type E3 ubiquitin transferase	NA	NA	NA	NA	NA	NA	NA	NA	1	NA	NA	NA
A5JUZ1	Ubc	Ubiqutin subunit 1 (Fragment)	NA	NA	NA	NA	NA	NA	NA	NA	NA	61	NA	NA
A6H6D5	Msh4	MutS homolog 4 (E. coli)	NA	NA	NA	NA	1	NA	NA	NA	NA	NA	NA	NA
A6H6H9	Rai1	Rai1 protein	NA	NA	NA	NA	NA	NA	NA	1	1	NA	NA	NA
A6MDD3	Cd109	CD109 antigen	NA	NA	NA	NA	NA	NA	22	25	9	1	1	1
A6PWC3	Nrd1	Nardilysin, N-arginine dibasic convertase, NRD convertase 1	NA	NA	NA	NA	NA	NA	NA	NA	8	NA	NA	NA
A6PWR8	Usp43	Ubiquitin carboxyl-terminal hydrolase 43	NA	NA	NA	NA	NA	NA	NA	NA	NA	NA	NA	1
A6ZI46	Aldoart1	Fructose-bisphosphate aldolase	NA	NA	NA	NA	NA	NA	NA	6	NA	NA	NA	NA
A7TU71	Shroom2	Protein Shroom2	NA	NA	NA	NA	NA	NA	NA	1	NA	NA	NA	NA
A7XUT9	Kcnq5	Voltage-gated potassium channel type Kv7.5 (Fragment)	NA	NA	NA	NA	NA	NA	2	NA	NA	NA	NA	NA
A8DUV1	Hbat1	Alpha-globin	NA	NA	NA	2	NA	NA	NA	NA	NA	2	NA	NA
A8IP69	Ywhag	14-3-3 protein gamma subtype	NA	NA	NA	NA	NA	NA	NA	NA	5	NA	NA	NA
A8VI09	Carf	Calcium-responsive transcription factor	NA	NA	NA	NA	NA	NA	1	NA	NA	NA	NA	NA
A8Y5J3	Ints11	Cleavage and polyadenylation-specific factor 3-like protein	NA	NA	NA	NA	NA	NA	NA	1	NA	NA	1	NA
A8Y5J8	Txlna	Alpha-taxilin (Fragment)	NA	NA	NA	NA	NA	NA	3	NA	NA	NA	NA	NA
B0LAC5	Atic	AICAR transformylase/inosine monophosphate cyclohydrolase (Fragment)	NA	NA	NA	NA	NA	NA	2	4	NA	NA	NA	NA
B0QZZ9	Rusc2	Iporin (Fragment)	NA	NA	NA	NA	NA	NA	NA	NA	1	NA	NA	NA
B0R058	Gpcpd1	Glycerophosphocholine phosphodiesterase GPCPD1	NA	NA	NA	NA	NA	NA	1	NA	NA	NA	NA	NA
B0R1E3	Hint1	Histidine triad nucleotide-binding protein 1	NA	NA	NA	NA	NA	NA	NA	1	2	NA	NA	NA
B0V2N8	Anxa2	Annexin (Fragment)	NA	NA	NA	NA	NA	NA	NA	NA	NA	NA	NA	1
B1AS46	Casz1	Zinc finger protein castor homolog 1	NA	NA	NA	NA	NA	NA	NA	NA	NA	1	NA	NA
B1ASX6	Alox8	Polyunsaturated fatty acid lipoxygenase ALOX8	NA	NA	NA	NA	NA	NA	NA	NA	1	NA	NA	NA
B1AT36	Psmd12	26S proteasome non-ATPase regulatory subunit 12	NA	NA	NA	NA	NA	NA	NA	16	23	NA	2	6
B1AUX2	Hcfc1	Host cell factor 1	NA	NA	NA	NA	NA	NA	NA	NA	4	NA	NA	NA
B1AUY9	Naa10	N-alpha-acetyltransferase 10	NA	NA	NA	NA	NA	NA	NA	NA	NA	NA	NA	1
B1AVH0	Mmp16	Matrix metalloproteinase-16 (Fragment)	NA	NA	NA	NA	NA	NA	NA	NA	1	NA	NA	NA
B1AVU7	AAdacl4fm3	AADACL4 family member 3	NA	NA	NA	NA	NA	NA	NA	NA	1	NA	NA	NA
B1AWE0	Clta	Clathrin light chain	NA	NA	NA	NA	NA	NA	1	NA	1	NA	NA	NA
B1AWT7	Ube2j1	Ubiquitin-conjugating enzyme E2 J1 (Fragment)	NA	NA	NA	NA	NA	NA	NA	1	NA	NA	NA	NA
B1AXE9	Amot	Angiomotin (Fragment)	NA	NA	NA	NA	NA	NA	NA	NA	NA	NA	1	NA
B1AXW5	Prdx1	Peroxiredoxin-1 (Fragment)	NA	NA	NA	NA	NA	NA	1	2	NA	1	NA	2
B1AZF9	Aatk	Serine/threonine-protein kinase LMTK1	NA	NA	NA	NA	NA	NA	1	NA	NA	NA	NA	NA
B1B0C7	Hspg2	Basement membrane-specific heparan sulfate proteoglycan core protein	NA	NA	NA	NA	9	5	89	99	139	71	51	151
B2CY77	Rpsa	Laminin receptor (Fragment)	NA	NA	NA	NA	NA	NA	120	113	80	54	21	18
B2KF55	Ube2v2	Ubiquitin-conjugating enzyme E2 variant 2	NA	NA	NA	NA	NA	NA	1	NA	3	1	NA	NA
B2KF83	Mthfs	5-formyltetrahydrofolate cyclo-ligase	NA	NA	NA	NA	NA	NA	NA	1	NA	NA	NA	NA
B2RPX1	Iqcd	Dynein regulatory complex protein 10	NA	NA	NA	NA	NA	NA	NA	2	NA	NA	NA	NA
B2RQ56	Mlxip	MLX-interacting protein	NA	NA	NA	NA	NA	NA	NA	NA	NA	NA	1	NA
B2RQA7	Ncapg	Ncapg protein	NA	NA	NA	NA	NA	NA	NA	3	1	NA	NA	NA
B2RQC7	Dip2b	DIP2 disco-interacting protein 2 homolog B (Drosophila)	NA	NA	NA	NA	1	NA	NA	NA	NA	NA	NA	NA
B2RQQ5	Map1b	Microtubule-associated protein 1B	NA	NA	NA	NA	NA	NA	NA	2	1	1	NA	NA
B2RQQ8	Col4a2	Collagen, type IV, alpha 2	NA	NA	NA	NA	NA	NA	NA	1	NA	NA	NA	NA
B2RRH9	Gmps	Glutamine amidotransferase	NA	NA	NA	NA	NA	NA	1	1	1	NA	NA	NA
B2RRM8	Syndig1l	Transmembrane protein 90a	NA	NA	NA	NA	NA	NA	NA	1	NA	NA	NA	NA
B2RRX1	Actb	Actin, beta	8	21	7	NA	NA	NA	881	958	887	547	715	725
B2RRY4	Mpp5	MAGUK p55 subfamily member 5	NA	NA	NA	NA	NA	NA	5	4	1	NA	NA	NA
B2RS82	Chit1	Chitinase	NA	NA	NA	NA	NA	NA	1	NA	NA	NA	NA	NA
B2RSN3	Tubb2b	Tubulin beta chain	NA	NA	NA	NA	NA	NA	124	NA	76	35	24	57
B2RSV4	Sf3b3	Splicing factor 3b, subunit 3	NA	NA	NA	NA	NA	NA	35	21	30	1	NA	NA
B2RT97	Psmd13	26S proteasome non-ATPase regulatory subunit 13	NA	NA	NA	NA	NA	NA	NA	8	4	NA	NA	5
B2RTM0	Hist2h4	Histone H4	NA	NA	NA	NA	NA	NA	NA	3	NA	NA	NA	NA
B2RTP7	Krt2	Krt2 protein	NA	2	20	NA	2	1	NA	NA	NA	NA	NA	NA
B2RU72	Krt27	Keratin 27	NA	NA	NA	NA	NA	NA	NA	NA	NA	1	NA	NA
B2RUC7	Strap	Serine/threonine kinase receptor associated protein	NA	NA	NA	NA	NA	NA	8	17	27	NA	1	2
B2RUG2	Mib2	RING-type E3 ubiquitin transferase	NA	1	NA	NA	NA	NA	NA	NA	NA	NA	NA	NA
B2RUQ2	Usf3	Gene model 608, (NCBI)	NA	NA	1	NA	NA	NA	NA	NA	NA	NA	NA	NA
B2RWT8	Ppargc1b	Peroxisome proliferative activated receptor, gamma, coactivator 1 beta	NA	NA	NA	NA	NA	NA	NA	NA	1	NA	NA	NA
B2RWU4	Cobl	Cordon-bleu	NA	NA	NA	NA	NA	NA	NA	NA	NA	1	NA	NA
B2RWV6	Styk1	Serine/threonine/tyrosine kinase 1	NA	NA	NA	NA	NA	NA	NA	NA	1	NA	NA	NA
B2RWW8	Myh8	Myosin, heavy polypeptide 8, skeletal muscle, perinatal	NA	NA	NA	NA	NA	NA	NA	1	NA	NA	NA	NA
B2RWW9	Crybg2	Absent in melanoma 1-like	NA	NA	NA	NA	NA	NA	NA	NA	NA	1	NA	NA
B2RWX5	Cep250	Centrosomal protein 250	NA	NA	NA	NA	NA	NA	NA	NA	1	NA	NA	NA
B2RX13	Pxdn	Peroxidase	NA	NA	NA	NA	NA	NA	130	NA	NA	NA	NA	NA
B2RX57	4930415L06Rik	4932429P05Rik protein	NA	NA	NA	NA	NA	NA	NA	NA	1	NA	NA	NA
B2RXE2	Slc9a5	Sodium/hydrogen exchanger	1	NA	NA	NA	NA	NA	NA	NA	NA	NA	NA	NA
B2RXS8	Ptprz1	Protein-tyrosine-phosphatase	NA	NA	NA	NA	NA	NA	NA	NA	NA	1	NA	NA
B2RY11	Abca12	Abca12 protein	NA	NA	NA	NA	NA	NA	NA	NA	1	NA	NA	NA
B2RY58	Hcn4	Hyperpolarization-activated, cyclic nucleotide-gated K+ 4	NA	NA	NA	NA	NA	NA	NA	NA	NA	1	NA	NA
B2WTN8	rpB2	DNA-directed RNA polymerase (Fragment)	NA	NA	NA	NA	NA	NA	1	NA	NA	NA	NA	NA
B2Z894	Gm29427	6-phosphofructo-2-kinase	NA	NA	NA	NA	NA	NA	NA	1	NA	NA	NA	NA
B2Z895	Pfkfb2	6-phosphofructo-2-kinase	NA	NA	NA	NA	NA	NA	1	NA	NA	NA	NA	NA
B3DFI9	Ubr3	E3 ubiquitin-protein ligase (Fragment)	NA	NA	1	NA	NA	NA	NA	NA	NA	NA	NA	NA
B3Y5T0	Hrh1	Histamine H1 receptor	NA	NA	NA	NA	NA	NA	NA	NA	NA	NA	1	NA
B5APU1	C3	Complement component 3d (Fragment)	NA	NA	NA	NA	NA	NA	63	57	55	NA	NA	NA
B6VGH4	Cyp1a2	Hydroperoxy icosatetraenoate dehydratase	NA	NA	NA	NA	NA	NA	1	NA	NA	NA	NA	NA
B7FAV1	Flna	Filamin, alpha (Fragment)	NA	NA	NA	NA	NA	NA	4	7	12	NA	NA	NA
B7ZCN3	Cep250	Centrosome-associated protein CEP250 (Fragment)	NA	NA	NA	NA	NA	NA	3	1	NA	NA	NA	NA
B7ZCR6	Zfp512b	Zinc finger protein 512B	NA	NA	NA	NA	NA	NA	NA	NA	1	NA	NA	NA
B7ZD24	Aar2	Protein AAR2 homolog (Fragment)	NA	NA	NA	NA	NA	NA	NA	2	NA	NA	NA	NA
B7ZD25	Aar2	AAR2 splicing factor homolog (Fragment)	NA	NA	NA	NA	NA	NA	1	NA	NA	NA	NA	NA
B7ZMQ9	Inpp4a	Inpp4a protein	NA	NA	NA	NA	NA	NA	NA	NA	NA	NA	1	NA
B7ZN02	Jcad	Uncharacterized protein	NA	NA	NA	NA	NA	NA	1	NA	NA	NA	NA	NA
B7ZNJ1	Fn1	Fibronectin	NA	NA	NA	NA	NA	NA	260	254	141	229	NA	NA
B7ZNQ5	Itlnb	Intelectin 5	NA	NA	NA	NA	NA	NA	NA	1	NA	NA	NA	NA
B7ZNX0	Aff4	Aff4 protein	NA	NA	NA	NA	NA	NA	NA	NA	1	NA	NA	NA
B7ZP20	Ankfy1	Ankyrin repeat and FYVE domain containing 1	NA	NA	NA	NA	NA	NA	NA	2	NA	NA	NA	NA
B7ZP47	Wapl	Wapal protein	NA	NA	NA	NA	NA	NA	NA	NA	NA	1	NA	NA
B7ZWC0	Ndrg1	N-myc downstream-regulated gene 1 protein	NA	NA	NA	NA	NA	NA	NA	NA	2	NA	NA	NA
B7ZWL1	Cnot1	CCR4-NOT transcription complex subunit 1	NA	NA	NA	NA	NA	NA	NA	3	NA	NA	NA	NA
B8JJG9	Tfg	Trk-fused gene (Fragment)	NA	NA	NA	NA	NA	NA	NA	1	NA	NA	NA	NA
B8JK85	Amotl2	Angiomotin-like protein 2 (Fragment)	NA	NA	NA	NA	NA	NA	2	NA	1	1	NA	1
B8JKK2	Rpl15	Ribosomal protein L15 (Fragment)	NA	NA	NA	NA	NA	NA	NA	NA	NA	1	5	NA
B8QRJ2	Cdh23	Cadherin 23 isoform F (Fragment)	NA	NA	NA	NA	NA	NA	1	NA	NA	NA	NA	NA
B9EHN0	Uba1	Ubiquitin-activating enzyme E1	NA	NA	1	NA	NA	NA	121	106	110	11	3	9
B9EIE9	Adss	Adenylosuccinate synthetase isozyme 2	NA	NA	NA	NA	NA	NA	2	NA	NA	NA	NA	NA
B9EIU1	Eprs	Glutamyl-tRNA synthetase	NA	NA	NA	NA	NA	NA	39	69	49	5	6	13
B9EIV1	Kcnj10	Kcnj10 protein	NA	NA	NA	NA	NA	NA	NA	NA	NA	NA	NA	1
B9EJ16	Myocd	Myocd protein	NA	NA	NA	NA	NA	NA	1	NA	NA	NA	NA	NA
B9EJ30	Ltk	Tyrosine-protein kinase receptor	NA	NA	NA	NA	NA	NA	NA	NA	NA	NA	NA	1
B9EJ37	Sh3pxd2b	SH3 and PX domains 2B	NA	NA	NA	1	NA	NA	NA	NA	1	NA	NA	NA
B9EJA5	Vwa7	D17H6S56E-3 protein	NA	NA	NA	NA	NA	NA	2	NA	NA	NA	NA	NA
B9EK89	Camta1	Camta1 protein	NA	NA	1	NA	NA	NA	NA	NA	NA	NA	NA	NA
B9EK93	Irs4	Insulin receptor substrate 4	NA	NA	NA	NA	NA	NA	NA	NA	1	NA	NA	NA
B9EKB0	Lamb1	Laminin B1 subunit 1	NA	NA	NA	NA	NA	NA	NA	11	9	7	9	16
B9EKG1	Ccdc92b	Uncharacterized protein	NA	NA	NA	NA	NA	NA	1	NA	NA	NA	NA	NA
B9EKJ4	Yeats2	Yeats2 protein	NA	NA	NA	NA	NA	NA	NA	NA	NA	1	NA	NA
C6KI94	Cnnm3	Cyclin-like protein 3	NA	NA	NA	NA	NA	NA	NA	NA	1	NA	NA	NA
D0EPX6	Pparg	Peroxisome proliferator-activated receptor gamma (Fragment)	NA	NA	NA	NA	NA	NA	NA	1	NA	NA	NA	NA
D0ESZ6	Serpine1	Serine or cysteine peptidase inhibitor clade E member 1 (Fragment)	NA	NA	NA	NA	NA	NA	1	NA	NA	NA	NA	NA
D2KHZ9	Gapdh	Glyceraldehyde-3-phosphate dehydrogenase	NA	NA	NA	NA	NA	NA	NA	NA	105	NA	NA	NA
D2YW38	MHC	MHC	NA	NA	NA	NA	NA	NA	NA	NA	NA	5	NA	NA
D3YTR2	Reep6	Receptor expression-enhancing protein 6	NA	NA	NA	2	NA	NA	NA	NA	NA	NA	NA	NA
D3YU08	Synpo2l	Synaptopodin 2-like protein	NA	NA	NA	NA	NA	NA	NA	NA	NA	NA	NA	1
D3YU40	Igfbp2	Insulin-like growth factor-binding protein 2	NA	NA	NA	NA	1	NA	NA	NA	NA	NA	NA	NA
D3YUZ4	Crebzf	CREB/ATF bZIP transcription factor (Fragment)	NA	NA	NA	NA	NA	NA	NA	1	NA	NA	NA	NA
D3YV25	Arf3	ADP-ribosylation factor 3 (Fragment)	NA	NA	NA	NA	NA	NA	NA	1	1	NA	NA	NA
D3YVB4	Rps15a	40S ribosomal protein S15a (Fragment)	NA	NA	NA	NA	NA	NA	2	NA	1	1	NA	NA
D3YVJ7	Akr1b3	Aldo-keto reductase family 1, member B3 (aldose reductase) (Fragment)	NA	NA	NA	NA	NA	NA	NA	NA	2	NA	NA	NA
D3YVM5	Rplp0	60S acidic ribosomal protein P0 (Fragment)	NA	NA	NA	NA	NA	NA	NA	NA	NA	NA	NA	4
D3YVW3	Tbc1d14	TBC1 domain family member 14 (Fragment)	NA	NA	NA	NA	NA	NA	1	NA	NA	NA	NA	NA
D3YW26	Tada2b	Transcriptional adaptor 2B	NA	NA	NA	NA	NA	NA	NA	NA	NA	1	NA	NA
D3YWF6	Otub1	Ubiquitinyl hydrolase 1	NA	NA	NA	NA	NA	NA	NA	5	NA	NA	NA	NA
D3YWF9	Ddx47	Probable ATP-dependent RNA helicase DDX47 (Fragment)	NA	NA	NA	NA	NA	NA	NA	NA	1	NA	NA	NA
D3YWH0	Pcolce	Procollagen C-endopeptidase enhancer 1 (Fragment)	NA	NA	NA	NA	NA	NA	1	NA	NA	NA	NA	NA
D3YWK1	Wipi2	WD repeat domain phosphoinositide-interacting protein 2	NA	NA	NA	NA	NA	NA	NA	NA	NA	1	NA	NA
D3YX34	Dctn1	Dynactin subunit 1	NA	NA	NA	NA	NA	NA	1	6	1	2	NA	4
D3YXF4	Ywhaz	14-3-3 protein zeta/delta (Fragment)	NA	NA	NA	NA	NA	NA	NA	NA	NA	NA	NA	1
D3YXP6	Pmvk	Phosphomevalonate kinase	NA	NA	NA	NA	NA	NA	NA	NA	1	NA	NA	NA
D3YXZ9	Shc1	SHC-transforming protein 1 (Fragment)	NA	NA	NA	NA	NA	NA	NA	NA	1	NA	NA	NA
D3YYE0	Gfpt1	Glutamine--fructose-6-phosphate aminotransferase [isomerizing] 1	NA	NA	NA	NA	NA	NA	1	NA	NA	NA	NA	NA
D3YYK8	Mapre2	Microtubule-associated protein RP/EB family member 2 (Fragment)	NA	NA	1	1	NA	NA	NA	NA	NA	NA	NA	NA
D3YYM6	Rps5	40S ribosomal protein S5 (Fragment)	NA	NA	NA	NA	NA	NA	1	1	1	6	4	6
D3YYN7	Atp1a2	Sodium/potassium-transporting ATPase subunit alpha	NA	4	2	NA	NA	1	NA	NA	NA	NA	7	NA
D3YYW5	Crybb3	Beta-B3 crystallin (Fragment)	NA	NA	NA	1	NA	NA	NA	NA	NA	NA	NA	NA
D3YZD3	Afap1l2	Actin filament-associated protein 1-like 2 (Fragment)	NA	NA	NA	NA	NA	NA	NA	NA	NA	NA	NA	1
D3YZJ1	Sqstm1	Sequestosome-1	NA	NA	NA	NA	NA	NA	2	NA	1	1	NA	NA
D3YZW1	Srgap1	SLIT-ROBO Rho GTPase-activating protein 1	NA	NA	NA	NA	NA	NA	NA	NA	NA	1	NA	NA
D3Z061	Uba6	E1 ubiquitin-activating enzyme	NA	NA	NA	NA	NA	NA	1	1	1	NA	NA	NA
D3Z069	Phldb2	Pleckstrin homology-like domain family B member 2 (Fragment)	NA	NA	NA	NA	NA	NA	NA	NA	NA	NA	NA	1
D3Z0B2	Zc3hc1	Nuclear-interacting partner of ALK	NA	NA	NA	NA	NA	NA	NA	1	NA	NA	NA	NA
D3Z0B3	Acacb	Acetyl-CoA carboxylase 2 (Fragment)	NA	NA	NA	NA	NA	NA	NA	NA	NA	NA	4	NA
D3Z0G0	Nif3l1	NIF3-like protein 1	NA	NA	NA	NA	NA	NA	NA	4	NA	NA	NA	NA
D3Z0S0	Cops7a	COP9 signalosome complex subunit 7a (Fragment)	NA	NA	NA	NA	NA	NA	1	NA	NA	NA	NA	NA
D3Z0W0	Arid5a	AT-rich interactive domain-containing protein 5A	NA	NA	NA	NA	NA	NA	1	NA	NA	NA	NA	NA
D3Z114	Pdzk1	Na(+)/H(+) exchange regulatory cofactor NHE-RF3 (Fragment)	NA	NA	NA	1	NA	NA	NA	NA	NA	NA	NA	NA
D3Z132	Thoc6	THO complex subunit 6 homolog	NA	NA	NA	NA	NA	NA	NA	NA	1	NA	NA	NA
D3Z1A9	Cbx3	Chromobox protein homolog 3	NA	NA	NA	NA	NA	NA	1	NA	NA	NA	NA	NA
D3Z1E6	Adam10	Disintegrin and metalloproteinase domain-containing protein 10 (Fragment)	NA	NA	NA	NA	NA	NA	NA	NA	NA	2	NA	NA
D3Z1F2	Cluap1	Clusterin-associated protein 1 (Fragment)	NA	NA	NA	NA	NA	NA	NA	1	NA	NA	NA	NA
D3Z1M1	Gnb2	Guanine nucleotide-binding protein G(I)/G(S)/G(T) subunit beta-2 (Fragment)	NA	NA	NA	NA	NA	NA	NA	NA	1	NA	NA	NA
D3Z1R9	Cops4	COP9 signalosome complex subunit 4 (Fragment)	NA	NA	NA	NA	NA	NA	NA	1	NA	NA	NA	NA
D3Z1U1	Crybb3	Beta-B3 crystallin (Fragment)	NA	NA	NA	NA	NA	NA	NA	27	7	NA	NA	NA
D3Z217	Tpmt	Thiopurine S-methyltransferase (Fragment)	NA	NA	NA	NA	NA	NA	NA	1	NA	NA	NA	NA
D3Z233	Niban1	Protein Niban 1	NA	NA	NA	NA	NA	NA	NA	1	NA	NA	NA	NA
D3Z263	Rtca	RNA 3'-terminal phosphate cyclase (Fragment)	NA	NA	NA	NA	NA	NA	NA	NA	3	NA	NA	NA
D3Z2B2	Kng1	Kininogen-1 (Fragment)	NA	NA	NA	NA	NA	NA	NA	1	NA	NA	NA	NA
D3Z2L5	Crybb3	Beta-B3 crystallin (Fragment)	NA	NA	NA	NA	1	1	NA	NA	NA	NA	NA	NA
D3Z2T9	Cdk1	Cyclin-dependent kinase 1 (Fragment)	NA	NA	NA	NA	NA	NA	NA	NA	2	NA	NA	3
D3Z3F1	Fip1l1	FIP1-like 1 protein (Fragment)	NA	NA	NA	NA	NA	NA	NA	1	NA	NA	NA	NA
D3Z3I8	Eef1a1	Elongation factor 1-alpha 1 (Fragment)	NA	NA	1	NA	NA	NA	NA	NA	NA	NA	NA	NA
D3Z411	Uxs1	UDP-glucuronic acid decarboxylase 1 (Fragment)	NA	NA	NA	NA	NA	NA	NA	NA	1	NA	NA	1
D3Z4A4	Prdx2	Peroxiredoxin-2 (Fragment)	NA	NA	NA	NA	NA	NA	NA	NA	NA	1	NA	NA
D3Z4B0	Srsf11	Serine and arginine-rich-splicing factor 11 (Fragment)	NA	NA	NA	NA	NA	NA	1	NA	NA	NA	NA	NA
D3Z4D9	C2cd3	C2 domain-containing protein 3 (Fragment)	NA	NA	NA	1	NA	NA	NA	NA	NA	NA	NA	NA
D3Z510	Aldoa	Fructose-bisphosphate aldolase (Fragment)	NA	NA	NA	NA	NA	NA	NA	7	NA	NA	NA	1
D3Z556	Col18a1	Collagen alpha-1(XVIII) chain (Fragment)	NA	NA	NA	NA	1	NA	NA	NA	NA	NA	NA	NA
D3Z564	Tab2	TGF-beta-activated kinase 1 and MAP3K7-binding protein 2 (Fragment)	1	NA	NA	NA	NA	NA	NA	NA	NA	NA	NA	NA
D3Z5H5	Kmt2a	Histone-lysine N-methyltransferase 2A (Fragment)	NA	NA	NA	NA	NA	NA	NA	1	NA	NA	NA	NA
D3Z5I1	Zc3hav1	Zinc finger CCCH-type antiviral protein 1	1	NA	NA	NA	NA	NA	NA	NA	NA	NA	NA	NA
D3Z6F8	Dda1	DET1- and DDB1-associated protein 1	NA	NA	NA	NA	NA	NA	NA	NA	1	NA	NA	NA
D3Z6I8	Tpm3	Tropomyosin alpha-3 chain	NA	NA	NA	NA	NA	NA	NA	NA	NA	2	2	NA
D3Z6N3	Mcm7	DNA replication licensing factor MCM7	NA	NA	NA	NA	NA	NA	NA	12	11	NA	NA	NA
D3Z6P1	Paics	Phosphoribosylaminoimidazolesuccinocarboxamide synthase (Fragment)	NA	NA	NA	NA	NA	NA	NA	NA	NA	NA	NA	1
D3Z6X3	Pex3	Peroxisomal assembly protein PEX3	NA	NA	NA	NA	NA	NA	NA	NA	NA	NA	2	NA
D3Z730	Eif4e2	Eukaryotic translation initiation factor 4E type 2	NA	NA	NA	NA	NA	NA	1	NA	NA	NA	NA	NA
D3Z741	4930444G20Rik	RIKEN cDNA 4930444G20 gene	NA	NA	NA	NA	NA	NA	NA	1	NA	NA	NA	NA
D3Z765	Luc7l	Putative RNA-binding protein Luc7-like 1 (Fragment)	NA	NA	NA	NA	NA	NA	NA	NA	1	NA	NA	1
D3Z780	Eif2b4	Translation initiation factor eIF-2B subunit delta	NA	NA	NA	NA	NA	NA	NA	2	NA	NA	NA	NA
D3Z7D5	Col6a2	Collagen alpha-2(VI) chain	NA	NA	NA	NA	NA	NA	1	NA	NA	NA	NA	NA
D3Z7J9	Hspd1	60 kDa heat shock protein, mitochondrial (Fragment)	NA	NA	NA	NA	NA	NA	13	18	22	NA	NA	NA
D3Z7K0	Otub1	Ubiquitinyl hydrolase 1 (Fragment)	NA	NA	NA	NA	NA	NA	NA	NA	1	NA	NA	NA
D3Z7N2	Eef1d	Elongation factor 1-delta (Fragment)	NA	NA	NA	NA	NA	NA	2	1	NA	NA	NA	NA
D3Z7X0	Acad12	Acyl-Coenzyme A dehydrogenase family, member 12	NA	NA	NA	NA	NA	NA	NA	1	NA	NA	NA	NA
D5FLC2	Rfx6	DNA-binding protein RFX6	NA	NA	1	NA	NA	NA	NA	NA	NA	NA	NA	NA
D6RCU5	Abcc12	Multidrug resistance-associated protein 9	NA	NA	NA	NA	NA	NA	1	NA	NA	NA	NA	NA
D6RCV3	Gps1	COP9 signalosome complex subunit 1	NA	NA	1	NA	NA	NA	NA	NA	NA	NA	NA	NA
D6RDB5	Arhgap23	Rho GTPase-activating protein 23	1	NA	NA	NA	NA	NA	NA	NA	NA	NA	NA	NA
D6RDS6	Mtmr14	Myotubularin-related protein 14	NA	NA	NA	NA	1	NA	NA	NA	NA	NA	NA	NA
D6RE19	Aspdh	Putative L-aspartate dehydrogenase	NA	NA	NA	NA	NA	NA	2	NA	NA	NA	NA	NA
D6RFA7	Carm1	Coactivator-associated arginine methyltransferase 1	NA	NA	NA	NA	NA	NA	NA	1	NA	NA	NA	NA
D6RH40	Nfat5	Nuclear factor of-activated T-cells 5	NA	NA	NA	NA	NA	NA	1	NA	NA	NA	NA	NA
D6RH49	Rps27l	40S ribosomal protein S27	NA	NA	NA	NA	NA	NA	1	NA	1	NA	NA	NA
D6RHA2	Renbp	GlcNAc 2-epimerase	NA	NA	NA	NA	NA	NA	3	2	NA	NA	NA	NA
D6RI62	Asxl2	Putative Polycomb group protein ASXL2 (Fragment)	NA	NA	NA	NA	NA	NA	NA	1	1	NA	NA	NA
D9J302	Pdlim5	ENH isoform 1e	NA	NA	NA	NA	NA	NA	NA	1	NA	NA	NA	NA
E0CX32	Ccdc85a	Coiled-coil domain-containing protein 85A	NA	NA	NA	NA	NA	NA	NA	NA	1	NA	NA	NA
E0CXB1	Psma6	Proteasome endopeptidase complex	NA	NA	NA	NA	NA	NA	8	6	13	NA	NA	NA
E0CXE3	Cntn6	Contactin-6	NA	NA	NA	NA	NA	NA	NA	1	3	NA	NA	1
E0CXE7	Ctc1	CST complex subunit CTC1	NA	NA	NA	NA	NA	NA	NA	2	2	NA	NA	NA
E0CXZ5	Samhd1	Deoxynucleoside triphosphate triphosphohydrolase SAMHD1	NA	NA	NA	NA	NA	NA	NA	NA	2	NA	NA	NA
E0CY69	Tcf19	Transcription factor 19-like protein (Fragment)	NA	NA	NA	NA	NA	NA	NA	NA	2	NA	NA	NA
E0CYA3	Ephb3	Receptor protein-tyrosine kinase	NA	NA	NA	NA	NA	NA	1	NA	NA	1	NA	NA
E0CYN1	H3f3a	H3.3 histone A (Fragment)	NA	NA	NA	NA	NA	NA	NA	NA	NA	1	NA	NA
E0CYQ2	Nudcd2	NudC domain-containing protein 2	NA	NA	NA	NA	NA	NA	NA	1	NA	NA	NA	NA
E0CYU5	Mat2b	Methionine adenosyltransferase 2 subunit beta	NA	NA	NA	NA	NA	NA	1	NA	NA	NA	NA	NA
E0CZ27	H3f3a	Histone H3 (Fragment)	NA	NA	NA	NA	NA	NA	2	6	4	NA	NA	3
E0CZ69	Fgd4	FYVE, RhoGEF and PH domain-containing protein 4 (Fragment)	NA	NA	NA	NA	NA	NA	1	NA	NA	NA	NA	NA
E0CZA1	Cct5	T-complex protein 1 subunit epsilon (Fragment)	NA	NA	NA	1	NA	NA	11	14	8	6	2	6
E0CZA8	R3hcc1l	Coiled-coil domain-containing protein R3HCC1L (Fragment)	NA	NA	NA	NA	NA	NA	NA	NA	NA	NA	NA	1
E0CZB2	Tm7sf2	Delta(14)-sterol reductase TM7SF2	NA	NA	NA	NA	NA	NA	NA	NA	NA	NA	NA	1
E0CZD2	Rin2	Ras and Rab interactor 2 (Fragment)	NA	NA	NA	NA	NA	NA	NA	1	NA	NA	NA	NA
E0CZE0	Nae1	NEDD8-activating enzyme E1 regulatory subunit	NA	NA	NA	NA	NA	NA	NA	NA	1	1	NA	NA
E2IUN6	Sgo2b	Shugoshin-like 2B	NA	NA	NA	NA	NA	NA	NA	NA	NA	1	NA	NA
E9PAI8	Nkx1-2	Homeodomain protein Nkx-1.2T5.1 (Fragment)	NA	NA	NA	NA	NA	NA	NA	1	NA	NA	NA	NA
E9PU96	Urb1	Nucleolar pre-ribosomal-associated protein 1	NA	NA	NA	NA	NA	NA	1	NA	NA	NA	NA	NA
E9PUB7	Msto1	Protein misato homolog 1	NA	NA	NA	NA	NA	NA	NA	NA	NA	NA	1	NA
E9PUE7	Abr	Active breakpoint cluster region-related protein	NA	NA	NA	NA	NA	NA	NA	1	NA	NA	NA	NA
E9PUL4	Pde8b	Phosphodiesterase	NA	NA	NA	NA	NA	NA	NA	1	NA	NA	NA	NA
E9PUM3	Pygm	Alpha-1,4 glucan phosphorylase	NA	NA	NA	NA	NA	NA	1	NA	NA	NA	NA	NA
E9PVP1	Crybg1	Crystallin beta-gamma domain-containing 1	NA	NA	NA	NA	NA	NA	NA	5	NA	NA	NA	NA
E9PW24	Plec	Plectin (Fragment)	NA	NA	NA	NA	NA	NA	NA	NA	NA	NA	NA	1
E9PW69	Psma4	Proteasome subunit alpha type (Fragment)	NA	NA	NA	NA	NA	NA	NA	2	NA	NA	NA	NA
E9PW79	Ddr1	Epithelial discoidin domain-containing receptor 1	1	NA	NA	NA	NA	NA	NA	NA	NA	NA	NA	NA
E9PWE9	Syk	Tyrosine-protein kinase	NA	NA	NA	NA	NA	NA	NA	NA	1	NA	NA	NA
E9PWF0	Thbs3	Thrombospondin-3	NA	NA	NA	NA	NA	NA	5	5	17	NA	NA	NA
E9PWK7	Ephb4	Receptor protein-tyrosine kinase	NA	NA	NA	NA	NA	NA	NA	1	1	NA	NA	NA
E9PWL5	Tfdp2	Transcription factor	NA	NA	NA	NA	NA	NA	NA	NA	NA	2	4	2
E9PWM7	Gnb2	Guanine nucleotide-binding protein G(I)/G(S)/G(T) subunit beta-2	NA	NA	NA	NA	NA	NA	NA	2	NA	NA	NA	2
E9PXZ3	Itga10	Integrin, alpha 10	NA	NA	NA	NA	NA	NA	NA	NA	1	NA	NA	NA
E9PY08	Adamts1	A disintegrin and metalloproteinase with thrombospondin motifs 1 (Fragment)	NA	NA	NA	NA	NA	NA	NA	NA	NA	NA	NA	4
E9PY26	Blmh	Bleomycin hydrolase (Fragment)	NA	NA	NA	NA	NA	NA	1	10	1	NA	NA	NA
E9PY48	Ncaph2	Condensin-2 complex subunit H2	NA	NA	NA	NA	NA	NA	NA	1	NA	NA	NA	NA
E9PYF2	Adam10	Disintegrin and metalloproteinase domain-containing protein 10	NA	NA	NA	NA	NA	NA	1	NA	NA	NA	NA	NA
E9PYH2	Acot7	Cytosolic acyl coenzyme A thioester hydrolase	NA	NA	NA	NA	NA	NA	NA	2	NA	NA	NA	NA
E9PYJ6	Focad	Focadhesin	NA	NA	NA	NA	NA	NA	NA	NA	NA	NA	1	NA
E9PYJ7	Pitpnm2	Membrane-associated phosphatidylinositol transfer protein 2	NA	NA	NA	NA	NA	NA	NA	NA	NA	1	NA	NA
E9PYP8	Crybb1	Beta-B1 crystallin (Fragment)	NA	NA	12	NA	NA	NA	5	5	1	NA	NA	NA
E9PZ15	Pofut1	GDP-fucose protein O-fucosyltransferase 1	NA	NA	NA	NA	NA	NA	NA	1	NA	NA	NA	NA
E9PZ16	Hspg2	Basement membrane-specific heparan sulfate proteoglycan core protein	NA	NA	NA	14	NA	NA	NA	NA	NA	NA	NA	NA
E9PZ36	Pkhd1	Polycystic kidney and hepatic disease 1	NA	NA	NA	NA	NA	NA	NA	NA	NA	1	NA	NA
E9PZ38	Wnk4	Serine/threonine-protein kinase WNK4	NA	NA	NA	NA	NA	NA	NA	NA	NA	NA	NA	1
E9PZ87	Pappa2	Pappalysin 2	NA	NA	NA	NA	NA	NA	NA	1	NA	NA	NA	NA
E9Q039	Npepps	Aminopeptidase	NA	NA	NA	NA	NA	NA	9	NA	NA	NA	NA	NA
E9Q083	Il10rb	Interleukin-10 receptor subunit beta (Fragment)	NA	NA	NA	NA	NA	NA	1	NA	NA	NA	NA	NA
E9Q0A3	Arhgef11	Rho guanine nucleotide exchange factor (GEF) 11 (Fragment)	NA	NA	NA	NA	NA	NA	1	NA	NA	NA	NA	NA
E9Q0D1	Gapvd1	GTPase-activating protein and VPS9 domain-containing protein 1 (Fragment)	NA	NA	NA	NA	NA	NA	NA	2	NA	NA	NA	NA
E9Q0E7	Vmn2r115	Vomeronasal 2, receptor 115	NA	NA	NA	NA	NA	NA	NA	1	NA	NA	NA	NA
E9Q0F8	Rabl2	Rab-like protein 2A	NA	NA	NA	NA	NA	NA	NA	3	NA	NA	NA	NA
E9Q0P6	Brcc3	Lys-63-specific deubiquitinase BRCC36 (Fragment)	NA	NA	NA	NA	NA	NA	NA	NA	NA	NA	NA	1
E9Q0R4	Slfn8	Schlafen family member 8	NA	NA	NA	NA	NA	NA	NA	NA	NA	1	NA	NA
E9Q0T0	Ppt2	Lysosomal thioesterase PPT2 (Fragment)	NA	NA	NA	NA	NA	NA	NA	NA	NA	1	NA	NA
E9Q0U1	Psmd13	26S proteasome non-ATPase regulatory subunit 13	NA	NA	NA	NA	NA	NA	2	NA	NA	1	NA	NA
E9Q0U7	Hsph1	Heat shock protein 105 kDa	NA	NA	NA	NA	NA	NA	NA	3	NA	NA	NA	NA
E9Q133	Cct3	T-complex protein 1 subunit gamma	NA	NA	NA	NA	NA	NA	NA	NA	NA	33	NA	NA
E9Q1D6	Ltbp2	Latent-transforming growth factor beta-binding protein 2	NA	NA	NA	NA	NA	NA	NA	NA	NA	NA	1	NA
E9Q1F2	Actb	Actin, cytoplasmic 1	NA	NA	NA	NA	11	NA	NA	NA	NA	NA	NA	NA
E9Q1K3	Add1	Alpha-adducin	NA	NA	NA	NA	NA	NA	1	NA	NA	NA	NA	NA
E9Q1S3	Sec23a	Protein transport protein SEC23	NA	NA	NA	NA	NA	NA	1	NA	NA	NA	NA	NA
E9Q1T9	Cse1l	Chromosome segregation 1-like protein	NA	NA	NA	NA	NA	NA	NA	30	43	NA	NA	NA
E9Q1U8	Trim24	Transcription intermediary factor 1-alpha	NA	NA	NA	NA	NA	NA	1	NA	NA	NA	NA	NA
E9Q1V0	St13	Hsc70-interacting protein (Fragment)	NA	NA	NA	NA	NA	NA	1	NA	NA	NA	NA	NA
E9Q223	Hbb-bs	Hemoglobin, beta adult s chain (Fragment)	14	1	2	NA	NA	NA	NA	NA	NA	NA	NA	NA
E9Q226	Ccnyl1	Cyclin Y-like 1	NA	NA	NA	NA	NA	NA	1	1	NA	NA	NA	NA
E9Q242	Adsl	Adenylosuccinate lyase	NA	NA	NA	NA	NA	NA	19	7	7	NA	NA	NA
E9Q264	Myh15	Myosin, heavy chain 15	NA	NA	NA	NA	NA	NA	NA	NA	4	NA	NA	NA
E9Q390	Myof	Myoferlin	NA	NA	NA	NA	NA	NA	2	4	1	NA	2	6
E9Q3D6	Hsp90ab1	Heat shock protein HSP 90-beta (Fragment)	NA	1	NA	NA	2	NA	NA	NA	NA	NA	NA	NA
E9Q3H7	Dnah6	Dynein, axonemal, heavy chain 6	NA	NA	NA	NA	NA	NA	NA	NA	NA	1	NA	NA
E9Q3V6	Septin2	Septin-2	NA	NA	NA	NA	NA	NA	3	NA	NA	NA	NA	NA
E9Q3W4	Plec	Plectin	NA	NA	NA	NA	NA	NA	11	30	23	1	NA	NA
E9Q4K9	Smurf1	E3 ubiquitin-protein ligase	NA	NA	NA	NA	NA	NA	NA	1	NA	NA	NA	NA
E9Q4T8	Cul3	Cullin-3	NA	NA	NA	NA	NA	NA	NA	2	NA	NA	NA	NA
E9Q509	Pklr	Pyruvate kinase	1	1	3	NA	NA	NA	41	30	16	19	14	5
E9Q5A7	Zfhx4	Zinc finger homeobox protein 4	NA	NA	NA	NA	NA	NA	NA	NA	1	NA	NA	NA
E9Q5B5	Hk2	Hexokinase	NA	NA	NA	NA	NA	NA	NA	1	NA	NA	NA	NA
E9Q5B6	Hnrnpd	Heterogeneous nuclear ribonucleoprotein D0 (Fragment)	NA	NA	NA	NA	NA	NA	5	4	2	NA	NA	2
E9Q5F4	Actb	Actin, cytoplasmic 1 (Fragment)	NA	NA	NA	5	NA	NA	NA	NA	NA	NA	NA	NA
E9Q5F6	Ubc	Polyubiquitin-C (Fragment)	8	2	1	30	9	1	47	40	19	NA	44	44
E9Q5G1	Myo10	Unconventional myosin-X	NA	NA	NA	NA	NA	NA	NA	NA	1	NA	NA	NA
E9Q6E9	Simc1	SUMO-interacting motifs-containing 1	NA	NA	NA	NA	NA	NA	NA	NA	NA	1	NA	NA
E9Q6F4	Npepps	Puromycin-sensitive aminopeptidase	NA	NA	NA	NA	NA	NA	NA	1	4	NA	NA	NA
E9Q6F9	Zfp446	Zinc finger protein 446	NA	NA	NA	NA	NA	NA	NA	1	NA	NA	NA	NA
E9Q6R4	Arid1b	AT-rich interactive domain-containing protein 1B	NA	NA	NA	NA	NA	NA	NA	NA	NA	NA	1	NA
E9Q6V3	Blmh	Bleomycin hydrolase	NA	NA	NA	NA	NA	NA	NA	3	4	NA	NA	NA
E9Q706	Adcy9	Adenylate cyclase type 9	NA	NA	NA	NA	NA	NA	1	NA	NA	NA	NA	NA
E9Q718	Plod2	Procollagen-lysine 5-dioxygenase	NA	NA	NA	NA	NA	NA	NA	1	3	NA	NA	NA
E9Q7N9	Dnah11	Dynein, axonemal, heavy chain 11	NA	NA	NA	NA	NA	NA	1	1	NA	NA	NA	NA
E9Q7S0	Synj1	Phosphoinositide 5-phosphatase	NA	NA	NA	NA	NA	NA	NA	1	NA	NA	NA	NA
E9Q824	Pik3c3	Phosphatidylinositol 3-kinase catalytic subunit type 3	NA	NA	NA	NA	NA	NA	NA	NA	NA	1	NA	NA
E9Q880	Nup205	Nucleoporin 205	NA	NA	NA	NA	NA	NA	NA	NA	1	NA	NA	NA
E9Q8K5	Ttn	Titin	NA	NA	NA	NA	NA	NA	NA	5	NA	NA	NA	NA
E9Q981	Zfp976	Zinc finger protein 976	NA	NA	NA	NA	NA	NA	NA	1	NA	NA	NA	NA
E9Q9B8	Clu	Clusterin (Fragment)	NA	NA	NA	NA	NA	NA	NA	NA	NA	NA	4	NA
E9QAK5	Kif5b	Kinesin-like protein (Fragment)	NA	NA	NA	NA	NA	NA	NA	2	NA	NA	NA	NA
E9QAS6	Cryba4	Beta-A4 crystallin	NA	NA	1	NA	NA	NA	4	2	1	NA	NA	NA
E9QAT6	Cad	CAD protein	NA	NA	NA	NA	NA	NA	1	1	NA	NA	NA	1
E9QB02	Mars1	Methionine--tRNA ligase, cytoplasmic	NA	NA	NA	NA	NA	NA	3	9	3	2	1	2
E9QK83	Utp20	Small subunit processome component 20 homolog	NA	NA	NA	NA	NA	NA	NA	NA	NA	1	NA	NA
E9QKL0	Rad54l2	Helicase ARIP4	NA	NA	NA	NA	NA	NA	NA	NA	1	NA	NA	NA
E9QL26	Capn12	Calpain-12	NA	NA	NA	NA	NA	NA	NA	NA	NA	1	NA	NA
E9QLN4	Trim39	E3 ubiquitin-protein ligase TRIM39	NA	NA	NA	NA	NA	NA	NA	NA	1	NA	NA	NA
E9QP46	Syne2	Nesprin-2	NA	NA	NA	NA	NA	NA	NA	2	3	NA	NA	NA
E9QPD3	Zfp664	Zinc finger protein 664	NA	NA	NA	NA	NA	NA	NA	NA	1	NA	NA	NA
E9QPX1	Col18a1	Collagen alpha-1(XVIII) chain	NA	NA	NA	NA	NA	NA	NA	NA	NA	2	1	5
F1DGF6	Prkcd	Protein kinase C delta variant IX	NA	NA	NA	NA	NA	NA	NA	NA	1	NA	NA	NA
F2Z3X3	Cuedc1	CUE domain-containing protein 1	NA	NA	NA	NA	NA	NA	NA	1	4	NA	NA	NA
F2Z471	Vdac1	Voltage-dependent anion-selective channel protein 1	NA	NA	NA	NA	NA	NA	1	NA	NA	NA	NA	NA
F2Z483	Tcp1	T-complex protein 1 subunit alpha	NA	NA	NA	NA	NA	NA	25	23	8	8	6	11
F2Z4B7	Raph1	Ras association (RalGDS/AF-6) and pleckstrin homology domains 1	NA	NA	NA	NA	NA	NA	NA	1	NA	NA	NA	NA
F5H8M8	Mroh2a	Maestro heat-like repeat-containing protein family member 2A	NA	NA	NA	NA	NA	NA	NA	NA	NA	1	NA	NA
F6Q2E3	Psmc3	26S proteasome regulatory subunit 6A (Fragment)	NA	NA	NA	NA	NA	NA	NA	NA	NA	NA	2	NA
F6Q3S1	Frrs1l	DOMON domain-containing protein FRRS1L (Fragment)	NA	NA	NA	NA	NA	NA	NA	NA	1	NA	NA	NA
F6Q720	Tchp	Trichoplein keratin filament-binding protein (Fragment)	NA	NA	NA	NA	NA	NA	NA	NA	1	NA	NA	NA
F6Q750	Macf1	Microtubule-actin cross-linking factor 1 (Fragment)	NA	NA	NA	NA	NA	NA	NA	2	NA	NA	NA	NA
F6QKK2	Arl8a	ADP-ribosylation factor-like protein 8A (Fragment)	NA	NA	NA	NA	NA	NA	NA	NA	1	NA	NA	NA
F6QQQ6	Prmt5	Protein arginine N-methyltransferase 5 (Fragment)	NA	NA	NA	NA	NA	NA	NA	NA	NA	NA	1	NA
F6QTS1	Cops4	COP9 signalosome complex subunit 4 (Fragment)	NA	NA	NA	NA	NA	NA	5	NA	2	NA	NA	NA
F6QYF8	Npepps	Aminopeptidase (Fragment)	NA	NA	NA	NA	NA	NA	7	NA	NA	NA	NA	NA
F6R587	Cpne1	Copine-1 (Fragment)	NA	NA	NA	NA	NA	NA	1	NA	NA	NA	NA	NA
F6RPJ9	Ide	Insulin-degrading enzyme (Fragment)	NA	NA	NA	NA	NA	NA	NA	2	1	NA	NA	NA
F6RST1	Efcab6	EF-hand calcium-binding domain-containing protein 6 (Fragment)	NA	NA	NA	NA	NA	NA	NA	NA	1	NA	NA	NA
F6RTJ7	Cdca2	Cell division cycle-associated protein 2 (Fragment)	NA	NA	NA	NA	NA	NA	NA	NA	1	NA	NA	NA
F6RUN7	Trpm5	Transient receptor potential cation channel subfamily M member 5 (Fragment)	NA	NA	NA	NA	NA	NA	NA	2	NA	NA	NA	NA
F6RXI4	Cspg4b	Chondroitin sulfate proteoglycan 4B	1	NA	NA	NA	NA	NA	NA	NA	NA	NA	NA	NA
F6S062	Chka	Choline kinase alpha (Fragment)	NA	NA	NA	NA	NA	NA	1	2	NA	NA	NA	NA
F6SFF5	Coq9	Ubiquinone biosynthesis protein (Fragment)	NA	NA	NA	1	NA	NA	NA	NA	NA	NA	NA	NA
F6SGT4	Exosc8	Ribosomal RNA-processing protein 43 (Fragment)	NA	NA	NA	NA	NA	NA	NA	1	NA	NA	NA	NA
F6SLJ2	Git2	ARF GTPase-activating protein GIT2 (Fragment)	NA	NA	NA	NA	NA	NA	1	NA	NA	NA	NA	NA
F6SQM4	Fam234a	Protein FAM234A	NA	NA	NA	NA	NA	NA	NA	2	NA	NA	NA	NA
F6SSP6	Ubr4	E3 ubiquitin-protein ligase UBR4 (Fragment)	NA	NA	NA	NA	NA	NA	1	1	NA	2	NA	1
F6ST92	Ccdc170	Coiled-coil domain-containing 170	NA	NA	NA	NA	NA	NA	1	NA	NA	NA	NA	NA
F6T4M4	Srrm1	Serine/arginine repetitive matrix protein 1 (Fragment)	NA	NA	NA	NA	NA	1	3	3	1	NA	NA	2
F6TRD7	Csmd3	CUB and sushi domain-containing protein 3 (Fragment)	NA	NA	NA	NA	NA	NA	NA	NA	1	NA	NA	NA
F6U1Y8	Parp9	Protein mono-ADP-ribosyltransferase PARP9 (Fragment)	NA	NA	NA	NA	NA	NA	NA	1	NA	NA	NA	NA
F6U529	Gls	Glutaminase (Fragment)	NA	NA	NA	NA	NA	NA	NA	NA	NA	2	NA	NA
F6UFP6	Gapvd1	GTPase-activating protein and VPS9 domain-containing protein 1 (Fragment)	NA	NA	NA	NA	NA	NA	1	NA	NA	NA	NA	NA
F6USC6	Tbx19	T-box transcription factor TBX19 (Fragment)	NA	NA	NA	NA	NA	NA	NA	NA	NA	1	NA	NA
F6VQH5	Hnrnpdl	Heterogeneous nuclear ribonucleoprotein D-like (Fragment)	NA	NA	NA	NA	NA	NA	NA	1	NA	NA	NA	NA
F6VRE5	Piwil4	Piwi-like protein 4 (Fragment)	NA	NA	NA	NA	NA	NA	1	NA	NA	NA	NA	NA
F6VTL9	Nbeal2	Neurobeachin-like protein 2 (Fragment)	NA	NA	NA	NA	NA	NA	NA	NA	1	NA	NA	NA
F6VTS9	Nsmf	NMDA receptor synaptonuclear-signaling and neuronal migration factor (Fragment)	NA	NA	NA	NA	NA	NA	1	NA	NA	NA	NA	NA
F6VUT6	Gm8251	Predicted gene 8251	NA	NA	NA	NA	NA	NA	1	1	NA	NA	NA	NA
F6W6N3	Ablim2	Actin-binding LIM protein 2 (Fragment)	NA	NA	NA	NA	NA	NA	NA	NA	1	NA	NA	NA
F6WN43	Hscb	Iron-sulfur cluster co-chaperone protein HscB (Fragment)	NA	NA	NA	NA	NA	NA	NA	1	NA	NA	NA	NA
F6WNZ2	Acsl1	Long-chain-fatty-acid--CoA ligase 1 (Fragment)	NA	NA	NA	NA	NA	NA	NA	NA	1	1	2	NA
F6WRF1	Acp4	Testicular acid phosphatase (Fragment)	NA	NA	NA	NA	NA	NA	NA	1	NA	NA	NA	NA
F6WZA2	Cfb	Complement factor B (Fragment)	NA	NA	NA	NA	NA	NA	NA	1	NA	NA	NA	NA
F6XJA1	Myef2	Myelin expression factor 2 (Fragment)	NA	NA	NA	NA	NA	NA	NA	1	NA	NA	NA	NA
F6XP90	Huwe1	E3 ubiquitin-protein ligase HUWE1 (Fragment)	NA	NA	NA	NA	NA	NA	2	NA	NA	NA	NA	NA
F6XPR4	Bcor	BCL-6 corepressor (Fragment)	NA	NA	NA	NA	NA	NA	1	NA	NA	NA	NA	NA
F6XT74	Fam161a	Protein FAM161A (Fragment)	NA	NA	NA	NA	NA	NA	1	NA	1	NA	NA	NA
F6XVM5	Atp5o	ATP synthase subunit O, mitochondrial (Fragment)	NA	NA	NA	NA	NA	NA	1	NA	NA	NA	NA	NA
F6XX22	Med24	Mediator complex subunit 24	NA	NA	NA	NA	NA	NA	NA	1	NA	1	NA	NA
F6XZM9	Mprip	Myosin phosphatase Rho-interacting protein (Fragment)	NA	NA	NA	NA	NA	NA	NA	NA	1	NA	NA	NA
F6YCH1	Wapl	Wings apart-like protein homolog (Fragment)	NA	NA	NA	NA	NA	NA	NA	NA	1	NA	NA	NA
F6YTL8	Ylpm1	YLP motif-containing protein 1 (Fragment)	NA	NA	NA	NA	NA	NA	NA	1	NA	NA	NA	NA
F6YZU5	Dlg5	Disks large homolog 5 (Fragment)	NA	NA	NA	NA	NA	NA	NA	NA	1	NA	NA	NA
F6ZE40	Coq6	Ubiquinone biosynthesis monooxygenase COQ6, mitochondrial (Fragment)	NA	NA	NA	NA	NA	NA	1	NA	NA	NA	NA	NA
F6ZEW4	Cse1l	Exportin-2 (Fragment)	NA	NA	NA	NA	NA	NA	18	NA	NA	NA	NA	2
F6ZS17	Ttc3	E3 ubiquitin-protein ligase TTC3 (Fragment)	NA	NA	NA	NA	NA	NA	NA	NA	NA	NA	1	NA
F6ZSB7	Phgdh	D-3-phosphoglycerate dehydrogenase (Fragment)	NA	NA	NA	NA	NA	NA	23	26	40	3	1	3
F7A5C5	Ablim2	Actin-binding LIM protein 2 (Fragment)	NA	NA	NA	NA	NA	NA	NA	1	1	NA	NA	NA
F7A5Y7	6720489N17Rik	RIKEN cDNA 6720489N17 gene	NA	NA	NA	NA	NA	NA	NA	1	NA	NA	NA	NA
F7ABZ6	Dnah10	Dynein, axonemal, heavy chain 10	NA	NA	NA	NA	NA	NA	1	1	NA	NA	NA	1
F7ADT6	Gapvd1	GTPase-activating protein and VPS9 domain-containing protein 1 (Fragment)	NA	NA	NA	NA	NA	NA	NA	NA	1	NA	NA	NA
F7ARC5	Grin3b	Glutamate receptor ionotropic, NMDA 3B (Fragment)	NA	NA	NA	NA	NA	NA	NA	NA	NA	1	NA	NA
F7AUV3	Cep164	Centrosomal protein of 164 kDa (Fragment)	NA	1	NA	NA	NA	NA	2	4	4	1	4	2
F7AWK3	Sbf1	Myotubularin-related protein 5 (Fragment)	NA	NA	NA	NA	NA	NA	NA	1	NA	NA	NA	NA
F7B5D6	Npw	Neuropeptide W	NA	NA	NA	NA	NA	NA	1	NA	1	NA	NA	NA
F7BA91	Psmd5	26S proteasome non-ATPase regulatory subunit 5 (Fragment)	NA	NA	NA	NA	NA	NA	1	NA	NA	NA	NA	NA
F7BHW1	Celsr2	Cadherin EGF LAG seven-pass G-type receptor 2 (Fragment)	NA	NA	NA	NA	NA	NA	NA	NA	2	NA	NA	NA
F7BTZ2	Pml	Protein PML (Fragment)	NA	NA	NA	NA	NA	NA	3	8	1	NA	NA	NA
F7BWJ0	Vangl1	Vang-like protein 1 (Fragment)	NA	NA	NA	NA	NA	NA	1	NA	NA	NA	NA	NA
F7C528	Chd3	DNA helicase (Fragment)	NA	NA	NA	NA	NA	NA	NA	1	NA	NA	NA	NA
F7CD45	Gm8334	Predicted gene 8334	NA	NA	NA	NA	NA	NA	NA	NA	NA	NA	1	NA
F7CFA5	Glud1	Glutamate dehydrogenase 1, mitochondrial (Fragment)	NA	NA	NA	NA	NA	NA	1	NA	NA	NA	NA	NA
F7CFT8	Myrip	Rab effector MyRIP (Fragment)	NA	NA	NA	NA	NA	NA	1	NA	NA	NA	NA	NA
F7CHQ7	Nop56	Nucleolar protein 56 (Fragment)	NA	NA	NA	NA	NA	NA	NA	NA	NA	NA	NA	1
F7CIP8	Pcyox1	Prenylcysteine oxidase (Fragment)	NA	NA	NA	NA	NA	NA	NA	NA	NA	NA	NA	1
F7CJS8	Rps9	40S ribosomal protein S9 (Fragment)	NA	NA	NA	1	NA	NA	3	4	3	40	25	26
F7CUK9	Crygd	Gamma-crystallin D (Fragment)	NA	NA	7	NA	NA	NA	NA	NA	NA	NA	NA	NA
F7CVM6	Dock3	Dedicator of cytokinesis protein 3 (Fragment)	NA	NA	1	NA	NA	NA	NA	NA	NA	NA	NA	NA
F7D1R5	Plaa	Phospholipase A-2-activating protein (Fragment)	NA	NA	NA	NA	NA	NA	NA	NA	2	NA	NA	NA
F7D418	Nbeal1	Neurobeachin-like 1 (Fragment)	NA	1	NA	NA	NA	NA	1	NA	NA	17	NA	NA
F8VPJ6	Rfx7	Regulatory factor X, 7	NA	NA	NA	NA	NA	NA	NA	NA	1	1	NA	NA
F8VPP8	Zc3h7b	Zinc finger CCCH type-containing 7B	NA	NA	NA	NA	NA	NA	1	NA	NA	NA	NA	NA
F8VPX1	Usp7	Ubiquitin carboxyl-terminal hydrolase 7	NA	NA	NA	NA	NA	NA	1	1	NA	NA	NA	NA
F8VQJ3	Lamc1	Laminin subunit gamma-1	NA	NA	NA	NA	NA	NA	NA	7	5	5	3	17
F8WGG3	Myg1	MYG1 exonuclease (Fragment)	NA	NA	NA	NA	NA	NA	NA	1	NA	NA	NA	NA
F8WGN6	Kif21a	Kinesin-like protein KIF21A	NA	NA	NA	NA	NA	NA	NA	NA	NA	2	NA	NA
F8WGX5	Dmxl1	DmX-like protein 1	NA	NA	NA	NA	NA	NA	NA	NA	NA	1	NA	NA
F8WH41	Strn	Striatin	NA	NA	NA	NA	NA	NA	1	NA	NA	1	NA	NA
F8WHK6	Phykpl	5-phosphohydroxy-L-lysine phospho-lyase	NA	NA	NA	1	2	NA	NA	NA	1	2	1	NA
F8WHS8	Pias2	E3 SUMO-protein ligase PIAS2	NA	NA	NA	NA	NA	NA	NA	NA	1	NA	NA	NA
F8WHU5	Pds5b	Sister chromatid cohesion protein PDS5 homolog B	NA	NA	NA	NA	NA	NA	1	1	2	NA	NA	NA
F8WIR1	Ctsd	Cathepsin D	NA	NA	NA	NA	NA	NA	3	3	NA	1	NA	1
F8WJ41	Rps15a	40S ribosomal protein S15a (Fragment)	NA	NA	NA	NA	NA	NA	NA	13	NA	NA	5	8
F8WJ74	Gramd1a	Protein Aster-A	NA	NA	NA	NA	NA	NA	NA	NA	2	NA	NA	NA
G0XYH7	Cerkl	Ceramide kinase-like isoform 29	NA	NA	NA	NA	NA	NA	NA	NA	1	NA	NA	NA
G3UWC5	Tgif1	Homeobox protein TGIF1	NA	NA	NA	NA	NA	NA	NA	NA	NA	1	NA	NA
G3UWI5	Kmt2c	Histone-lysine N-methyltransferase 2C (Fragment)	NA	NA	NA	NA	NA	NA	2	1	NA	NA	5	3
G3UWL7	H2az1	Histone H2A	NA	NA	NA	NA	NA	NA	1	5	1	NA	1	2
G3UX67	Psmd11	26S proteasome non-ATPase regulatory subunit 11 (Fragment)	NA	NA	NA	NA	NA	NA	NA	8	7	NA	1	1
G3UXL2	Prps1l3	Ribose-phosphate diphosphokinase	NA	NA	NA	NA	NA	NA	NA	2	NA	NA	NA	NA
G3UXP4	Plcg1	Phosphoinositide phospholipase C	NA	NA	NA	NA	NA	NA	1	NA	NA	NA	NA	NA
G3UXT9	Usp13	Ubiquitinyl hydrolase 1	NA	NA	NA	NA	NA	NA	NA	NA	NA	NA	NA	2
G3UXV3	Sdr42e1	Short-chain dehydrogenase/reductase family 42E member 1 (Fragment)	NA	NA	NA	NA	NA	NA	NA	1	NA	NA	NA	NA
G3UY38	Hnrnpl	Heterogeneous nuclear ribonucleoprotein L	NA	NA	NA	NA	NA	NA	NA	1	NA	NA	NA	1
G3UY52	Usp9x	Probable ubiquitin carboxyl-terminal hydrolase FAF-X (Fragment)	NA	NA	NA	NA	NA	NA	NA	NA	NA	NA	1	NA
G3UY86	Pfas	Phosphoribosylformylglycinamidine synthase (Fragment)	NA	NA	NA	NA	NA	NA	NA	2	2	NA	NA	NA
G3UYF0	Banp	Protein BANP (Fragment)	NA	NA	NA	NA	NA	NA	3	NA	NA	NA	NA	NA
G3UYQ6	Klhdc1	Kelch domain-containing protein 1	NA	NA	NA	NA	NA	NA	NA	NA	NA	1	NA	NA
G3UYU4	Flot1	Flotillin	NA	NA	NA	NA	NA	NA	NA	NA	1	NA	NA	NA
G3UYZ0	Bag6	Large proline-rich protein BAG6 (Fragment)	NA	NA	NA	NA	NA	NA	NA	3	NA	NA	NA	1
G3UZ34	Eftud2	116 kDa U5 small nuclear ribonucleoprotein component	NA	NA	NA	NA	NA	NA	5	27	23	1	NA	NA
G3UZD6	Ube4b	Ubiquitin conjugation factor E4 B	NA	NA	NA	NA	NA	NA	NA	1	NA	NA	NA	1
G3UZE6	Obox5	Oocyte-specific homeobox 5 (Fragment)	NA	NA	NA	NA	NA	NA	1	NA	NA	NA	NA	NA
G3UZR0	Ddah2	Dimethylargininase (Fragment)	NA	NA	NA	NA	NA	NA	NA	NA	NA	1	NA	NA
G3UZT4	Hap1	Huntingtin-associated protein 1 (Fragment)	NA	NA	NA	NA	NA	NA	NA	NA	2	NA	NA	NA
G3UZU9	Hoxa7	Homeobox protein Hox-A7	NA	NA	NA	NA	NA	NA	NA	NA	1	NA	NA	NA
G3UZW8	Psmb8	Proteasome subunit beta (Fragment)	NA	NA	NA	NA	NA	NA	NA	NA	14	1	1	5
G3V013	Bag6	Large proline-rich protein BAG6 (Fragment)	NA	NA	NA	NA	NA	NA	3	NA	NA	NA	NA	NA
G3X920	Armc8	Armadillo repeat-containing protein 8	NA	NA	NA	NA	NA	NA	NA	NA	NA	NA	NA	1
G3X934	Wdr70	WD repeat-containing protein 70	NA	NA	NA	NA	NA	NA	1	NA	NA	NA	NA	NA
G3X9C3	Gpr22	G-protein-coupled receptor 22	NA	NA	NA	NA	NA	NA	1	NA	NA	NA	NA	NA
G3X9H7	Mtss1	Protein MTSS 1	NA	NA	NA	NA	NA	NA	NA	NA	1	NA	NA	NA
G3X9I6	Trim68	E3 ubiquitin-protein ligase TRIM68	NA	NA	NA	NA	NA	NA	1	NA	NA	NA	NA	NA
G3X9J6	Nt5c2	Cytosolic purine 5'-nucleotidase	NA	NA	NA	NA	NA	NA	NA	NA	2	NA	NA	NA
G3X9Q1	Itga7	Integrin alpha-7	NA	NA	NA	NA	NA	NA	NA	NA	NA	NA	NA	1
G3X9T8	Cp	Ceruloplasmin	NA	NA	NA	NA	NA	NA	7	22	16	NA	NA	NA
G5E832	Apc2	Adenomatous polyposis coli protein 2	NA	NA	NA	NA	NA	NA	NA	NA	NA	1	NA	NA
G5E879	Rad52	DNA repair protein RAD52 homolog	NA	NA	NA	NA	NA	NA	1	NA	NA	1	NA	NA
G5E8A7	Samd4b	Protein Smaug homolog 2	NA	NA	NA	NA	NA	NA	NA	NA	NA	1	NA	NA
G5E8W1	Triobp	TRIO and F-actin-binding protein (Fragment)	NA	NA	NA	NA	NA	NA	NA	1	NA	NA	NA	NA
G8JL51	Polr1e	DNA-directed RNA polymerase I subunit RPA49 (Fragment)	NA	NA	NA	NA	NA	NA	NA	NA	NA	NA	NA	1
H3BIV8	Gpm6b	Neuronal membrane glycoprotein M6-b	NA	NA	NA	NA	NA	NA	1	NA	NA	NA	NA	NA
H3BJD9	Traf7	E3 ubiquitin-protein ligase TRAF7 (Fragment)	NA	NA	NA	NA	NA	NA	NA	2	1	NA	NA	NA
H3BJE0	Grn	Progranulin (Fragment)	NA	NA	NA	NA	NA	NA	NA	1	NA	NA	NA	NA
H3BJL2	9930021J03Rik	RIKEN cDNA 9930021J03 gene (Fragment)	NA	NA	NA	NA	NA	NA	NA	4	NA	NA	NA	NA
H3BJT9	Mrpl17	39S ribosomal protein L17, mitochondrial (Fragment)	NA	NA	NA	NA	NA	NA	NA	1	NA	NA	NA	NA
H3BK33	Med23	Mediator complex subunit 23 (Fragment)	NA	NA	NA	NA	NA	NA	2	NA	NA	NA	NA	NA
H3BK39	Rapgef3	Rap guanine nucleotide exchange factor 3	NA	NA	NA	NA	NA	NA	1	NA	NA	NA	NA	NA
H3BK84	Prkar2b	cAMP-dependent protein kinase type II-beta regulatory subunit	NA	NA	NA	NA	NA	NA	1	NA	NA	NA	NA	NA
H3BKE1	Plch1	Phosphoinositide phospholipase C (Fragment)	NA	NA	NA	NA	NA	NA	1	NA	NA	NA	NA	NA
H3BKM0	Ap2b1	AP complex subunit beta	NA	NA	NA	NA	NA	NA	NA	2	NA	NA	NA	NA
H3BKR2	Gnb1	Guanine nucleotide-binding protein G(I)/G(S)/G(T) subunit beta-1 (Fragment)	1	NA	NA	NA	NA	NA	NA	NA	NA	NA	NA	NA
H3BKW9	C3	Complement C3 (Fragment)	NA	NA	NA	NA	NA	NA	31	29	5	NA	NA	NA
H3BKY6	Bnc2	Zinc finger protein basonuclin-2 (Fragment)	NA	NA	NA	NA	NA	NA	1	NA	1	NA	NA	NA
H3BL60	C3	Complement C3 (Fragment)	NA	NA	NA	NA	NA	NA	19	35	33	NA	NA	NA
H3BL99	Esd	Esterase D (Fragment)	NA	NA	NA	NA	NA	NA	2	NA	NA	1	NA	NA
H3BLG5	Sdcbp	Syntenin-1 (Fragment)	NA	NA	NA	NA	NA	NA	NA	NA	1	1	1	2
H3BLP7	Hnrnpk	Heterogeneous nuclear ribonucleoprotein K (Fragment)	NA	NA	NA	NA	NA	NA	NA	1	NA	NA	NA	NA
H7BXC3	Tpi1	Triosephosphate isomerase	NA	1	1	NA	NA	NA	NA	NA	NA	NA	NA	NA
I6L970	Aup1	Aup1 protein	NA	NA	NA	NA	NA	NA	NA	1	NA	NA	NA	NA
I6L9G8	Dtx3l	RING-type E3 ubiquitin transferase	NA	NA	NA	NA	NA	NA	NA	3	2	4	6	1
I6L9H1	Dvl2	Dishevelled 2, dsh homolog (Drosophila)	NA	NA	NA	NA	NA	NA	NA	NA	1	NA	NA	NA
I7ENE7	Uchl1	Ubiquitin carboxyl-terminal hydrolase (Fragment)	NA	NA	NA	NA	NA	NA	NA	1	NA	NA	NA	NA
I7HLV2	Rpl10	60S ribosomal protein L10 (Fragment)	NA	NA	NA	1	NA	NA	NA	NA	1	7	4	10
J3QMC2	Pfn1	Profilin-1	NA	NA	NA	NA	NA	NA	NA	2	NA	NA	NA	NA
J3QMC5	Mdn1	Midasin	NA	NA	NA	NA	NA	NA	NA	1	NA	NA	NA	NA
J3QMC7	S100a2	S100 calcium-binding protein A2	NA	NA	NA	NA	NA	NA	NA	NA	NA	6	1	NA
J3QN38	Gm21972	Predicted gene 21972 (Fragment)	NA	NA	NA	NA	NA	NA	2	8	16	2	NA	NA
J3QNA8	Rnpepl1	Aminopeptidase RNPEPL1 (Fragment)	NA	NA	NA	NA	NA	NA	1	NA	NA	NA	NA	NA
J3QNB3	Adam17	Disintegrin and metalloproteinase domain-containing protein 17	NA	NA	NA	NA	NA	NA	2	NA	NA	NA	NA	NA
J3QNW0	Dnmt1	DNA (cytosine-5)-methyltransferase	NA	NA	NA	NA	NA	NA	1	4	2	NA	NA	NA
J3QP45	Hnrnpf	Heterogeneous nuclear ribonucleoprotein F (Fragment)	NA	NA	NA	NA	NA	NA	NA	1	1	NA	NA	NA
J3QPR3	Smad6	Mothers against decapentaplegic homolog 6	NA	NA	NA	NA	1	NA	NA	NA	NA	NA	NA	NA
J3QPZ9	Eno3	2-phospho-D-glycerate hydro-lyase (Fragment)	5	NA	NA	NA	NA	NA	NA	NA	NA	NA	NA	NA
J7P1W8	Ifggb3	Interferon-gamma-inducible GTPase Ifggb3 protein	NA	NA	NA	NA	NA	NA	NA	NA	1	NA	NA	NA
J7PDL1	Ifggd1	Interferon-gamma-inducible GTPase Ifggd1 protein	NA	NA	NA	NA	NA	NA	NA	NA	1	NA	NA	NA
J9JI28	Vwa3b	von Willebrand factor A domain-containing 3B	NA	NA	NA	NA	NA	NA	NA	NA	NA	NA	NA	1
K3W4M2	Ryr1	Ryanodine receptor 1	NA	NA	NA	NA	NA	NA	NA	1	NA	NA	NA	NA
K7N6M5	Gm3476	Predicted gene 3476	NA	NA	NA	NA	NA	NA	NA	NA	1	NA	NA	NA
K7N705	Vmn2r33	Vomeronasal 2, receptor 33	NA	NA	NA	NA	NA	NA	NA	2	NA	NA	NA	NA
K7T9I0	IgM heavy chain variable region	IgM heavy chain variable region (Fragment)	NA	NA	NA	NA	NA	NA	NA	NA	1	NA	NA	NA
K7TH85	IgA heavy chain variable region	IgA heavy chain variable region (Fragment)	NA	NA	NA	NA	NA	NA	1	NA	NA	NA	NA	NA
K7U6D0	IgA heavy chain variable region (Fragment)	IgA heavy chain variable region (Fragment)	NA	NA	NA	NA	NA	NA	NA	NA	NA	1	NA	NA
M0QWD8	Gm10267	Predicted gene 10267	NA	NA	NA	NA	NA	NA	1	NA	NA	NA	NA	NA
M0QWN7	Usp35	Ubiquitin-specific peptidase 35	NA	NA	NA	NA	NA	NA	NA	1	NA	NA	NA	NA
M0QWP1	Agrn	Agrin	NA	NA	NA	NA	NA	NA	48	NA	NA	NA	NA	NA
M1VB37	Mta1	Metastasis-associated protein MTA1 isoform 7	NA	NA	NA	NA	NA	NA	4	5	2	NA	NA	NA
M9MMK0	Sema3b	Semaphorin-3B	1	NA	NA	NA	NA	NA	NA	1	NA	NA	NA	NA
O08673	htlf	Htlf winged helix transcription factor (Fragment)	NA	NA	NA	NA	NA	NA	NA	1	NA	NA	NA	NA
O08821	Dync1h1	Cytoplasmic dynein heavy chain (Fragment)	NA	NA	NA	NA	NA	NA	NA	NA	NA	NA	NA	1
O08846	Htf9-a/RanBP1	Htf9-a/RanBP1 protein (Fragment)	NA	NA	NA	NA	NA	NA	NA	2	NA	NA	NA	NA
O35558	Erk2	Mitogen-activated protein kinase	NA	NA	NA	NA	NA	NA	NA	NA	1	NA	NA	NA
O70238	Rhox6	Homeobox protein PSX	NA	NA	NA	NA	NA	NA	NA	1	NA	NA	NA	NA
O70402	Kinesin heavy chain (Fragment)	Kinesin heavy chain (Fragment)	NA	NA	NA	NA	NA	NA	NA	NA	1	NA	NA	NA
O70569	rps14	Ribosomal protein S14	NA	NA	NA	NA	NA	NA	11	16	18	36	73	81
O88394	Sp100	Sp100 (Fragment)	NA	NA	NA	NA	NA	NA	2	NA	NA	NA	NA	NA
O88601	Sdcbp	Syntenin	NA	NA	NA	NA	NA	NA	1	NA	NA	NA	NA	NA
O89052	Tuba1b	Alpha-tubulin (Fragment)	NA	NA	NA	1	NA	NA	NA	NA	NA	NA	NA	NA
O89072	Rps2	40S ribosomal protein S2 (Fragment)	NA	NA	NA	NA	NA	NA	NA	12	8	NA	111	77
P70410	Gnl2	Nucleolar GTP-binding protein 2 (Fragment)	NA	NA	NA	NA	NA	NA	NA	NA	NA	1	NA	NA
P97406	D17H6S56E-5	Envelope protein	NA	NA	NA	NA	NA	NA	11	12	6	NA	NA	1
Q059T5	Mgat5	Alpha-1,6-mannosyl-glycoprotein 6-beta-N-acetylglucosaminyltransferase	NA	NA	NA	NA	NA	NA	NA	NA	1	NA	NA	NA
Q05BD4	Prpsap2	Prpsap2 protein	NA	NA	NA	NA	NA	NA	NA	1	NA	NA	NA	NA
Q05BL6	Marcks	Marcks protein (Fragment)	NA	NA	1	NA	NA	NA	NA	NA	NA	NA	NA	NA
Q05CK5	Bbx	Bbx protein (Fragment)	NA	NA	NA	NA	NA	NA	2	NA	NA	NA	NA	NA
Q05DU8	Rrm1	Ribonucleoside-diphosphate reductase (Fragment)	NA	NA	NA	NA	NA	NA	11	1	12	2	1	1
Q076U5	Tex101	TEX101 transcript 1 (Fragment)	NA	NA	NA	NA	NA	NA	NA	NA	NA	1	NA	NA
Q08EK4	Krt77	Keratin 77	61	34	38	55	56	12	22	27	7	5	7	18
Q0GJK2	Arrdc2	Arrestin domain-containing 2 (Fragment)	NA	NA	NA	NA	NA	NA	NA	3	NA	NA	NA	NA
Q0P520	Nlrp4c	Nlrp4c protein	NA	NA	NA	NA	NA	NA	NA	NA	NA	NA	1	NA
Q0P6I6	Ccdc91	Coiled-coil domain containing 91	NA	NA	NA	NA	NA	NA	3	2	2	NA	NA	NA
Q0QER9	Idh1	IDP (Fragment)	NA	NA	NA	NA	NA	NA	2	NA	6	NA	NA	NA
Q0VAX2	Isl2	Insulin gene enhancer protein ISL-2	NA	NA	NA	NA	NA	NA	1	NA	NA	NA	NA	NA
Q0VBK8	Cdk6	Cyclin-dependent kinase 6	NA	NA	NA	NA	NA	NA	NA	NA	NA	NA	2	NA
Q0VBT7	P2ry4	P2Y purinoceptor 4	NA	NA	NA	NA	NA	NA	NA	NA	NA	1	NA	NA
Q0VDP2	Slc2a13	Slc2a13 protein	NA	NA	NA	NA	NA	NA	NA	NA	NA	2	2	NA
Q0VFY0	Zfp72	Zinc finger protein 72	NA	NA	NA	NA	NA	NA	1	NA	NA	NA	NA	NA
Q148P9	Reln	Reln protein	NA	NA	NA	NA	NA	NA	1	NA	NA	NA	NA	NA
Q148R7	Hrnr	Hrnr protein	NA	NA	NA	NA	NA	NA	NA	NA	NA	NA	1	NA
Q148T4	Tnc	Tnc protein	NA	NA	NA	NA	NA	NA	45	57	95	32	19	33
Q149V4	H2ac20	Histone H2A	NA	NA	1	NA	NA	NA	NA	NA	NA	NA	NA	NA
Q14AA6	1700009N14Rik	GTP-binding nuclear protein Ran	NA	NA	NA	NA	NA	NA	97	87	85	51	23	24
Q1AFZ4	Clrf	Lectin-like transmembrane protein (Fragment)	NA	NA	NA	NA	NA	NA	1	NA	NA	NA	NA	NA
Q1XGY5	Frem2	Fras1 related extracellular matrix protein 2	NA	NA	NA	NA	NA	NA	1	3	1	NA	NA	NA
Q29SA9	Nckap5	NCK-associated protein 5	NA	NA	NA	NA	NA	NA	NA	NA	1	NA	NA	NA
Q2HJ09	Dmp1	Dmp1 protein	NA	NA	NA	NA	NA	NA	NA	1	NA	NA	NA	NA
Q2TA59	Cd209a	Cd209a protein	NA	NA	NA	NA	NA	NA	NA	NA	1	NA	NA	NA
Q2V9F5	1700003O11Rik	Spermatocyte-specific marker protein	NA	NA	NA	NA	NA	NA	NA	1	NA	NA	NA	NA
Q31124	H2-Eb1	H2-IE-beta chain (Fragment)	1	NA	NA	NA	NA	NA	NA	NA	NA	NA	NA	NA
Q31152	MHC class I Q4 beta-2-microglobulin (Qb-1)	MHC class I Q4 beta-2-microglobulin (Qb-1) (Fragment)	NA	NA	NA	NA	NA	NA	6	NA	NA	NA	NA	NA
Q32MR7	Kcnh1	Potassium voltage-gated channel, subfamily H (Eag-related), member 1	NA	NA	NA	NA	NA	NA	NA	NA	NA	NA	NA	1
Q3MIA8	Gps1	COP9 signalosome complex subunit 1	NA	NA	NA	NA	NA	NA	21	11	23	NA	NA	NA
Q3SYK5	Abl1	Tyrosine-protein kinase	NA	NA	NA	NA	NA	NA	NA	NA	1	NA	NA	NA
Q3T9T4	Eif2b3	NTP_transferase domain-containing protein	NA	NA	NA	NA	NA	NA	NA	NA	NA	1	NA	NA
Q3T9U9	Rpl3	Uncharacterized protein	NA	NA	NA	NA	NA	NA	NA	NA	NA	4	NA	NA
Q3T9V9	Flnb	Uncharacterized protein (Fragment)	NA	NA	NA	NA	NA	NA	3	NA	NA	NA	NA	NA
Q3TA32	Gm1966	MACPF domain-containing protein (Fragment)	NA	NA	NA	NA	NA	NA	NA	NA	1	NA	NA	NA
Q3TA53	Limk1	Uncharacterized protein (Fragment)	NA	NA	NA	NA	NA	NA	NA	NA	2	NA	NA	NA
Q3TAE7	Mylip	RING-type E3 ubiquitin transferase	NA	NA	NA	NA	NA	NA	NA	NA	1	NA	NA	NA
Q3TAP7	Cdr2	Uncharacterized protein	NA	NA	NA	NA	NA	NA	NA	NA	NA	NA	NA	1
Q3TAS8	Dpysl3	Amidohydro-rel domain-containing protein	NA	NA	NA	NA	NA	NA	1	2	4	NA	NA	NA
Q3TAZ3	Dync1h1	DHC_N2 domain-containing protein (Fragment)	NA	NA	NA	NA	NA	NA	NA	1	3	NA	NA	3
Q3TB31	Gsk3b	Glycogen synthase kinase-3 beta (Fragment)	NA	NA	NA	NA	NA	NA	NA	2	NA	NA	NA	NA
Q3TB63	Hspa8	Uncharacterized protein (Fragment)	NA	NA	NA	3	NA	NA	NA	NA	NA	NA	6	9
Q3TBB4	Fn1	Fibronectin (Fragment)	NA	4	3	NA	NA	8	NA	NA	NA	NA	NA	NA
Q3TBM1	Man2b1	Alpha-mannosidase	NA	NA	NA	NA	NA	NA	NA	NA	1	NA	NA	NA
Q3TBQ1	Krt80	Keratin, type II cytoskeletal 80	NA	NA	NA	1	1	NA	3	1	17	2	2	3
Q3TC17	Ctsb	Cathepsin B	NA	NA	NA	NA	NA	NA	1	NA	1	NA	NA	NA
Q3TC53	Cap1	Adenylyl cyclase-associated protein	NA	NA	NA	NA	NA	NA	1	4	NA	NA	NA	NA
Q3TCC3	Cytip	PDZ domain-containing protein	NA	NA	NA	NA	NA	NA	1	NA	NA	NA	NA	NA
Q3TCF4	Atxn10	Ataxin-10	NA	NA	NA	NA	NA	NA	NA	1	NA	NA	NA	NA
Q3TCK3	Ehd1	Uncharacterized protein (Fragment)	NA	NA	NA	NA	NA	NA	NA	2	1	NA	NA	NA
Q3TCL2	Akr1b3	Aldo_ket_red domain-containing protein (Fragment)	NA	NA	NA	NA	NA	NA	1	5	NA	1	NA	NA
Q3TCS0	Prep	Post-proline cleaving enzyme	NA	NA	NA	NA	NA	NA	6	6	4	1	NA	NA
Q3TCV9	Npepl1	CYTOSOL_AP domain-containing protein	NA	NA	NA	NA	NA	NA	1	1	1	NA	NA	NA
Q3TCW5	Nrbp1	Protein kinase domain-containing protein	NA	NA	NA	NA	NA	NA	NA	3	NA	NA	NA	NA
Q3TDE2	Rfx7	Regulatory factor X, 7	NA	1	NA	NA	NA	NA	1	2	2	NA	NA	NA
Q3TDL0	Cops7b	PCI domain-containing protein	NA	NA	NA	NA	NA	NA	NA	NA	1	NA	NA	NA
Q3TDM6	Rgp1	RAB6A-GEF complex partner protein 2	NA	NA	NA	NA	NA	NA	1	NA	NA	NA	NA	NA
Q3TDP9	Emilin2	EMILIN-2	NA	NA	NA	NA	NA	NA	NA	NA	NA	NA	1	NA
Q3TDS7	Capn5	Calpain catalytic domain-containing protein	NA	NA	NA	NA	NA	NA	NA	NA	NA	1	NA	NA
Q3TDU5	Mfge8	Lactadherin	NA	NA	NA	NA	NA	NA	NA	1	2	1	NA	2
Q3TDY6	Tpp1	Tripeptidyl aminopeptidase	NA	NA	NA	NA	NA	NA	NA	NA	4	NA	NA	NA
Q3TEF0	Cdc23	TPR_REGION domain-containing protein (Fragment)	NA	NA	NA	NA	NA	NA	2	NA	1	NA	NA	NA
Q3TEG9	Bcl11b	Uncharacterized protein	NA	NA	NA	NA	NA	NA	2	NA	NA	NA	NA	NA
Q3TEK2	Hspa8	Uncharacterized protein	NA	NA	NA	NA	NA	NA	92	109	63	NA	NA	NA
Q3TF14	Ahcy	Adenosylhomocysteinase	NA	NA	NA	NA	NA	NA	44	NA	NA	NA	NA	NA
Q3TF62	Actl6a	Uncharacterized protein	NA	NA	NA	NA	NA	NA	NA	NA	1	NA	NA	NA
Q3TF87	Dars	Aspartate--tRNA ligase, cytoplasmic	NA	NA	NA	NA	NA	NA	42	36	43	5	NA	13
Q3TFC2	Nono	Uncharacterized protein	NA	NA	NA	NA	NA	NA	NA	NA	NA	NA	NA	1
Q3TFE8	Kpnb1	Importin N-terminal domain-containing protein	NA	NA	NA	NA	NA	NA	41	40	18	NA	1	1
Q3TFF0	Dnaja2	Uncharacterized protein	NA	NA	NA	NA	NA	NA	NA	1	NA	NA	NA	NA
Q3TG21	Atp6v1c1	V-type proton ATPase subunit C	NA	NA	NA	NA	NA	NA	1	NA	NA	NA	NA	NA
Q3TG71	Cndp2	Uncharacterized protein	NA	NA	NA	NA	NA	NA	1	NA	NA	NA	NA	NA
Q3TG90	Mapre2	Microtubule-associated protein RP/EB family member 2	NA	NA	NA	NA	NA	NA	NA	NA	NA	NA	1	NA
Q3TGU7	Pa2g4	Peptidase_M24 domain-containing protein	NA	NA	NA	NA	NA	NA	3	5	4	NA	NA	NA
Q3TH77	Numa1	Uncharacterized protein	NA	NA	NA	NA	NA	NA	NA	1	1	NA	NA	NA
Q3THA0	Eif3g	Eukaryotic translation initiation factor 3 subunit G	NA	NA	NA	NA	NA	NA	2	3	1	NA	NA	NA
Q3THC1	Psmd9	26S proteasome non-ATPase regulatory subunit 9	NA	1	NA	NA	NA	NA	NA	NA	NA	NA	NA	NA
Q3THL2	Psma7	Proteasome endopeptidase complex	NA	NA	NA	NA	NA	NA	1	3	3	NA	NA	1
Q3THQ5	Stip1	Uncharacterized protein	NA	NA	NA	NA	NA	NA	1	NA	NA	1	NA	2
Q3TI05	Cct6a	Chaperonin containing Tcp1, subunit 6a (Zeta)	NA	NA	NA	NA	NA	NA	18	33	26	15	8	12
Q3TI06	Ugdh	UDP-glucose 6-dehydrogenase (Fragment)	NA	NA	NA	NA	NA	NA	NA	1	NA	NA	NA	NA
Q3TI31	Anapc4	Anaphase-promoting complex subunit 4	NA	NA	NA	NA	NA	NA	NA	NA	2	NA	NA	NA
Q3TI61	Psmd2	26S proteasome non-ATPase regulatory subunit 2	NA	NA	NA	NA	NA	NA	28	41	47	11	11	25
Q3TI71	Prpf8	MPN domain-containing protein	NA	NA	NA	NA	NA	NA	NA	NA	NA	NA	NA	1
Q3TIG9	Myl6	EF-hand domain-containing protein	NA	NA	NA	NA	NA	NA	NA	3	NA	NA	NA	NA
Q3TII0	Cct4	T-complex protein 1 subunit delta	NA	NA	NA	NA	NA	NA	101	154	143	85	90	116
Q3TII3	Eef1a1	Elongation factor 1-alpha	3	3	NA	1	3	NA	46	88	51	37	26	22
Q3TIQ2	Rpl12	60S ribosomal protein L12	NA	NA	NA	NA	NA	NA	43	NA	NA	NA	NA	NA
Q3TIV6	Kars	Lysine--tRNA ligase	NA	NA	NA	NA	NA	NA	34	39	15	NA	1	1
Q3TIY5	Pkp2	Uncharacterized protein	NA	NA	NA	NA	NA	NA	1	NA	NA	NA	NA	NA
Q3TIZ0	Tuba1c	Tubulin alpha chain	NA	NA	NA	NA	NA	NA	126	123	90	67	68	52
Q3TJ01	Rtcb	RNA-splicing ligase RtcB homolog	NA	NA	NA	NA	NA	NA	NA	1	4	NA	NA	NA
Q3TJ43	Vps35	Vacuolar protein sorting-associated protein 35	NA	NA	NA	NA	NA	NA	11	NA	NA	NA	NA	NA
Q3TJ56	Snd1	Staphylococcal nuclease domain-containing protein 1	NA	NA	NA	NA	NA	NA	1	NA	4	NA	NA	NA
Q3TJH1	Gnai3	Uncharacterized protein	NA	NA	NA	NA	NA	NA	NA	NA	1	NA	NA	2
Q3TJJ5	Prkci	Protein kinase C	NA	NA	NA	NA	NA	NA	NA	1	NA	NA	NA	NA
Q3TJU7	Hsp90aa1	Uncharacterized protein (Fragment)	NA	1	NA	1	2	NA	NA	NA	NA	NA	NA	NA
Q3TK12	Rps17	40S ribosomal protein S17	NA	NA	NA	NA	NA	NA	NA	NA	NA	NA	NA	2
Q3TK73	Rpl7	Uncharacterized protein	NA	NA	NA	1	NA	NA	NA	NA	NA	2	2	NA
Q3TKB9	Hsp90aa1	HATPase_c domain-containing protein (Fragment)	NA	NA	NA	NA	NA	NA	NA	NA	NA	NA	20	40
Q3TKD0	Tnpo1	Transportin-1 (Fragment)	NA	NA	NA	NA	NA	NA	2	2	NA	NA	NA	NA
Q3TL20	Rps2	40S ribosomal protein S2	NA	NA	NA	NA	NA	NA	NA	NA	NA	87	NA	NA
Q3TL58	Skp1	S-phase kinase-associated protein 1	NA	NA	NA	NA	NA	NA	NA	NA	1	NA	NA	NA
Q3TLF6	Mybbp1a	Uncharacterized protein	NA	NA	NA	NA	NA	NA	NA	NA	1	NA	NA	NA
Q3TLH6	Fabp5	FABP domain-containing protein	NA	NA	NA	NA	NA	NA	5	5	6	NA	NA	NA
Q3TLJ0	Capza1	F-actin-capping protein subunit alpha	NA	NA	NA	NA	NA	NA	2	NA	3	NA	NA	NA
Q3TLK3	Ncbp1	MIF4G domain-containing protein	NA	NA	NA	NA	NA	NA	NA	1	NA	NA	NA	NA
Q3TLL6	Eif4a1	RNA helicase	NA	NA	NA	NA	NA	NA	6	6	NA	5	NA	NA
Q3TLY5	Gla	Alpha-galactosidase	NA	NA	NA	NA	NA	NA	NA	NA	1	NA	NA	NA
Q3TM70	Ehd4	Uncharacterized protein	NA	NA	NA	NA	NA	NA	NA	1	NA	NA	NA	NA
Q3TMK0	Heatr1	HEAT repeat-containing protein 1 (Fragment)	NA	NA	NA	NA	NA	NA	1	NA	NA	NA	NA	NA
Q3TMK3	Polr3b	DNA-directed RNA polymerase	NA	NA	NA	NA	NA	NA	NA	1	NA	NA	NA	NA
Q3TNY4	Epc2	E_Pc_C domain-containing protein (Fragment)	NA	NA	NA	NA	NA	NA	1	NA	NA	NA	NA	NA
Q3TP81	Cul4b	Cullin_Nedd8 domain-containing protein (Fragment)	NA	NA	NA	NA	NA	NA	NA	2	NA	NA	NA	NA
Q3TPH3	Usp15	DUSP domain-containing protein	NA	NA	NA	NA	NA	NA	NA	1	NA	1	NA	NA
Q3TPM3	Cul1	Cullin-1 (Fragment)	NA	NA	NA	NA	NA	NA	1	NA	NA	NA	NA	NA
Q3TPP2	Ctps	CTP_synth_N domain-containing protein (Fragment)	NA	NA	NA	NA	NA	NA	NA	2	NA	NA	NA	1
Q3TQ70	Gnb1	Beta1 subnuit of GTP-binding protein	NA	NA	1	NA	NA	NA	NA	NA	NA	NA	NA	NA
Q3TQ74	Ehd4	Dynamin-type G domain-containing protein (Fragment)	1	NA	NA	NA	NA	NA	3	NA	NA	3	NA	NA
Q3TQW0	Tnpo1	Uncharacterized protein (Fragment)	NA	NA	NA	NA	NA	NA	3	NA	NA	1	NA	NA
Q3TQY2	Dctn4	Uncharacterized protein	NA	NA	NA	NA	NA	NA	6	5	2	2	1	3
Q3TR34	Srrm2	CTD domain-containing protein (Fragment)	NA	NA	NA	NA	NA	NA	1	NA	NA	1	NA	NA
Q3TR40	Thbs1	Uncharacterized protein	NA	NA	1	NA	NA	NA	NA	NA	NA	NA	NA	NA
Q3TR46	Rock2	Uncharacterized protein (Fragment)	NA	NA	NA	NA	NA	NA	1	NA	NA	NA	NA	NA
Q3TR98	Vcam1	Uncharacterized protein	NA	NA	NA	NA	NA	NA	1	NA	NA	NA	NA	NA
Q3TRG2	Map3k20	Protein kinase domain-containing protein	NA	NA	NA	NA	NA	NA	1	NA	NA	NA	NA	NA
Q3TRH2	Psmd12	26S proteasome non-ATPase regulatory subunit 12	NA	NA	NA	NA	NA	NA	14	NA	NA	1	NA	NA
Q3TRL7	Atr	Uncharacterized protein	NA	NA	NA	NA	NA	NA	NA	NA	1	NA	NA	NA
Q3TRS8	Mprip	Uncharacterized protein (Fragment)	NA	NA	NA	NA	NA	NA	NA	1	NA	NA	NA	NA
Q3TRW3	Snd1	Staphylococcal nuclease domain-containing protein	NA	NA	NA	NA	NA	NA	NA	5	NA	NA	NA	NA
Q3TS44	Psma1	Proteasome subunit alpha type	NA	NA	NA	NA	NA	NA	86	NA	108	NA	NA	NA
Q3TS50	Hnrnpu	B30.2/SPRY domain-containing protein (Fragment)	NA	NA	NA	NA	NA	NA	2	4	1	2	NA	2
Q3TS63	Asap2	Uncharacterized protein (Fragment)	NA	NA	NA	NA	1	NA	NA	NA	NA	NA	NA	1
Q3TSH0	Anapc4	Uncharacterized protein (Fragment)	NA	NA	NA	NA	NA	NA	1	NA	NA	NA	NA	NA
Q3TSJ4	Eif4a1	RNA helicase	NA	NA	NA	NA	NA	NA	NA	NA	3	NA	1	1
Q3TST6	Col11a1	Fibrillar collagen NC1 domain-containing protein (Fragment)	NA	NA	NA	NA	NA	NA	NA	1	NA	NA	NA	NA
Q3TT04	Ipo5	Importin N-terminal domain-containing protein	NA	NA	NA	NA	NA	NA	NA	NA	7	NA	NA	NA
Q3TT66	Prl	Uncharacterized protein	NA	NA	NA	NA	NA	NA	NA	NA	NA	NA	2	NA
Q3TU49	Polr1a	DNA-directed RNA polymerase subunit (Fragment)	NA	NA	NA	NA	NA	NA	12	9	NA	NA	NA	NA
Q3TU76	Gdf15	TGF_BETA_2 domain-containing protein (Fragment)	NA	NA	NA	NA	NA	NA	NA	1	NA	NA	2	1
Q3TUG2	Polr1a	DNA-directed RNA polymerase subunit (Fragment)	NA	NA	NA	NA	NA	NA	NA	NA	23	NA	NA	NA
Q3TUK6	Rngtt	mRNA-capping enzyme	NA	NA	NA	NA	1	NA	2	NA	5	NA	NA	1
Q3TUR4	Ddx3y	Helicase C-terminal domain-containing protein (Fragment)	NA	NA	NA	NA	NA	NA	NA	NA	1	NA	NA	NA
Q3TUZ9	Gm10481	Gp_dh_C domain-containing protein (Fragment)	NA	NA	NA	NA	NA	1	NA	136	NA	66	118	71
Q3TVC5	Rars	Arginine--tRNA ligase, cytoplasmic (Fragment)	NA	NA	NA	NA	NA	NA	12	15	NA	2	NA	NA
Q3TVV7	Umps	OMPdecase	NA	NA	NA	NA	NA	NA	1	NA	NA	NA	NA	NA
Q3TW28	Tpp2	Tripeptidyl-peptidase 2	NA	NA	NA	NA	NA	NA	49	76	41	24	17	39
Q3TWA2	Cchcr1	Alpha-helical coiled-coil rod protein	NA	NA	NA	NA	NA	NA	NA	NA	NA	NA	1	NA
Q3TWH2	Nnt	Proton-translocating NAD(P)(+) transhydrogenase	NA	NA	NA	NA	NA	NA	NA	NA	1	NA	NA	NA
Q3TWM9	Psap	Uncharacterized protein (Fragment)	NA	NA	NA	NA	NA	NA	9	8	5	NA	NA	NA
Q3TXF9	Atp1a1	Sodium/potassium-transporting ATPase subunit alpha	NA	NA	NA	NA	NA	NA	5	8	10	3	NA	16
Q3TXM9	Srsf9	Uncharacterized protein	1	NA	NA	NA	NA	NA	NA	NA	NA	NA	NA	NA
Q3TXT7	Ruvbl2	RuvB-like helicase	NA	NA	NA	NA	NA	NA	NA	10	4	NA	NA	NA
Q3TXW6	Zfp35	Uncharacterized protein	NA	NA	NA	NA	NA	NA	NA	1	NA	NA	1	NA
Q3TXY2	Tex264	Uncharacterized protein	NA	NA	NA	NA	NA	NA	NA	NA	NA	NA	NA	1
Q3TY51	Kinesin-like protein	Kinesin-like protein	NA	NA	NA	NA	NA	NA	NA	NA	NA	1	NA	NA
Q3TYD2	Nf1	Uncharacterized protein (Fragment)	NA	NA	NA	NA	NA	NA	NA	1	1	NA	NA	NA
Q3TYE5	Lsamp	Limbic system-associated membrane protein	NA	NA	NA	NA	NA	NA	NA	NA	NA	1	NA	NA
Q3TYF5	Ppp1ca	Serine/threonine-protein phosphatase (Fragment)	NA	NA	NA	NA	NA	NA	NA	NA	1	NA	NA	NA
Q3TZ08	Npr2	Guanylate cyclase (Fragment)	NA	NA	NA	NA	NA	NA	NA	NA	3	NA	NA	NA
Q3TZ32	Aars	Alanine--tRNA ligase	NA	NA	NA	NA	NA	NA	NA	21	14	NA	NA	NA
Q3TZI5	Msh2	DNA mismatch repair protein	NA	NA	NA	NA	NA	NA	NA	NA	NA	NA	NA	1
Q3TZP3	Mta2	Uncharacterized protein	NA	NA	NA	NA	NA	NA	6	NA	NA	NA	NA	NA
Q3TZP5	Dcc	Uncharacterized protein (Fragment)	NA	NA	NA	NA	NA	NA	NA	1	NA	NA	NA	NA
Q3TZR9	Atf7	Cyclic AMP-dependent transcription factor ATF-7	NA	NA	NA	NA	NA	NA	1	NA	NA	NA	NA	NA
Q3TZS0	Gata3	GATA-binding factor 3	NA	NA	NA	NA	NA	NA	NA	NA	NA	NA	NA	1
Q3U0D6	Csprs	Uncharacterized protein	NA	NA	NA	NA	NA	NA	NA	1	NA	NA	NA	NA
Q3U0S4	Ctdp1	RNA polymerase II subunit A C-terminal domain phosphatase	NA	NA	NA	NA	NA	NA	NA	NA	1	NA	NA	NA
Q3U0V6	Zfp277	Zinc finger protein 277	NA	NA	NA	NA	NA	NA	NA	NA	1	NA	NA	NA
Q3U105	Marco	SRCR domain-containing protein (Fragment)	NA	NA	NA	NA	NA	NA	NA	1	NA	NA	NA	NA
Q3U151	RNase H domain-containing protein	RNase H domain-containing protein (Fragment)	NA	NA	NA	NA	NA	NA	NA	NA	NA	1	1	NA
Q3U1C2	Ruvbl1	RuvB-like helicase	NA	NA	NA	NA	NA	NA	3	1	3	3	2	6
Q3U2B9	Polr2e	Uncharacterized protein	NA	NA	NA	NA	NA	NA	NA	1	NA	NA	NA	NA
Q3U2F2	Arfgef2	SEC7 domain-containing protein (Fragment)	NA	NA	NA	NA	NA	NA	NA	NA	NA	NA	NA	1
Q3U2G2	Hspa4	Heat shock 70 kDa protein 4	NA	NA	NA	NA	NA	NA	55	52	73	NA	NA	NA
Q3U2K6	Uncharacterized protein	Uncharacterized protein (Fragment)	NA	NA	NA	NA	NA	NA	NA	NA	1	NA	NA	NA
Q3U2N8	Wdfy4	Uncharacterized protein (Fragment)	NA	NA	NA	NA	1	NA	NA	NA	NA	NA	NA	NA
Q3U3A7	Mta3	Metastasis-associated protein MTA3	NA	NA	NA	NA	NA	NA	NA	NA	1	NA	NA	NA
Q3U3A8	Capn2	Calcium-activated neutral proteinase 2	NA	NA	NA	NA	NA	NA	6	18	NA	NA	NA	NA
Q3U3D3	Vars	Valyl-tRNA synthetase	NA	NA	NA	NA	NA	NA	97	118	103	29	11	19
Q3U3Z4	Gcn1	Uncharacterized protein (Fragment)	NA	NA	NA	NA	NA	NA	NA	1	NA	NA	NA	NA
Q3U402	Zfp760	Uncharacterized protein	NA	NA	NA	NA	NA	NA	1	NA	NA	NA	NA	NA
Q3U484	Ddx3y	RNA helicase	NA	NA	NA	NA	NA	NA	1	NA	NA	NA	NA	NA
Q3U4T8	Mcm7	DNA replication licensing factor MCM7	NA	NA	NA	NA	NA	NA	3	NA	NA	NA	NA	NA
Q3U4U6	Cct3	T-complex protein 1 subunit gamma	NA	NA	NA	NA	NA	NA	67	101	66	NA	52	40
Q3U4W8	Usp5	Ubiquitin carboxyl-terminal hydrolase	NA	NA	NA	NA	NA	NA	20	10	27	NA	NA	1
Q3U582	Chd4	DNA helicase (Fragment)	NA	NA	NA	NA	NA	NA	1	NA	NA	NA	NA	NA
Q3U589	Itpa	Uncharacterized protein	NA	NA	NA	NA	NA	NA	NA	1	NA	NA	NA	NA
Q3U5H6	Eif2s3x	Protein-synthesizing GTPase (Fragment)	NA	NA	NA	NA	NA	NA	2	NA	NA	1	NA	NA
Q3U5K0	Lipg	Phospholipase A1	NA	NA	NA	NA	NA	NA	NA	NA	NA	1	NA	NA
Q3U5M8	Psmd3	PCI domain-containing protein	NA	NA	NA	NA	NA	NA	NA	NA	NA	NA	2	4
Q3U5P8	Rps3a1	40S ribosomal protein S3a	NA	NA	NA	NA	NA	NA	NA	3	NA	29	32	45
Q3U605	Ifih1	RNA helicase (Fragment)	NA	NA	NA	NA	NA	NA	1	NA	NA	NA	NA	NA
Q3U613	Pla2g6	Uncharacterized protein	NA	NA	NA	NA	NA	NA	NA	1	NA	NA	NA	NA
Q3U630	Tars	Threonyl-tRNA synthetase	NA	NA	NA	NA	NA	NA	5	NA	NA	NA	NA	NA
Q3U6D2	Rcc1	Uncharacterized protein	NA	NA	NA	NA	NA	NA	NA	1	NA	NA	NA	NA
Q3U6U7	Wars	T1-TrpRS	NA	NA	NA	NA	NA	NA	2	1	4	1	NA	1
Q3U6Y5	Ddx17	Uncharacterized protein (Fragment)	NA	NA	NA	NA	NA	NA	1	NA	NA	NA	NA	NA
Q3U7D2	Rpl15	Ribosomal protein L15	NA	NA	NA	NA	NA	NA	NA	NA	NA	NA	NA	14
Q3U7G3	Capza2	F-actin-capping protein subunit alpha (Fragment)	NA	NA	NA	NA	NA	NA	NA	NA	1	NA	NA	NA
Q3U818	Eif6	Eukaryotic translation initiation factor 6	NA	NA	NA	NA	NA	NA	1	NA	NA	NA	NA	NA
Q3U882	Sec24b	Uncharacterized protein (Fragment)	NA	NA	NA	NA	NA	NA	NA	NA	1	NA	NA	NA
Q3U890	Hars	Histidine--tRNA ligase, cytoplasmic	NA	NA	NA	NA	NA	NA	NA	2	1	NA	NA	NA
Q3U8G7	DNA helicase	DNA helicase	NA	NA	NA	NA	NA	NA	1	NA	NA	NA	NA	NA
Q3U8J6	Ctsc	Pept_C1 domain-containing protein (Fragment)	NA	NA	NA	NA	NA	NA	1	NA	NA	NA	NA	NA
Q3U8N1	Sars	Seryl-tRNA synthetase	NA	NA	NA	NA	NA	NA	NA	6	3	NA	NA	NA
Q3U8W0	Ppp1ca	Protein-serine/threonine phosphatase	NA	NA	NA	NA	NA	NA	1	1	NA	NA	NA	NA
Q3U9A8	Sh3bgrl	SH3 domain-binding glutamic acid-rich-like protein	NA	NA	NA	NA	NA	NA	NA	NA	NA	NA	1	NA
Q3U9L3	Rpl3	Uncharacterized protein	NA	NA	NA	NA	NA	NA	NA	NA	NA	NA	NA	28
Q3U9L4	Nup88	Uncharacterized protein (Fragment)	NA	NA	NA	NA	NA	NA	NA	NA	NA	NA	NA	1
Q3U9N8	Impdh2	Inosine-5'-monophosphate dehydrogenase	NA	NA	NA	NA	NA	NA	6	9	8	NA	NA	NA
Q3U9P0	Rps10	S10_plectin domain-containing protein	NA	NA	NA	NA	NA	NA	NA	NA	NA	NA	NA	1
Q3U9S9	Atp6v1h	Uncharacterized protein (Fragment)	NA	NA	NA	NA	NA	NA	NA	2	NA	NA	NA	NA
Q3UA58	Ywhaz	14_3_3 domain-containing protein (Fragment)	NA	NA	NA	NA	NA	NA	NA	NA	NA	1	NA	NA
Q3UAC2	Rps3a1	40S ribosomal protein S3a	NA	NA	NA	NA	NA	NA	NA	NA	2	NA	NA	NA
Q3UAD6	Hsp90b1	HATPase_c domain-containing protein	NA	NA	NA	NA	NA	NA	56	85	81	6	NA	NA
Q3UAF1	Ddx39a	Uncharacterized protein	NA	NA	NA	NA	NA	NA	NA	2	1	NA	NA	NA
Q3UAZ3	Rars	Arginine--tRNA ligase (Fragment)	NA	NA	NA	NA	NA	NA	NA	8	18	NA	1	1
Q3UBA7	Prkar1a	Uncharacterized protein	NA	NA	NA	NA	NA	NA	1	NA	NA	1	NA	NA
Q3UBI6	Rpl7	Uncharacterized protein	NA	NA	NA	NA	NA	NA	NA	NA	NA	NA	NA	5
Q3UBP6	Actb	Uncharacterized protein	NA	NA	NA	NA	NA	NA	612	NA	708	NA	NA	NA
Q3UBS3	Hp	Haptoglobin	NA	NA	NA	NA	NA	NA	1	NA	NA	NA	NA	NA
Q3UBZ3	Capza2	F-actin-capping protein subunit alpha	NA	NA	NA	NA	NA	NA	3	NA	NA	NA	NA	NA
Q3UCH0	Rpl6	60S ribosomal protein L6	NA	NA	NA	NA	NA	NA	NA	NA	NA	21	8	8
Q3UCI6	Ptcd1	Uncharacterized protein	NA	NA	NA	NA	NA	NA	NA	NA	1	NA	NA	NA
Q3UCL7	Rps3	40S ribosomal protein S3	NA	NA	NA	NA	NA	NA	286	297	NA	320	370	285
Q3UCW0	Tsg101	Uncharacterized protein	NA	NA	NA	NA	NA	NA	NA	NA	NA	3	NA	NA
Q3UD36	Vim	Vimentin (Fragment)	NA	NA	NA	NA	NA	NA	NA	2	NA	NA	NA	NA
Q3UD67	Aars	Alanine--tRNA ligase	NA	NA	NA	NA	NA	NA	16	NA	NA	NA	NA	NA
Q3UD94	Psmc3	AAA domain-containing protein (Fragment)	NA	NA	NA	NA	NA	NA	14	NA	NA	7	NA	NA
Q3UDA2	Dync1i2	WD_REPEATS_REGION domain-containing protein (Fragment)	NA	NA	NA	NA	NA	NA	NA	NA	3	NA	NA	1
Q3UDB1	Cct7	T-complex protein 1 subunit eta (Fragment)	NA	NA	NA	NA	NA	NA	29	58	51	13	10	20
Q3UDD6	Grn	Uncharacterized protein (Fragment)	NA	NA	NA	NA	NA	NA	NA	NA	1	NA	NA	NA
Q3UDJ7	Actn4	Uncharacterized protein	NA	NA	NA	NA	NA	NA	50	58	53	NA	NA	NA
Q3UDN8	Trim28	Uncharacterized protein (Fragment)	NA	NA	NA	NA	NA	NA	NA	NA	2	NA	NA	NA
Q3UDQ3	Ipo13	Importin-13	NA	NA	NA	NA	NA	NA	1	NA	NA	NA	NA	NA
Q3UDX7	Samhd1	Deoxynucleoside triphosphate triphosphohydrolase SAMHD1 (Fragment)	NA	NA	NA	NA	NA	NA	NA	2	NA	NA	NA	NA
Q3UDZ8	Mta2	Uncharacterized protein (Fragment)	NA	NA	NA	NA	NA	NA	NA	2	6	NA	NA	NA
Q3UE22	Rock1	Protein kinase domain-containing protein (Fragment)	NA	NA	NA	NA	NA	NA	NA	NA	NA	1	NA	NA
Q3UE86	Ganab	Gal_mutarotas_2 domain-containing protein (Fragment)	NA	NA	NA	NA	NA	NA	NA	NA	NA	2	2	4
Q3UEA1	Acly	ATP-citrate (pro-S-)-lyase (Fragment)	NA	NA	NA	NA	NA	NA	104	123	79	16	NA	14
Q3UEK3	Eif3a	PCI domain-containing protein (Fragment)	NA	NA	NA	NA	NA	NA	3	5	4	2	NA	2
Q3UEM8	Hspa5	78 kDa glucose-regulated protein (Fragment)	NA	NA	NA	NA	NA	NA	NA	NA	10	NA	NA	NA
Q3UEW3	Sag	Arrestin_C domain-containing protein (Fragment)	NA	NA	2	NA	NA	NA	NA	NA	NA	NA	NA	NA
Q3UF49	Atp1a1	Cation_ATPase_C domain-containing protein (Fragment)	1	NA	NA	NA	NA	NA	NA	NA	NA	NA	NA	NA
Q3UFM8	Chd4	CHDCT2 domain-containing protein	NA	NA	NA	NA	NA	NA	NA	NA	1	NA	NA	NA
Q3UFP0	G370120E05Rik	Uncharacterized protein (Fragment)	NA	NA	NA	NA	NA	NA	NA	NA	1	NA	NA	NA
Q3UFX9	Pde8a	Phosphodiesterase	NA	NA	NA	NA	NA	NA	NA	NA	NA	NA	NA	1
Q3UG16	Ap1m1	Uncharacterized protein	NA	NA	NA	NA	NA	NA	1	NA	NA	NA	NA	NA
Q3UGC8	Pcca	Propanoyl-CoA:carbon dioxide ligase subunit alpha	NA	NA	NA	NA	NA	NA	2	NA	NA	NA	NA	NA
Q3UGE6	Zc3h7b	Uncharacterized protein (Fragment)	NA	NA	NA	NA	NA	NA	NA	1	NA	NA	NA	NA
Q3UGM4	Slc4a2	Anion exchange protein (Fragment)	NA	NA	NA	NA	NA	NA	NA	NA	1	NA	NA	NA
Q3UGU1	Ltbp4	Uncharacterized protein	NA	NA	NA	NA	NA	NA	NA	NA	1	NA	NA	NA
Q3UGV4	Hunk	Hormonally up-regulated neu tumor-associated kinase	NA	NA	NA	NA	NA	NA	NA	NA	1	NA	NA	NA
Q3UGY7	Fbxo41	F-box domain-containing protein	NA	NA	NA	NA	NA	NA	NA	1	NA	NA	NA	NA
Q3UH32	Trrap	Uncharacterized protein (Fragment)	NA	NA	NA	NA	NA	NA	1	NA	NA	NA	NA	NA
Q3UHC8	Acacb	Uncharacterized protein	NA	NA	NA	NA	NA	NA	7	6	13	NA	1	1
Q3UHM0	Pafah1b1	Platelet-activating factor acetylhydrolase IB subunit alpha	NA	NA	NA	NA	NA	NA	NA	2	NA	NA	NA	NA
Q3UHR1	Fn1	Fibronectin (Fragment)	NA	NA	NA	29	27	NA	NA	NA	NA	NA	NA	NA
Q3UHS6	Tln1	Uncharacterized protein	NA	NA	NA	NA	NA	NA	13	14	11	1	NA	NA
Q3UHT6	Fasn	3-hydroxyacyl-[acyl-carrier-protein] dehydratase	NA	NA	NA	NA	NA	NA	405	NA	NA	NA	NA	NA
Q3UHW9	Cfl2	ADF-H domain-containing protein	NA	NA	NA	NA	NA	NA	NA	NA	2	NA	NA	NA
Q3UI35	Sfrp2	Uncharacterized protein	NA	NA	NA	NA	NA	NA	NA	NA	NA	NA	1	1
Q3UI57	Mcm3	DNA helicase	NA	NA	NA	NA	NA	NA	NA	NA	1	NA	NA	NA
Q3UIC3	Ldha	L-lactate dehydrogenase (Fragment)	NA	NA	NA	NA	NA	NA	3	5	2	NA	NA	NA
Q3UIF3	Hsp90aa1	HATPase_c domain-containing protein	NA	NA	NA	NA	NA	NA	492	NA	331	29	NA	NA
Q3UIG0	Eif3e	Eukaryotic translation initiation factor 3 subunit E	NA	NA	NA	NA	NA	NA	NA	NA	4	NA	NA	NA
Q3UIH5	Psmc2	26S proteasome AAA-ATPase subunit RPT1	NA	NA	NA	NA	NA	NA	NA	14	33	14	14	19
Q3UIL5	Maged1	MAGE domain-containing protein	NA	NA	NA	NA	NA	NA	NA	NA	NA	1	NA	NA
Q3UIP2	Pcolce	Uncharacterized protein	NA	NA	NA	NA	NA	NA	NA	NA	2	NA	NA	NA
Q3UIX3	Pkp4	Uncharacterized protein (Fragment)	NA	NA	NA	NA	NA	NA	NA	NA	NA	1	NA	NA
Q3UJ36	Actg2	Uncharacterized protein	NA	NA	NA	NA	NA	NA	NA	NA	NA	360	NA	NA
Q3UJ70	Hmgcs1	3-hydroxy-3-methylglutaryl coenzyme A synthase	NA	NA	NA	NA	NA	NA	2	NA	5	NA	NA	NA
Q3UJL7	Srm	PABS domain-containing protein	NA	NA	NA	NA	NA	NA	1	NA	NA	NA	NA	NA
Q3UJP8	Gart	Trifunctional purine biosynthetic protein adenosine-3	NA	NA	NA	NA	NA	NA	NA	1	1	NA	NA	NA
Q3UJQ2	Hmgcs1	HMG_CoA_synt_C domain-containing protein (Fragment)	NA	NA	NA	NA	NA	NA	28	28	27	NA	NA	NA
Q3UJS0	Rpl8	60S ribosomal protein L8	NA	NA	NA	NA	NA	NA	NA	NA	NA	5	18	15
Q3UK39	Mcm2	DNA replication licensing factor MCM2	NA	NA	NA	NA	NA	NA	3	NA	1	NA	NA	NA
Q3ULG2	Bard1	Uncharacterized protein	NA	NA	NA	NA	NA	NA	NA	2	NA	NA	NA	NA
Q3ULG5	Mcm6	DNA helicase	NA	NA	NA	NA	NA	NA	NA	5	10	NA	NA	NA
Q3ULJ5	Psmd3	PCI domain-containing protein	NA	NA	NA	NA	NA	NA	3	11	3	1	NA	NA
Q3ULJ9	Rangap1	RanGAP1_C domain-containing protein	NA	NA	NA	NA	NA	NA	3	NA	NA	NA	NA	NA
Q3ULM1	Hspa8	Uncharacterized protein	NA	NA	NA	NA	NA	NA	NA	NA	NA	13	NA	NA
Q3ULS2	Smc2	Structural maintenance of chromosomes protein	NA	NA	NA	NA	NA	NA	NA	2	1	NA	NA	1
Q3ULS8	Ddb1	DNA damage-binding protein 1 (Fragment)	NA	NA	NA	NA	NA	NA	1	4	2	NA	NA	NA
Q3ULV2	Adamts20	Peptidase M12B domain-containing protein (Fragment)	NA	NA	NA	NA	NA	NA	1	NA	NA	NA	NA	NA
Q3UM16	Loxl3	Lysyl oxidase homolog	NA	NA	NA	NA	NA	NA	NA	NA	1	NA	NA	NA
Q3UMM1	Tubb6	Tubulin beta chain	NA	NA	NA	NA	NA	NA	NA	20	9	7	NA	15
Q3UNA6	Rbm25	Uncharacterized protein (Fragment)	NA	NA	NA	NA	NA	NA	NA	NA	1	NA	NA	NA
Q3UNF4	Hdac9	Histone deacetylase (Fragment)	NA	NA	NA	NA	NA	NA	1	NA	NA	NA	NA	NA
Q3UNG0	Lamc1	Uncharacterized protein	NA	NA	NA	NA	NA	NA	1	NA	NA	NA	NA	NA
Q3UNG1	Prpf8	Uncharacterized protein (Fragment)	NA	NA	NA	NA	NA	NA	2	NA	NA	1	NA	NA
Q3UNN3	Ptprs	Protein-tyrosine-phosphatase (Fragment)	NA	NA	NA	NA	NA	NA	1	NA	NA	NA	NA	NA
Q3UNW4	Gm10836	Uncharacterized protein	NA	NA	NA	NA	NA	NA	NA	NA	1	NA	NA	1
Q3UPA1	Gna11	Uncharacterized protein	NA	NA	NA	NA	NA	NA	1	NA	NA	NA	NA	NA
Q3UPG3	Gpsm2	Uncharacterized protein	NA	NA	NA	NA	NA	NA	NA	NA	1	NA	NA	1
Q3UPW9	Sbno1	Helicase_C_4 domain-containing protein (Fragment)	NA	NA	NA	NA	NA	NA	1	NA	NA	NA	NA	NA
Q3UPY3	Crygs	Uncharacterized protein	NA	NA	4	NA	NA	1	8	23	27	NA	NA	NA
Q3UQG5	Chd1	Uncharacterized protein	NA	NA	NA	NA	NA	NA	1	NA	1	NA	NA	NA
Q3UQJ1	Vps35	Uncharacterized protein (Fragment)	NA	NA	NA	NA	NA	NA	NA	8	7	NA	NA	NA
Q3UQK2	Stab2	Uncharacterized protein (Fragment)	1	NA	NA	NA	NA	NA	NA	NA	NA	NA	NA	NA
Q3UQZ5	Ppef1	Serine/threonine-protein phosphatase (Fragment)	NA	NA	NA	NA	NA	NA	NA	1	NA	NA	NA	NA
Q3UR16	Nin	Uncharacterized protein (Fragment)	NA	NA	NA	NA	NA	NA	NA	NA	2	2	2	NA
Q3UR42	Dhx9	ATP-dependent RNA helicase A (Fragment)	NA	NA	NA	NA	NA	NA	NA	NA	NA	NA	NA	1
Q3UR88	G3bp1	NTF2 domain-containing protein	NA	NA	NA	NA	NA	NA	2	3	1	1	NA	NA
Q3URS4	Tfcp2	Uncharacterized protein (Fragment)	NA	NA	NA	NA	NA	NA	1	NA	NA	NA	NA	NA
Q3URS7	Gm10856	Uncharacterized protein	NA	NA	NA	NA	NA	NA	1	NA	NA	NA	NA	NA
Q3USD8	Ctnnd2	Uncharacterized protein (Fragment)	NA	NA	NA	NA	NA	NA	1	NA	NA	NA	NA	NA
Q3USZ5	Nop56	Nop domain-containing protein (Fragment)	NA	NA	NA	NA	NA	NA	NA	5	NA	NA	NA	NA
Q3USZ7	Net1	Uncharacterized protein	NA	NA	NA	NA	NA	NA	NA	1	NA	NA	NA	NA
Q3UTC0	B020004J07Rik	RIKEN cDNA B020004J07 gene	NA	NA	NA	NA	NA	NA	NA	1	NA	NA	NA	NA
Q3UTM7	Gm10545	Uncharacterized protein	NA	NA	NA	NA	NA	NA	NA	NA	1	NA	NA	NA
Q3UTT7	Pfas	Uncharacterized protein	NA	NA	NA	NA	NA	NA	3	NA	NA	1	NA	NA
Q3UTY5	Rpgr	X-linked retinitis pigmentosa GTPase regulator	NA	NA	NA	NA	NA	NA	NA	NA	1	NA	NA	NA
Q3UUJ8	A230072I06Rik	RIKEN cDNA A230072I06 gene	NA	NA	NA	NA	NA	NA	NA	1	NA	NA	NA	NA
Q3UUS6	Top2a	DTHCT domain-containing protein	NA	NA	NA	NA	NA	NA	NA	NA	NA	NA	NA	1
Q3UUX3	Polr2c	RPOLD domain-containing protein	NA	NA	NA	NA	NA	NA	NA	3	NA	NA	NA	NA
Q3UVY4	Acly	ATP citrate synthase	NA	NA	NA	NA	NA	NA	NA	NA	NA	NA	6	NA
Q3UW40	Rpl24	TRASH domain-containing protein	NA	NA	NA	NA	NA	NA	NA	NA	NA	4	3	5
Q3UW73	Sgk2	Uncharacterized protein	NA	NA	NA	NA	NA	NA	NA	NA	1	NA	NA	NA
Q3UW96	Calcb	Calcitonin gene-related peptide 2	NA	NA	NA	NA	NA	NA	1	NA	NA	NA	NA	NA
Q3UWC4	Lpin2	Lipin_N domain-containing protein	NA	NA	1	NA	NA	NA	NA	NA	NA	NA	NA	NA
Q3UWK3	Prph2	Uncharacterized protein	5	NA	2	NA	NA	NA	NA	NA	NA	NA	NA	NA
Q3UWK7	Cacna1f	Ca_chan_IQ domain-containing protein (Fragment)	NA	NA	NA	NA	NA	NA	5	12	1	NA	NA	NA
Q3UWP8	Calr	Uncharacterized protein (Fragment)	NA	NA	NA	NA	NA	NA	NA	1	NA	NA	NA	NA
Q3UWS7	Iars	Isoleucyl-tRNA synthetase (Fragment)	NA	NA	NA	NA	NA	NA	11	10	11	3	NA	NA
Q3UWW2	Sec14l3	Uncharacterized protein (Fragment)	NA	NA	NA	NA	NA	NA	NA	NA	1	1	1	1
Q3UX23	Cacna1h	Uncharacterized protein (Fragment)	NA	NA	1	NA	NA	NA	NA	NA	NA	NA	NA	NA
Q3UX26	Pak1ip1	Uncharacterized protein (Fragment)	NA	NA	NA	NA	NA	NA	NA	2	5	NA	NA	NA
Q3UXH8	Hdac2	Histone deacetylase (Fragment)	NA	NA	NA	NA	NA	NA	NA	1	1	NA	NA	1
Q3UXI9	Ilf2	DZF domain-containing protein	NA	NA	NA	NA	NA	NA	4	NA	NA	NA	NA	NA
Q3UXJ8	Flnc	Uncharacterized protein (Fragment)	NA	NA	NA	NA	NA	NA	3	6	1	NA	NA	NA
Q3UYB8	Bfsp2	IF rod domain-containing protein	NA	NA	NA	NA	NA	NA	1	NA	NA	NA	NA	NA
Q3UYT9	Thoc2l	THO complex subunit 2 (Fragment)	NA	NA	NA	NA	NA	NA	NA	NA	1	NA	NA	NA
Q3UZ02	Polr1a	DNA-directed RNA polymerase (Fragment)	NA	NA	NA	NA	NA	NA	NA	NA	NA	1	NA	NA
Q3UZ54	Uncharacterized protein	Uncharacterized protein	NA	NA	NA	NA	NA	NA	NA	2	1	NA	NA	NA
Q3UZ81	Il16	Pro-interleukin-16	NA	NA	NA	NA	NA	NA	1	NA	NA	NA	NA	NA
Q3UZD0	Smarcc1	SWI/SNF complex subunit SMARCC1	NA	NA	NA	NA	NA	NA	1	NA	NA	NA	NA	NA
Q3UZD8	Rangap1	RanGAP1_C domain-containing protein	NA	NA	NA	NA	NA	NA	NA	5	NA	2	NA	NA
Q3UZF0	Prim1	DNA primase	NA	NA	NA	NA	NA	NA	NA	NA	1	NA	NA	NA
Q3UZG4	Aimp1	Aminoacyl tRNA synthase complex-interacting multifunctional protein 1	NA	NA	NA	NA	NA	NA	1	NA	NA	NA	NA	NA
Q3UZT5	Thrb	Uncharacterized protein (Fragment)	NA	NA	NA	NA	NA	NA	1	NA	NA	NA	NA	NA
Q3V0C6	Spata31	Uncharacterized protein	NA	NA	NA	NA	NA	NA	NA	NA	NA	1	NA	NA
Q3V0M9	Cdsn	Corneodesmosin	NA	NA	NA	NA	NA	NA	NA	NA	NA	1	NA	NA
Q3V0N0	Pom121l2	Novel protein similar to nuclear envelope pore membrane protein POM121	NA	NA	NA	NA	NA	NA	NA	NA	NA	NA	1	NA
Q3V0X8	Gm10518	Uncharacterized protein (Fragment)	NA	NA	NA	NA	NA	NA	NA	NA	2	2	NA	NA
Q3V1T8	Nr1h4	Uncharacterized protein	NA	NA	NA	NA	NA	NA	NA	NA	NA	1	NA	NA
Q3V226	Rps6ka2	Protein kinase domain-containing protein	NA	NA	NA	NA	NA	NA	NA	1	NA	NA	NA	NA
Q3V239	Fam193a	Uncharacterized protein (Fragment)	NA	NA	NA	NA	NA	NA	NA	1	1	NA	NA	NA
Q3V275	Car15	Carbonic anhydrase	NA	NA	NA	NA	NA	NA	1	1	NA	NA	NA	NA
Q3V2G6	Tpd52l1	Tumor protein D53	NA	NA	NA	NA	NA	NA	1	NA	NA	NA	NA	NA
Q3V2N5	Sntb2	Uncharacterized protein	NA	NA	NA	NA	NA	NA	1	NA	NA	NA	NA	NA
Q3V3G0	Slc22a30	Solute carrier family 22, member 30	NA	NA	NA	NA	NA	NA	1	NA	NA	NA	NA	NA
Q3V3M8	Peptidase_S8 domain-containing protein	Peptidase_S8 domain-containing protein	NA	NA	NA	NA	2	NA	NA	NA	NA	NA	NA	NA
Q497E1	Rps23	40S ribosomal protein S23	NA	NA	NA	NA	NA	NA	1	NA	NA	14	NA	NA
Q497E9	Rps8	40S ribosomal protein S8	NA	NA	NA	NA	2	NA	NA	2	NA	23	43	32
Q497N1	Rps26	40S ribosomal protein S26	NA	NA	NA	2	NA	NA	3	NA	NA	61	47	13
Q497W9	Dhx15	RNA helicase	NA	NA	NA	NA	NA	NA	NA	6	NA	NA	NA	NA
Q49S98	Slc32a1	Vasicular inhibitory amino acid transporter 10D	NA	NA	NA	NA	NA	NA	1	NA	NA	1	NA	NA
Q4FE56	Usp9x	Probable ubiquitin carboxyl-terminal hydrolase FAF-X	NA	NA	NA	NA	NA	NA	3	5	4	NA	NA	1
Q4FJQ0	Rab7	Rab7	NA	NA	NA	NA	NA	NA	2	NA	NA	NA	NA	NA
Q4FJX7	Tinagl1	Lcn7 protein	NA	NA	NA	NA	1	NA	NA	4	NA	NA	3	3
Q4FJZ2	Kpna6	Importin subunit alpha	NA	NA	NA	NA	NA	NA	NA	1	NA	NA	NA	NA
Q4FZK2	Eef1g	Elongation factor 1-gamma	NA	NA	NA	NA	NA	NA	53	69	52	NA	NA	18
Q4KL11	Enkur	Enkurin domain-containing protein	NA	NA	NA	NA	NA	NA	1	NA	NA	NA	NA	NA
Q4KL82	Rfc2	Replication factor C (Activator 1) 2	NA	NA	NA	NA	NA	NA	NA	NA	NA	1	NA	NA
Q4U221	Mageb1	Melanoma antigen, family B, 1	NA	NA	NA	NA	NA	NA	NA	NA	NA	1	NA	NA
Q4V9U8	Pigl	N-acetylglucosaminylphosphatidylinositol deacetylase	NA	NA	NA	NA	NA	NA	NA	NA	1	NA	NA	NA
Q4VA10	Rhof	Ras homolog gene family, member f	NA	NA	NA	NA	NA	NA	NA	NA	1	NA	NA	NA
Q4VA28	Rpl21	60S ribosomal protein L21	NA	NA	NA	NA	NA	NA	1	NA	NA	3	NA	NA
Q4VAG4	Rpl22	Ribosomal protein L22	NA	NA	NA	NA	NA	NA	6	4	NA	1	1	1
Q52KP0	Rpl38	60S ribosomal protein L38	NA	NA	NA	NA	NA	NA	NA	2	1	NA	NA	1
Q52L53	Psmc4	26S proteasome AAA-ATPase subunit RPT3 (Fragment)	NA	NA	NA	NA	NA	NA	2	1	2	1	NA	1
Q52L78	Cryab	Alpha(B)-crystallin	NA	NA	9	3	NA	NA	9	NA	6	NA	NA	NA
Q52L98	Agrn	Agrn protein (Fragment)	NA	NA	NA	2	NA	NA	NA	NA	NA	NA	NA	NA
Q53ZY9	Nr0b1	Nuclear receptor DAX-1	NA	NA	NA	NA	NA	NA	NA	NA	1	NA	NA	NA
Q542F1	Clic1	Chloride intracellular channel protein	NA	NA	NA	NA	NA	NA	7	NA	NA	2	NA	NA
Q542I9	Psmc1	AAA domain-containing protein	NA	NA	NA	NA	NA	NA	17	29	7	4	9	7
Q542J9	Pcna	Proliferating cell nuclear antigen	NA	NA	NA	NA	NA	NA	7	2	2	1	NA	NA
Q542X7	Cct2	CCT-beta	NA	NA	NA	NA	NA	NA	36	97	81	26	28	42
Q542Y0	Nqo1	Uncharacterized protein	NA	NA	NA	NA	NA	NA	NA	1	NA	NA	NA	NA
Q543D4	Htr2a	5-hydroxytryptamine receptor 2A	NA	NA	NA	NA	NA	NA	NA	NA	NA	NA	NA	1
Q543K9	Pnp	Purine nucleoside phosphorylase	NA	NA	NA	NA	NA	NA	NA	1	NA	NA	NA	NA
Q543R4	Cpe	Uncharacterized protein	NA	NA	NA	NA	NA	NA	NA	1	NA	NA	NA	NA
Q543W6	Chek2	Uncharacterized protein	NA	NA	NA	NA	NA	NA	NA	NA	1	NA	NA	NA
Q544C3	Stard3	START domain-containing protein 3	NA	NA	NA	NA	NA	NA	1	NA	NA	NA	NA	NA
Q544C4	Gpr83	G_PROTEIN_RECEP_F1_2 domain-containing protein	NA	NA	NA	NA	NA	NA	NA	NA	1	NA	NA	NA
Q544D4	Sgcd	Sarcoglycan, delta (Dystrophin-associated glycoprotein)	NA	NA	NA	NA	NA	NA	NA	NA	1	NA	NA	NA
Q544T5	Dhfr	Dihydrofolate reductase	NA	NA	NA	NA	NA	NA	1	NA	NA	NA	NA	NA
Q544Y7	Cfl1	Cofilin, non-muscle isoform	NA	NA	NA	1	NA	NA	NA	NA	NA	NA	NA	NA
Q545E8	Dck	dNK domain-containing protein	NA	NA	NA	NA	NA	NA	NA	1	NA	NA	NA	NA
Q545F4	Hspb1	Heat shock 27 kDa protein	NA	NA	NA	NA	NA	NA	6	NA	1	7	NA	NA
Q545F8	Rps4x	40S ribosomal protein S4	NA	NA	NA	1	NA	NA	4	5	NA	16	17	29
Q545G0	Psmb3	Proteasome subunit beta	NA	NA	NA	NA	NA	NA	4	NA	NA	2	NA	NA
Q545I9	S100a6	Protein S100	NA	NA	NA	NA	NA	NA	1	1	1	NA	NA	1
Q545N1	C184	C184S protein	NA	NA	NA	NA	NA	NA	7	13	3	NA	NA	4
Q546G4	Alb	Serum albumin	1	NA	NA	NA	NA	NA	NA	1	NA	NA	NA	NA
Q546R1	Ppm1b	Protein-serine/threonine phosphatase	NA	NA	NA	NA	NA	NA	1	NA	1	NA	NA	NA
Q549A5	Clu	Clusterin	NA	NA	NA	NA	NA	NA	224	362	267	5	NA	18
Q564E8	Rpl4	60S ribosomal protein L4	NA	NA	NA	NA	NA	NA	NA	NA	NA	39	NA	NA
Q569M7	Cryaa	Cryaa protein	140	26	37	19	31	8	65	88	83	NA	NA	2
Q569Z0	Rpl14-ps1	60S ribosomal protein L14	NA	NA	NA	NA	NA	NA	NA	NA	NA	7	NA	NA
Q571B2	Grb7	MKIAA4028 protein (Fragment)	NA	NA	NA	NA	NA	NA	1	NA	NA	NA	NA	NA
Q571K5	Tnpo3	MKIAA4133 protein (Fragment)	NA	NA	NA	NA	NA	NA	1	NA	NA	NA	NA	NA
Q571L9	Celsr1	MKIAA4041 protein (Fragment)	NA	NA	NA	NA	NA	NA	NA	NA	NA	1	NA	NA
Q58E35	Rplp1	Ribosomal protein, large, P1	NA	NA	NA	NA	NA	NA	4	2	2	NA	NA	NA
Q58E59	Sf3a3	Splicing factor 3a, subunit 3	NA	NA	NA	NA	NA	NA	NA	3	1	2	NA	NA
Q58ET1	Rpl7a	60S ribosomal protein L7a	NA	NA	NA	NA	NA	NA	NA	NA	4	NA	NA	NA
Q5BJ30	Per1	Per1 protein	NA	NA	NA	NA	NA	NA	NA	1	NA	NA	NA	NA
Q5BL09	Npm1	Npm1 protein	NA	NA	NA	NA	NA	NA	NA	2	2	NA	NA	NA
Q5BLK1	Rps6	40S ribosomal protein S6	NA	NA	NA	1	3	NA	3	4	4	69	69	74
Q5BLK2	Rps20	40S ribosomal protein S20	NA	NA	NA	NA	1	NA	3	9	NA	33	17	18
Q5D098	Psmb7	Proteasome subunit beta (Fragment)	NA	NA	NA	NA	NA	NA	1	NA	NA	NA	NA	NA
Q5DTH1	Ube3a	MKIAA4216 protein (Fragment)	NA	NA	NA	NA	NA	NA	NA	8	NA	NA	NA	NA
Q5DTI5	Zfp783	MKIAA4190 protein (Fragment)	NA	NA	NA	NA	NA	NA	NA	NA	1	NA	NA	NA
Q5DTP4	Dennd4a	MKIAA4082 protein (Fragment)	NA	NA	NA	NA	NA	NA	NA	1	NA	NA	NA	NA
Q5DTR4	Sptbn1	MKIAA4049 protein (Fragment)	NA	NA	NA	NA	NA	NA	NA	NA	14	1	NA	NA
Q5DTS3	Septin7	Septin-7 (Fragment)	NA	NA	NA	NA	NA	NA	NA	NA	2	NA	NA	NA
Q5DTS8	Mcm4	DNA helicase (Fragment)	NA	NA	NA	NA	NA	NA	2	NA	2	1	NA	NA
Q5DTW4	Dnah5	MKIAA1603 protein (Fragment)	NA	NA	NA	NA	NA	NA	1	NA	NA	NA	NA	NA
Q5DTZ4	Adamtsl3	MKIAA1233 protein (Fragment)	NA	NA	NA	NA	NA	NA	1	NA	NA	NA	NA	NA
Q5EBH4	Dmgdh	Dimethylglycine dehydrogenase	NA	NA	NA	NA	NA	NA	1	NA	NA	NA	NA	NA
Q5F222	RP23-56I20.8-001	Dynein, axonemal, heavy chain 2	NA	NA	NA	NA	NA	NA	NA	NA	NA	1	NA	NA
Q5FW97	EG433182	2-phospho-D-glycerate hydro-lyase	NA	3	NA	2	NA	NA	34	31	31	NA	NA	5
Q5FWB6	Rplp0	60S acidic ribosomal protein P0	NA	NA	NA	NA	NA	NA	86	102	NA	2	NA	NA
Q5FWB7	Aldoa	Fructose-bisphosphate aldolase	NA	NA	NA	NA	NA	NA	4	NA	6	NA	NA	NA
Q5GQ64	Sncg	Gamma-synuclein (Fragment)	NA	NA	NA	NA	NA	NA	1	NA	NA	NA	NA	NA
Q5KTQ0	H2-K	MHC class I heavy chain H2-K	NA	NA	NA	NA	NA	NA	NA	NA	20	NA	NA	10
Q5KU03	Gsk3b	Glycogen synthase kinase-3 beta	NA	NA	NA	NA	NA	NA	NA	NA	1	NA	NA	NA
Q5M8M8	Rpl29	60S ribosomal protein L29	NA	NA	NA	NA	NA	NA	NA	NA	NA	4	1	NA
Q5M9J8	Rpl28	60S ribosomal protein L28	NA	NA	NA	NA	NA	NA	NA	1	2	1	1	4
Q5M9L1	Rpl36	60S ribosomal protein L36	NA	NA	NA	NA	NA	NA	NA	NA	NA	1	NA	1
Q5M9L7	Rps17	40S ribosomal protein S17	NA	NA	NA	NA	NA	NA	13	NA	NA	32	NA	NA
Q5M9N6	Rpl37a	Rpl37a protein	NA	NA	NA	NA	NA	NA	NA	NA	1	NA	1	4
Q5NBZ3	Drg1	OBG-type G domain-containing protein	NA	NA	NA	NA	NA	NA	1	NA	NA	NA	NA	NA
Q5NC63	Gm12258	Predicted gene 12258	NA	NA	NA	NA	NA	NA	NA	NA	NA	NA	NA	1
Q5NC79	Nme1	Nucleoside diphosphate kinase A	NA	NA	NA	NA	NA	NA	1	NA	NA	NA	NA	NA
Q5NTY0	Dnaja1	DnaJ (Hsp40) homolog, subfamily A, member 1	NA	NA	NA	NA	NA	NA	NA	3	1	NA	NA	NA
Q5R252	Ptch1	Tumor suppressor patched medium isoform (Fragment)	NA	NA	NA	NA	NA	NA	NA	NA	1	NA	NA	NA
Q5RKP0	Vat1	Vat1 protein (Fragment)	NA	NA	NA	NA	NA	NA	2	NA	1	NA	NA	NA
Q5RKP3	Rpl13	60S ribosomal protein L13	NA	NA	NA	1	2	NA	NA	7	3	43	28	45
Q5RL55	Abcf1	ATP-binding cassette, sub-family F (GCN20), member 1	NA	NA	NA	NA	NA	NA	NA	NA	1	NA	1	NA
Q5SS40	Ywhae	14_3_3 domain-containing protein	NA	NA	NA	NA	NA	NA	1	NA	NA	NA	NA	NA
Q5SV54	Pard3b	Ortholog of human amyotrophic lateral sclerosis 2 (Juvenile) chromosome region, candidate 19 (ALS2CR19)	NA	NA	NA	NA	NA	NA	NA	NA	NA	1	NA	NA
Q5SVS9	Zfp287	Zinc finger protein 287	NA	NA	NA	NA	NA	NA	NA	1	NA	NA	NA	NA
Q5SX49	Pfn1	Profilin	NA	NA	NA	1	NA	NA	NA	NA	NA	NA	NA	NA
Q5SXR6	Cltc	Clathrin heavy chain	NA	NA	NA	NA	NA	NA	35	74	32	29	19	49
Q5SYH8	Evi2a	Protein EVI2A (Fragment)	NA	NA	NA	1	NA	NA	NA	NA	NA	NA	NA	NA
Q5SZA3	H1f2	Histone cluster 1, H1c	1	NA	NA	NA	NA	NA	NA	1	NA	NA	NA	1
Q5U413	Igh	Igh protein	NA	NA	NA	NA	NA	NA	1	NA	NA	NA	NA	NA
Q5U471	Osbpl7	Osbpl7 protein	NA	NA	NA	NA	NA	NA	NA	NA	NA	NA	NA	1
Q5U4C5	Ipo4	Importin-4	NA	NA	NA	NA	NA	NA	11	8	11	NA	NA	NA
Q5YLW3	Rps3	40S ribosomal protein S3	NA	NA	NA	NA	NA	NA	NA	NA	159	NA	NA	NA
Q5ZGW9	CXCR1	CXC chemokine receptor 1 (Fragment)	NA	NA	NA	NA	NA	NA	1	NA	NA	NA	NA	NA
Q60638	Map4	Microtubule-associated protein 4 (Fragment)	NA	NA	NA	NA	NA	NA	1	NA	NA	NA	NA	NA
Q60907	Zfp7	KRAB-zinc finger protein 65 (Fragment)	NA	NA	NA	NA	NA	NA	NA	NA	NA	1	NA	NA
Q61445	Beta-A3/A1-crystallin	Beta-A3/A1-crystallin (Fragment)	NA	NA	NA	NA	1	NA	NA	NA	NA	NA	NA	NA
Q61613	Orm1	Alpha-1-acid glycoprotein (AGP) (Fragment)	NA	NA	NA	NA	NA	NA	NA	NA	1	NA	NA	NA
Q61649	Alpha-globin mRNA	Alpha-globin mRNA (Fragment)	NA	NA	NA	NA	NA	NA	1	NA	NA	NA	NA	NA
Q61667	Histone H4	Histone H4 (Fragment)	NA	NA	NA	NA	NA	NA	2	NA	1	NA	NA	3
Q61895	H2-K1	mRNA	NA	NA	NA	NA	NA	NA	NA	22	NA	NA	NA	10
Q63930	Scgb1b27	Salivary androgen-binding protein alpha subunit (Fragment)	NA	NA	NA	NA	NA	NA	1	NA	NA	NA	NA	NA
Q63ZW9	Copa	Copa protein (Fragment)	NA	NA	NA	NA	NA	NA	9	NA	NA	2	1	NA
Q640N8	Mip	Major intrinsic protein of eye lens fiber	NA	NA	NA	NA	NA	NA	1	NA	NA	NA	NA	NA
Q641K6	Pcdha1	Pcdha1 protein	NA	NA	NA	NA	NA	NA	1	NA	NA	NA	NA	NA
Q642K0	Myl6	Myl6 protein	NA	NA	NA	NA	NA	NA	10	NA	NA	NA	NA	NA
Q64369	Igf2bp3	Y-box binding protein (Fragment)	NA	NA	NA	NA	NA	NA	2	2	2	NA	NA	NA
Q66JU1	Eif3c	Eif3c protein (Fragment)	NA	NA	NA	NA	NA	NA	19	21	27	NA	2	9
Q66JU6	H2-K1	H2-K1 protein	NA	NA	NA	NA	NA	NA	NA	NA	NA	3	NA	NA
Q684Q2	L1cam	L1 cell adhesion molecule (Fragment)	NA	NA	NA	NA	NA	NA	NA	1	NA	NA	NA	NA
Q69Z43	Nek9	MKIAA1995 protein (Fragment)	NA	NA	NA	NA	NA	NA	NA	NA	1	NA	NA	NA
Q69Z59	Atp8b4	Phospholipid-transporting ATPase (Fragment)	NA	NA	NA	NA	NA	NA	4	NA	NA	NA	NA	NA
Q69ZJ6	Ptgfrn	MKIAA1436 protein (Fragment)	NA	NA	NA	NA	NA	NA	NA	NA	NA	NA	NA	2
Q6A0C7	Rab21	Ras-related protein Rab-21 (Fragment)	NA	NA	NA	NA	NA	NA	NA	NA	1	NA	NA	NA
Q6DIB8	Atp2b2	Atp2b2 protein	NA	NA	NA	NA	NA	NA	NA	1	NA	NA	NA	NA
Q6DLW7	Ahr	Aryl hydrocarbon receptor (Fragment)	NA	NA	NA	NA	NA	NA	NA	NA	NA	1	NA	NA
Q6F4J0	Tubg2	Tubulin gamma chain	NA	NA	NA	NA	NA	NA	1	NA	NA	1	NA	NA
Q6GR78	App	ABPP	NA	NA	NA	NA	NA	NA	2	NA	NA	NA	NA	NA
Q6IRT4	Eif3f	Eukaryotic translation initiation factor 3 subunit F	NA	NA	NA	NA	NA	NA	4	NA	NA	NA	NA	NA
Q6KAM8	Flna	MFLJ00343 protein (Fragment)	NA	NA	NA	NA	NA	NA	NA	NA	NA	NA	NA	2
Q6KAP6	mFLJ00226	MFLJ00226 protein (Fragment)	NA	NA	NA	NA	NA	NA	NA	NA	NA	NA	1	NA
Q6LBL9	Tcp-1	T-complex polypeptide 1 (Fragment)	NA	NA	NA	NA	NA	NA	11	NA	NA	8	NA	NA
Q6NSP6	Fbrsl1	2410025L10Rik protein (Fragment)	NA	NA	NA	NA	NA	NA	NA	1	NA	NA	NA	NA
Q6NWV5	Pgam1	Pgam1 protein (Fragment)	NA	NA	1	NA	NA	NA	NA	NA	NA	NA	NA	NA
Q6NXX7	Abce1	Abce1 protein (Fragment)	NA	NA	NA	NA	NA	NA	3	10	1	1	NA	2
Q6NXZ0	Dpp3	Dipeptidyl peptidase 3	NA	NA	NA	NA	NA	NA	1	NA	NA	NA	NA	NA
Q6P214	Zmym1	Zmym1 protein	NA	NA	NA	1	NA	NA	3	NA	NA	NA	NA	NA
Q6P238	Zfp212	Uncharacterized protein (Fragment)	NA	NA	NA	NA	NA	NA	NA	NA	1	NA	NA	NA
Q6P3F6	Nfatc2	Nfatc2 protein	NA	NA	NA	NA	NA	NA	NA	3	2	3	1	NA
Q6P550	Bmp1	Metalloendopeptidase (Fragment)	NA	NA	NA	NA	NA	NA	NA	1	2	NA	NA	NA
Q6P6F8	Ms4a6c	Ms4a6c protein	NA	NA	NA	NA	NA	NA	NA	3	NA	1	NA	1
Q6P7V2	Phf20l1	PHD finger protein 20-like protein 1 (Fragment)	NA	NA	NA	NA	NA	NA	NA	1	NA	NA	NA	NA
Q6P7V9	Smc4	Structural maintenance of chromosomes protein	NA	NA	NA	NA	NA	NA	NA	1	NA	NA	NA	NA
Q6P8M4	Rai2	Retinoic acid induced 2	NA	NA	NA	NA	NA	NA	NA	1	NA	NA	NA	NA
Q6P9L9	Eef2	Eef2 protein (Fragment)	NA	NA	NA	NA	NA	NA	18	48	34	NA	2	7
Q6P9Q2	Polr1b	DNA-directed RNA polymerase subunit beta	NA	NA	NA	NA	NA	NA	3	NA	NA	NA	NA	NA
Q6PA04	Sptan1	Spna2 protein (Fragment)	NA	NA	NA	NA	NA	NA	NA	NA	NA	1	NA	NA
Q6PCM6	Agrn	Agrin (Fragment)	NA	NA	NA	NA	NA	NA	NA	NA	NA	12	4	NA
Q6PDD2	Cacna1d	Cacna1d protein	NA	NA	NA	NA	NA	NA	NA	2	NA	NA	NA	NA
Q6PE78	Vps26a	Vps26a protein	NA	NA	NA	NA	NA	NA	NA	NA	1	NA	NA	NA
Q6PER1	Myo18a	Myo18a protein (Fragment)	NA	NA	NA	NA	NA	NA	NA	NA	NA	NA	NA	1
Q6PET9	Top2a	DNA topoisomerase 2 (Fragment)	NA	NA	NA	NA	NA	NA	1	NA	NA	NA	NA	NA
Q6PFE0	Nkx2-1	NK2 homeobox 1	NA	1	NA	NA	NA	NA	NA	NA	NA	NA	NA	NA
Q6PG66	Itgax	Itgax protein	NA	NA	NA	NA	NA	NA	NA	NA	NA	NA	1	NA
Q6PH97	Cabin1	Cabin1 protein (Fragment)	NA	NA	NA	NA	NA	NA	1	NA	NA	NA	NA	NA
Q6PHC1	Eno1	2-phospho-D-glycerate hydro-lyase	NA	NA	5	NA	NA	NA	NA	NA	NA	2	NA	NA
Q6PHZ1	Rpl17	60S ribosomal protein L17	NA	NA	NA	NA	NA	NA	NA	2	NA	22	4	12
Q6PKB0	Fcgrt	Fcgrt protein	NA	NA	NA	NA	NA	NA	NA	1	NA	NA	NA	NA
Q6R5E2	Gm11426	Uncharacterized protein	NA	NA	NA	NA	NA	NA	1	NA	2	NA	NA	NA
Q6R5F5	Gm6994	Uncharacterized protein	NA	NA	NA	NA	NA	NA	NA	1	NA	NA	NA	NA
Q6UDR4	Prr14l	EMO2	NA	NA	NA	NA	NA	NA	1	1	NA	NA	NA	NA
Q6XK24	Mgam	Membrane-bound maltase-glucoamylase (Fragment)	NA	NA	NA	NA	NA	NA	NA	NA	NA	1	NA	NA
Q6ZPT2	Lars	Leucyl-tRNA synthetase (Fragment)	NA	NA	NA	NA	NA	NA	NA	NA	NA	NA	NA	8
Q6ZQ46	Sash1	MKIAA0790 protein (Fragment)	NA	NA	1	NA	NA	NA	3	2	3	2	1	NA
Q6ZQ53	Cpne1	MKIAA0765 protein (Fragment)	NA	NA	NA	NA	NA	NA	NA	NA	1	NA	NA	NA
Q6ZQ59	Dst	MKIAA0728 protein (Fragment)	NA	NA	NA	NA	NA	NA	1	NA	NA	NA	NA	NA
Q6ZQA1	mKIAA0533	MKIAA0533 protein (Fragment)	NA	NA	NA	2	3	NA	2	5	6	14	13	17
Q6ZQC8	Ttc37	MKIAA0372 protein (Fragment)	NA	NA	NA	NA	NA	NA	2	NA	NA	NA	NA	NA
Q6ZQM3	Samhd1	cDNA fis, clone TRACH3010757, highly similar to Interferon-gamma inducible protein MG11	NA	NA	NA	NA	NA	NA	1	NA	NA	NA	NA	NA
Q6ZWX1	Rpl35a	60S ribosomal protein L35a	NA	NA	NA	NA	NA	NA	NA	NA	2	NA	NA	NA
Q6ZWZ6	Rps12	40S ribosomal protein S12	NA	NA	NA	NA	NA	NA	NA	NA	NA	1	NA	NA
Q71LX8	Hsp90ab1	Heat shock protein 84b	NA	NA	NA	NA	NA	NA	501	477	397	39	29	47
Q78KN5	Lrrc40	Lrrc40 protein	1	NA	NA	NA	NA	NA	1	NA	NA	2	NA	NA
Q792Z1	Try10	Trypsin 10	NA	NA	NA	NA	NA	NA	NA	NA	NA	1	NA	NA
Q793L1	Emc9	Cgi112	NA	NA	NA	NA	NA	NA	NA	NA	NA	NA	1	NA
Q7M6W1	Rtn1	Reticulon	NA	NA	NA	NA	NA	NA	NA	NA	1	NA	NA	NA
Q7TMG2	Snrnp200	Snrnp200 protein (Fragment)	NA	NA	NA	NA	NA	NA	3	NA	1	1	NA	NA
Q7TMI0	Psmd11	Psmd11 protein (Fragment)	NA	NA	NA	NA	NA	NA	4	NA	NA	NA	NA	NA
Q7TMQ8	Trim47	Trim47 protein (Fragment)	NA	NA	NA	NA	NA	NA	NA	2	3	NA	NA	NA
Q7TMT3	Thbs2	Thrombospondin 2	NA	NA	NA	NA	NA	NA	9	21	NA	NA	NA	NA
Q7TMX2	Ppp2r1a	Protein phosphatase 2 (Formerly 2A), regulatory subunit A (PR 65), alpha isoform	NA	NA	NA	NA	NA	NA	3	NA	1	NA	NA	NA
Q7TMX6	Exosc7	Exosome component 7	NA	NA	NA	NA	NA	NA	1	NA	NA	NA	NA	NA
Q7TN23	Ipo5	Ipo5 protein (Fragment)	NA	NA	NA	NA	NA	NA	4	4	NA	NA	NA	NA
Q7TNA5	Msh4	MutS homolog 4 variant gamma	NA	NA	NA	NA	NA	NA	NA	NA	NA	NA	NA	1
Q7TNP7	Zfp763	Uncharacterized protein	NA	NA	1	NA	NA	NA	NA	1	2	NA	1	NA
Q7TNQ1	Copg1	Coatomer protein complex, subunit gamma	NA	NA	NA	NA	NA	NA	7	5	13	NA	1	3
Q7TPD9	Arpc4	Actin-related protein 2/3 complex subunit 4	NA	NA	NA	NA	NA	NA	1	NA	NA	NA	NA	NA
Q7TPQ7	Ppp2r2a	Serine/threonine-protein phosphatase 2A 55 kDa regulatory subunit B (Fragment)	NA	NA	NA	NA	NA	NA	1	NA	NA	NA	NA	NA
Q7TPU1	Dnaaf5	Heatr2 protein	NA	NA	NA	NA	NA	NA	1	NA	NA	NA	NA	NA
Q7TQJ6	Myh9	Myh9 protein (Fragment)	NA	NA	NA	NA	NA	NA	NA	NA	2	NA	NA	NA
Q7TQM2	scFv 6H8	ScFv 6H8 protein (Fragment)	NA	NA	NA	NA	NA	NA	1	NA	NA	NA	NA	NA
Q7TRH9	Olfr792	Olfactory receptor	NA	NA	1	NA	NA	NA	NA	NA	NA	NA	NA	NA
Q7TRS1	Olfr583	Olfactory receptor	NA	NA	NA	NA	NA	NA	1	NA	NA	NA	NA	NA
Q7TSI4	Polr3a	DNA-directed RNA polymerase subunit	NA	NA	NA	NA	NA	NA	1	NA	NA	NA	NA	NA
Q7TSZ3	Lars	Leucyl-tRNA synthetase	NA	NA	NA	NA	NA	NA	34	25	23	2	5	9
Q80T90	Focad	MKIAA1797 protein (Fragment)	NA	NA	NA	NA	NA	NA	1	NA	NA	NA	NA	NA
Q80TN1	Camk2a	Calcium/calmodulin-dependent protein kinase (Fragment)	NA	NA	NA	NA	NA	NA	1	NA	NA	NA	NA	1
Q80TQ0	Mlxip	MKIAA0867 protein (Fragment)	NA	NA	NA	NA	NA	NA	NA	1	NA	NA	NA	NA
Q80U36	Dync1h1	MKIAA0325 protein (Fragment)	NA	NA	NA	NA	NA	NA	3	NA	1	4	NA	NA
Q80U60	Pxdn	Peroxidase (Fragment)	NA	NA	NA	NA	NA	NA	NA	171	146	8	NA	NA
Q80UL3	Galk1	Galactokinase 1	NA	NA	NA	NA	NA	NA	3	2	NA	1	NA	NA
Q80UU0	Gosr1	Golgi SNAP receptor complex member 1	NA	NA	NA	NA	NA	NA	NA	1	NA	NA	NA	NA
Q80VE6	Nup205	Nup205 protein (Fragment)	NA	NA	NA	NA	NA	NA	NA	NA	NA	NA	1	NA
Q80VY6	Cdh3	Cdh3 protein (Fragment)	NA	NA	NA	NA	NA	NA	1	NA	3	1	NA	NA
Q80W41	Ncapd3	Condensin-2 complex subunit D3	NA	NA	NA	NA	NA	NA	NA	2	NA	1	NA	NA
Q80Y09	Pdcd6ip	Pdcd6ip protein	2	1	1	2	NA	NA	26	16	4	23	10	10
Q80Y52	Hsp90aa1	Heat shock protein 90, alpha (Cytosolic), class A member 1	NA	NA	NA	NA	NA	NA	NA	447	NA	NA	NA	NA
Q80YX0	Tnc	Tenascin	NA	NA	NA	1	NA	NA	NA	NA	NA	NA	NA	NA
Q80ZS7	BC048507	Dynein light chain	NA	NA	NA	NA	NA	NA	NA	1	NA	NA	NA	NA
Q80ZV2	Tubb5	Tubb5 protein (Fragment)	NA	NA	NA	NA	NA	NA	113	NA	70	56	NA	NA
Q80ZZ5	Ryr2	Ryanodine receptor 2	NA	NA	NA	NA	NA	NA	6	NA	NA	1	NA	1
Q810B1	Mrpl43	Mitochondrial ribosomal protein L43 (Fragment)	NA	NA	NA	NA	NA	NA	NA	1	NA	NA	NA	NA
Q810B2	Sema4f	Semaphorin M (Fragment)	NA	NA	NA	1	NA	NA	NA	NA	NA	NA	NA	NA
Q8BHC2	Ist1	IST1 homolog	NA	NA	NA	NA	NA	NA	NA	NA	1	1	NA	NA
Q8BI42	Hnrnpl	Uncharacterized protein	NA	NA	NA	NA	NA	NA	1	NA	NA	NA	NA	NA
Q8BIA9	Zfp954	Uncharacterized protein	NA	NA	NA	NA	NA	NA	NA	NA	NA	NA	NA	1
Q8BID7	Vmn2r57	Uncharacterized protein	NA	NA	NA	NA	NA	NA	NA	1	NA	NA	NA	NA
Q8BIM8	Myh9	Uncharacterized protein	NA	NA	NA	NA	NA	NA	5	NA	NA	1	NA	NA
Q8BJ10	Mylk	Uncharacterized protein	NA	NA	NA	NA	NA	NA	NA	NA	NA	1	NA	NA
Q8BJC1	Sema4d	Uncharacterized protein (Fragment)	NA	NA	NA	NA	NA	NA	NA	NA	NA	NA	1	NA
Q8BJC3	Ccbe1	EGF-like domain-containing protein	NA	NA	NA	NA	NA	NA	NA	NA	3	NA	NA	NA
Q8BJF6	Trappc12	Uncharacterized protein	NA	NA	NA	NA	NA	NA	NA	NA	1	NA	NA	NA
Q8BJQ7	Gldc	Glycine cleavage system P protein	NA	NA	NA	NA	NA	NA	NA	1	1	NA	NA	NA
Q8BJX0	Psmb2	Proteasome subunit beta	NA	NA	NA	NA	NA	NA	4	4	2	NA	NA	NA
Q8BJY7	Dars	Aspartyl-tRNA synthetase	NA	NA	NA	NA	NA	NA	NA	NA	NA	NA	1	NA
Q8BKF0	Tesk2	Protein kinase domain-containing protein	NA	NA	1	NA	NA	NA	NA	NA	NA	NA	NA	NA
Q8BKG8	Sema6d	Sema domain-containing protein	NA	NA	NA	NA	NA	NA	NA	NA	NA	1	NA	NA
Q8BKK2	Uncharacterized protein	Uncharacterized protein	NA	NA	NA	NA	NA	NA	NA	NA	NA	NA	NA	1
Q8BKY0	Cdk5r1	Cyclin-dependent kinase 5 activator	NA	NA	NA	NA	NA	NA	1	NA	NA	NA	NA	NA
Q8BL68	B230354O11Rik	Gag_p10 domain-containing protein	NA	NA	1	NA	NA	NA	1	1	NA	1	1	NA
Q8BLU9	Abi3bp	Uncharacterized protein (Fragment)	NA	NA	NA	NA	NA	NA	1	NA	NA	NA	NA	NA
Q8BLW0	Myh1	Uncharacterized protein (Fragment)	NA	NA	NA	NA	NA	NA	1	NA	NA	NA	NA	NA
Q8BMA4	Actin-related protein 2	Actin-related protein 2	NA	NA	NA	NA	NA	NA	NA	122	125	NA	NA	NA
Q8BMZ8	Uncharacterized protein	Uncharacterized protein	NA	NA	NA	NA	NA	NA	1	NA	1	NA	NA	NA
Q8BNF8	Vcp	Uncharacterized protein	NA	1	1	2	NA	NA	550	589	592	282	231	323
Q8BNH2	Prickle3	Prickle planar cell polarity protein 3	NA	NA	NA	NA	NA	NA	1	NA	NA	NA	NA	NA
Q8BP35	Actn4	Uncharacterized protein (Fragment)	NA	NA	NA	NA	NA	NA	NA	NA	NA	NA	NA	2
Q8BP79	Hccs	Cytochrome c heme lyase	1	NA	NA	NA	NA	NA	NA	NA	NA	NA	NA	NA
Q8BPI5	Il17rc	SEFIR domain-containing protein	NA	NA	NA	NA	NA	NA	NA	NA	NA	NA	1	NA
Q8BPI7	Adenosylhomocysteinase	Adenosylhomocysteinase (Fragment)	NA	NA	NA	NA	NA	NA	NA	61	44	NA	NA	NA
Q8BPL6	Rgs12	Uncharacterized protein	NA	NA	NA	NA	NA	NA	NA	NA	1	NA	NA	NA
Q8BPS5	Slc16a1	Monocarboxylate transporter 1	NA	NA	NA	NA	NA	NA	NA	NA	NA	NA	NA	1
Q8BPV9	Capn2	Calcium-activated neutral proteinase 2	NA	NA	NA	NA	NA	NA	NA	NA	30	NA	NA	NA
Q8BPW9	Dnpep	Aspartyl aminopeptidase	NA	NA	NA	NA	NA	NA	18	26	27	NA	NA	NA
Q8BQ03	Mcm5	DNA helicase	NA	NA	NA	NA	NA	NA	4	NA	NA	NA	NA	NA
Q8BR16	Ankrd12	Uncharacterized protein (Fragment)	NA	NA	NA	NA	NA	NA	NA	NA	NA	1	NA	NA
Q8BR75	Rsrc1	Serine/Arginine-related protein 53	NA	NA	NA	NA	NA	NA	NA	NA	NA	NA	1	NA
Q8BRG4	Enc1	BTB domain-containing protein	NA	NA	NA	NA	NA	NA	1	1	NA	NA	1	NA
Q8BRH7	Acap2	Uncharacterized protein (Fragment)	NA	NA	NA	NA	NA	NA	1	NA	NA	NA	NA	NA
Q8BRJ5	Ybx1	Uncharacterized protein (Fragment)	NA	NA	NA	NA	NA	NA	NA	NA	1	NA	NA	NA
Q8BRM5	Lingo2	Uncharacterized protein (Fragment)	NA	NA	NA	NA	NA	NA	NA	1	NA	NA	NA	NA
Q8BSC6	1700084E18Rik	Uncharacterized protein (Fragment)	NA	NA	NA	NA	NA	NA	NA	NA	NA	NA	NA	1
Q8BSI4	Gpc6	Uncharacterized protein	NA	NA	NA	NA	NA	NA	NA	1	NA	NA	NA	NA
Q8BSJ1	Uncharacterized protein	Uncharacterized protein	NA	NA	NA	NA	NA	NA	1	NA	NA	NA	NA	NA
Q8BT15	Lima1	LIM zinc-binding domain-containing protein	NA	NA	NA	NA	NA	NA	NA	2	NA	NA	NA	NA
Q8BT23	Hnrnpk	Heterogeneous nuclear ribonucleoprotein K	NA	NA	NA	NA	NA	NA	2	NA	10	NA	NA	NA
Q8BTF0	Copa	Coatomer subunit alpha	NA	NA	NA	NA	NA	NA	NA	12	7	NA	NA	2
Q8BTJ6	Osbpl1a	ANK_REP_REGION domain-containing protein	NA	NA	NA	NA	NA	NA	NA	NA	2	NA	NA	NA
Q8BTM6	Eif3i	Uncharacterized protein	NA	NA	NA	NA	NA	NA	1	NA	NA	1	NA	NA
Q8BTU5	Psma1	Proteasome subunit alpha type	NA	NA	NA	NA	NA	NA	NA	96	NA	16	8	26
Q8BTX6	Mtrex	Uncharacterized protein (Fragment)	NA	NA	NA	NA	NA	NA	NA	5	NA	NA	NA	NA
Q8BTY5	Psmb5	Proteasome subunit beta type-5	NA	NA	NA	NA	NA	NA	4	12	17	NA	1	2
Q8BU34	Psmd1	26S proteasome non-ATPase regulatory subunit 1 (Fragment)	NA	NA	NA	NA	NA	NA	10	14	25	NA	2	2
Q8BUX4	Ttn	Uncharacterized protein (Fragment)	NA	NA	NA	NA	NA	NA	NA	NA	NA	1	1	1
Q8BVD9	Aplf	FHA_2 domain-containing protein	1	NA	NA	NA	NA	NA	NA	NA	NA	NA	NA	NA
Q8BVE6	Ppp2r3a	Uncharacterized protein	NA	NA	NA	NA	NA	NA	NA	1	NA	NA	NA	NA
Q8BVG0	Frrs1l	DOMON domain-containing protein (Fragment)	NA	NA	NA	NA	NA	NA	NA	NA	NA	NA	NA	1
Q8BVK1	Helicase ATP-binding domain-containing protein	Helicase ATP-binding domain-containing protein	NA	NA	NA	NA	NA	NA	1	NA	1	NA	NA	NA
Q8BVK3	Uap1l1	Uncharacterized protein (Fragment)	NA	NA	NA	NA	NA	NA	2	NA	NA	NA	NA	NA
Q8BVQ9	Psmc2	26S proteasome AAA-ATPase subunit RPT1	NA	NA	NA	NA	NA	NA	24	NA	NA	NA	NA	NA
Q8BVT7	4921511C20Rik	RIKEN cDNA 4921511C20 gene	NA	NA	NA	NA	NA	NA	NA	1	NA	NA	NA	NA
Q8BVU7	Pgm5	Uncharacterized protein	NA	NA	NA	NA	NA	NA	1	NA	NA	NA	NA	NA
Q8BVW7	Pfas	Glutamine amidotransferase type-1 domain-containing protein (Fragment)	NA	NA	NA	NA	NA	NA	5	5	1	NA	NA	NA
Q8BVY8	Cct8	CCT-theta	NA	NA	NA	NA	NA	NA	NA	NA	NA	27	NA	NA
Q8BWE9	Cep95	Uncharacterized protein (Fragment)	NA	NA	NA	NA	NA	NA	NA	NA	NA	1	NA	NA
Q8BWI3	Myh10	Uncharacterized protein (Fragment)	NA	NA	NA	NA	NA	NA	1	NA	NA	NA	NA	NA
Q8BX18	Hps3	Uncharacterized protein	NA	NA	NA	NA	NA	NA	NA	1	NA	NA	NA	NA
Q8BXD2	1520401A03Rik	RIKEN cDNA 1520401A03 gene	NA	NA	NA	NA	NA	NA	NA	1	NA	NA	NA	NA
Q8BXF2	Myh10	Myosin-10	NA	NA	NA	NA	NA	NA	NA	4	NA	NA	NA	NA
Q8BXQ4	Ipo11	Importin N-terminal domain-containing protein	NA	NA	NA	NA	NA	NA	NA	1	NA	NA	NA	1
Q8BXX7	Mthfd1	C-1-tetrahydrofolate synthase, cytoplasmic	NA	NA	NA	NA	NA	NA	7	NA	NA	1	1	NA
Q8BXY4	Rab2a	Uncharacterized protein	NA	NA	NA	NA	NA	NA	NA	2	2	NA	NA	2
Q8BYD4	Slc35c1	Uncharacterized protein	NA	NA	NA	NA	NA	NA	NA	NA	1	NA	NA	NA
Q8BYG3	Ankrd35	ANK_REP_REGION domain-containing protein (Fragment)	NA	NA	NA	NA	NA	NA	NA	1	NA	NA	NA	NA
Q8BYH6	Snrnp200	Helicase ATP-binding domain-containing protein	NA	NA	NA	NA	NA	NA	NA	3	1	NA	NA	NA
Q8BYN6	Cul5	CULLIN_2 domain-containing protein (Fragment)	NA	NA	NA	NA	NA	NA	NA	1	NA	NA	NA	NA
Q8BYS1	Lgi2	Uncharacterized protein	NA	NA	NA	NA	NA	NA	NA	NA	NA	NA	NA	1
Q8C016	Vps16	Vacuolar protein sorting-associated protein 16 homolog	NA	NA	NA	NA	NA	NA	NA	1	NA	NA	NA	NA
Q8C020	Zfp407	C2H2-type domain-containing protein (Fragment)	NA	NA	NA	NA	NA	NA	NA	2	NA	NA	NA	NA
Q8C0A3	6330444E15Rik	Uncharacterized protein	NA	NA	NA	NA	NA	NA	NA	1	2	NA	NA	NA
Q8C1I9	Uncharacterized protein	Uncharacterized protein	NA	NA	NA	NA	NA	NA	1	NA	NA	NA	NA	NA
Q8C2I9	Mcm5	DNA helicase (Fragment)	NA	NA	NA	NA	NA	NA	NA	1	NA	NA	NA	NA
Q8C2J4	Bub1b	Protein kinase domain-containing protein (Fragment)	NA	NA	NA	NA	NA	NA	1	NA	NA	NA	NA	NA
Q8C2K0	Rpl12	60S ribosomal protein L12	NA	NA	NA	NA	NA	NA	NA	40	24	1	NA	NA
Q8C2N4	Rdx	FERM domain-containing protein (Fragment)	NA	NA	NA	NA	NA	NA	NA	1	NA	2	NA	NA
Q8C2N9	Msh6	DNA mismatch repair protein	NA	NA	1	NA	NA	NA	NA	NA	NA	NA	NA	NA
Q8C352	Ifngr2	Uncharacterized protein (Fragment)	1	NA	NA	NA	NA	NA	NA	NA	NA	NA	NA	NA
Q8C3K1	Prom1	Uncharacterized protein	NA	NA	NA	NA	NA	NA	NA	NA	NA	NA	NA	1
Q8C4G4	Arhgef4	Uncharacterized protein	NA	NA	NA	NA	NA	NA	NA	NA	NA	1	NA	NA
Q8C4V2	Gm6598	Uncharacterized protein	NA	NA	NA	NA	NA	NA	NA	NA	1	NA	NA	NA
Q8C4X0	A730071L15Rik	RIKEN cDNA A730071L15Rik gene (Fragment)	NA	NA	NA	NA	NA	NA	1	NA	NA	NA	NA	NA
Q8C553	Lmnb1	IF rod domain-containing protein (Fragment)	NA	NA	NA	NA	NA	NA	NA	1	NA	NA	NA	NA
Q8C5F4	Hmgcs1	3-hydroxy-3-methylglutaryl coenzyme A synthase	NA	NA	NA	NA	NA	NA	NA	1	NA	NA	NA	NA
Q8C5L1	Mcm6	DNA helicase (Fragment)	NA	NA	NA	NA	NA	NA	1	NA	NA	NA	NA	NA
Q8C5M5	Naa15	Uncharacterized protein	NA	NA	NA	NA	NA	NA	NA	NA	1	NA	NA	NA
Q8C6L4	Rtn3	Uncharacterized protein (Fragment)	NA	NA	NA	NA	NA	NA	NA	NA	2	NA	NA	NA
Q8C6T5	Dync1h1	Uncharacterized protein (Fragment)	NA	NA	NA	NA	NA	NA	NA	3	NA	NA	NA	2
Q8C771	Tmem131l	TMEM131_like domain-containing protein (Fragment)	NA	NA	NA	NA	NA	NA	NA	NA	NA	NA	NA	1
Q8C7E8	Uncharacterized protein	Uncharacterized protein (Fragment)	NA	NA	NA	NA	NA	NA	1	NA	NA	NA	NA	NA
Q8C7K2	Cyp2c38	Uncharacterized protein	NA	NA	NA	NA	NA	NA	NA	NA	1	NA	NA	2
Q8C8G3	Tmem135	Transmembrane protein 135	NA	NA	NA	NA	NA	NA	NA	NA	NA	NA	2	NA
Q8C8M9	Ttc5	Uncharacterized protein	NA	NA	NA	NA	NA	NA	1	NA	NA	NA	NA	NA
Q8C9L1	BC106179	BC106179 protein	NA	NA	NA	NA	NA	NA	NA	NA	NA	NA	NA	1
Q8C9M1	A630039F22Rik	Uncharacterized protein	1	NA	1	NA	NA	NA	NA	1	NA	NA	NA	NA
Q8CA01	Haus6	HAUS6_N domain-containing protein (Fragment)	NA	NA	NA	NA	NA	NA	1	NA	NA	NA	NA	NA
Q8CA90	Macroh2a1	Histone H2A	NA	NA	NA	NA	NA	NA	NA	1	3	NA	1	1
Q8CAF8	Gabbr1	G_PROTEIN_RECEP_F3_4 domain-containing protein (Fragment)	NA	NA	NA	NA	NA	NA	NA	NA	1	NA	NA	NA
Q8CB55	Nav1	AAA domain-containing protein	NA	NA	NA	NA	NA	NA	NA	1	NA	NA	NA	NA
Q8CC03	Ap1g1	GAE domain-containing protein (Fragment)	NA	NA	NA	NA	NA	NA	NA	NA	1	NA	NA	NA
Q8CC06	Itga6	Integrin_alpha2 domain-containing protein	NA	NA	NA	NA	NA	NA	NA	1	NA	NA	NA	NA
Q8CC23	Ptprd	Uncharacterized protein (Fragment)	NA	NA	NA	NA	NA	NA	NA	NA	NA	NA	1	NA
Q8CCR9	9130019P16Rik	Uncharacterized protein	NA	NA	NA	NA	NA	NA	NA	NA	1	NA	NA	NA
Q8CD51	Enpep	Aminopeptidase A (Fragment)	NA	NA	NA	NA	NA	1	NA	NA	NA	NA	NA	NA
Q8CD71	Zfp280b	C2H2-type domain-containing protein	NA	NA	NA	NA	NA	NA	NA	1	NA	NA	NA	NA
Q8CDE3	Gm5766	60S ribosomal protein L7a	NA	NA	NA	NA	NA	NA	NA	NA	NA	NA	NA	2
Q8CDW9	Calponin-homology (CH) domain-containing protein	Calponin-homology (CH) domain-containing protein	NA	1	NA	NA	NA	NA	NA	NA	NA	NA	NA	NA
Q8CE52	Mertk	Protein kinase domain-containing protein (Fragment)	NA	NA	NA	NA	NA	NA	NA	1	1	NA	NA	NA
Q8CEB5	Spata33	Uncharacterized protein	NA	NA	NA	NA	NA	NA	NA	NA	NA	NA	NA	1
Q8CEQ9	4932414N04Rik	RIKEN cDNA 4932414N04 gene	NA	NA	NA	NA	NA	NA	1	NA	NA	NA	NA	NA
Q8CEW9	Sf3b5	Splicing factor 3B subunit 5	NA	NA	NA	NA	NA	NA	NA	NA	2	NA	NA	NA
Q8CGB2	Thbs1	Thrombospondin 1	NA	NA	NA	2	NA	NA	754	802	664	148	139	220
Q8CGH5	Iqgap1	Iqgap1 protein (Fragment)	NA	NA	NA	NA	NA	NA	2	7	5	NA	NA	NA
Q8CGJ5	Smarca4	Smarca4 protein (Fragment)	NA	NA	NA	NA	NA	NA	1	NA	NA	NA	NA	NA
Q8CGT8	Ago4	Argonaute 4 protein	NA	NA	NA	NA	NA	NA	1	NA	NA	NA	NA	NA
Q8CHC0	Tbcd	MKIAA0988 protein (Fragment)	NA	NA	NA	NA	NA	NA	NA	2	NA	NA	NA	NA
Q8CHS9	Nup214	Nup214 protein	NA	NA	NA	NA	NA	NA	NA	1	2	NA	NA	NA
Q8CI06	Rnf213	Rnf213 protein (Fragment)	NA	NA	NA	NA	NA	NA	1	NA	NA	NA	NA	NA
Q8CIA8	Uaca	Uaca protein	NA	NA	NA	NA	NA	NA	NA	NA	1	NA	NA	1
Q8CIJ3	Eif3b	Eukaryotic translation initiation factor 3 subunit B	NA	NA	NA	NA	NA	NA	14	20	27	2	1	4
Q8CJA7	Mthfr	Methylenetetrahydrofolate reductase (NAD(P)H) (Fragment)	NA	NA	NA	NA	NA	NA	NA	NA	1	NA	NA	1
Q8JZT4	Gnai2	Gnai2 protein	NA	NA	NA	NA	NA	NA	1	NA	1	NA	NA	NA
Q8K0E9	Dhdh	Dhdh protein (Fragment)	NA	NA	NA	NA	NA	NA	NA	1	NA	NA	NA	NA
Q8K1I1	Lgals2	Galectin	NA	NA	NA	NA	NA	NA	NA	1	NA	NA	NA	NA
Q8K1K2	Psmc5	26S proteasome regulatory subunit 8	NA	NA	NA	NA	NA	NA	NA	NA	NA	2	NA	NA
Q8K2B7	Thbs2	Thbs2 protein (Fragment)	NA	NA	NA	NA	NA	NA	NA	NA	4	2	NA	NA
Q8K4E2	Cd226	CD226 antigen	NA	NA	NA	NA	NA	NA	1	NA	NA	NA	NA	NA
Q8K4V7	Cd300c2	Polymeric immunoglobulin receptor 5	NA	NA	NA	NA	NA	NA	3	NA	NA	NA	NA	NA
Q8QZS9	Psmc6	Psmc6 protein (Fragment)	NA	NA	NA	NA	NA	NA	1	NA	NA	3	NA	NA
Q8QZT6	Pcdh1	Pcdh1 protein (Fragment)	NA	NA	NA	NA	NA	NA	1	NA	NA	NA	NA	NA
Q8R038	Myg1	Melanocyte proliferating gene 1	NA	NA	NA	NA	NA	NA	NA	NA	2	NA	NA	NA
Q8R0F7	Kynu	Kynu protein	NA	NA	NA	NA	NA	NA	NA	1	NA	NA	NA	NA
Q8R0M1	Abi3bp	Abi3bp protein (Fragment)	NA	NA	NA	NA	NA	NA	NA	2	2	NA	NA	NA
Q8R0M2	Ugp2	UTP--glucose-1-phosphate uridylyltransferase (Fragment)	NA	NA	NA	NA	NA	NA	NA	1	NA	NA	NA	NA
Q8R0U4	Ube3b	Ube3b protein (Fragment)	NA	NA	NA	NA	NA	NA	NA	2	NA	NA	NA	NA
Q8R0U8	Xylb	Xylb protein (Fragment)	NA	NA	NA	NA	NA	NA	NA	1	NA	NA	NA	NA
Q8R1B2	Actr1b	Actr1b protein (Fragment)	NA	NA	NA	NA	NA	NA	NA	NA	NA	1	NA	NA
Q8R1H1	Nrd1	Nrd1 protein (Fragment)	NA	NA	NA	NA	NA	NA	2	NA	NA	NA	NA	NA
Q8R1N8	Eef1g	Eef1g protein	NA	NA	NA	NA	NA	NA	NA	NA	NA	3	2	NA
Q8R2W5	Kdm6a	Utx protein (Fragment)	NA	NA	NA	NA	NA	NA	NA	NA	1	NA	NA	NA
Q8R346	Aars	Aars protein (Fragment)	NA	NA	NA	NA	NA	NA	NA	NA	NA	NA	NA	2
Q8R3C7	Ddx19b	RNA helicase	NA	NA	NA	NA	NA	NA	NA	NA	1	NA	NA	NA
Q8R3M4	Atp1a1	Sodium/potassium-transporting ATPase subunit alpha (Fragment)	NA	NA	NA	2	3	NA	NA	NA	NA	NA	NA	NA
Q8R4A4	Cell cycle p34 CDC2 kinase protein	Cell cycle p34 CDC2 kinase protein (Fragment)	NA	NA	NA	NA	NA	NA	1	NA	NA	NA	NA	NA
Q8R539	Wdr6	WD-repeat protein p122	NA	NA	NA	NA	NA	NA	NA	1	NA	NA	NA	NA
Q8R582	Hnrnpf	Hnrpf protein (Fragment)	NA	NA	NA	NA	NA	NA	1	NA	NA	NA	NA	NA
Q8VC94	Rpl11	60S ribosomal protein L11	NA	NA	NA	NA	NA	NA	23	30	10	2	4	10
Q8VCK2	Ctsd	Ctsd protein (Fragment)	NA	NA	NA	NA	NA	NA	NA	NA	1	NA	NA	NA
Q8VCZ1	Alad	Porphobilinogen synthase	NA	NA	NA	NA	NA	NA	NA	58	NA	NA	NA	NA
Q8VDC3	aco1	Citrate hydro-lyase	NA	NA	NA	NA	NA	NA	NA	1	NA	NA	NA	NA
Q8VDD7	Phakinin, CP49	Phakinin, CP49 (Fragment)	NA	NA	NA	NA	NA	NA	NA	3	NA	NA	NA	NA
Q8VDS0	Pds5a	Pds5a protein	NA	NA	NA	NA	NA	NA	1	NA	NA	NA	NA	NA
Q8VED4	Ppp2cb	Serine/threonine-protein phosphatase	NA	NA	NA	NA	NA	NA	3	4	2	1	NA	2
Q8VEE3	Hist2h2bb	Hist2h2bb protein	NA	NA	NA	NA	NA	NA	NA	NA	NA	NA	NA	2
Q8VEI1	Cct6a	Cct6a protein	NA	NA	NA	1	NA	NA	NA	NA	NA	NA	NA	NA
Q8VEY4	Olfr135	Olfactory receptor	NA	NA	NA	NA	NA	NA	NA	2	2	NA	NA	2
Q8VFI9	Olfr872	Olfactory receptor	NA	NA	NA	NA	NA	NA	NA	NA	1	NA	NA	NA
Q8VGB4	Olfr985	Olfactory receptor	NA	NA	NA	NA	1	NA	NA	NA	NA	NA	NA	NA
Q8VGE1	Olfr1404	Olfactory receptor 1404	NA	NA	NA	NA	NA	NA	NA	NA	NA	NA	2	2
Q8VGX0	Olfr1389	Olfactory receptor	NA	NA	NA	NA	NA	NA	NA	NA	1	NA	NA	NA
Q8VH52	Eif3f	Translation initiation factor-3 subunit 5 (Fragment)	NA	NA	NA	NA	NA	NA	NA	3	2	NA	NA	1
Q8VHB3	Psmb3	Proteasome chain 13 (Fragment)	NA	NA	NA	NA	NA	NA	NA	3	2	NA	NA	NA
Q8VIJ9	MPG	3-methyladenine DNA glycosidase	NA	NA	NA	NA	NA	NA	1	NA	NA	NA	NA	NA
Q91VK0	Pcsk5	Pcsk5 protein	NA	NA	NA	NA	NA	NA	NA	1	NA	NA	NA	NA
Q91YT9	Pgd	6-phosphogluconate dehydrogenase, decarboxylating	NA	NA	NA	NA	NA	NA	NA	2	NA	NA	NA	NA
Q91ZE6	Sptbn4	Spectrin beta chain	NA	NA	NA	NA	NA	NA	NA	1	NA	NA	1	NA
Q91ZF4	Ctsq	Cathepsin Q	NA	NA	NA	NA	NA	NA	1	1	NA	NA	NA	NA
Q91ZI5	Myo1d	Myosin-1d (Fragment)	NA	NA	NA	NA	NA	NA	NA	NA	NA	NA	1	NA
Q91ZZ2	Rapgef1	Guanine nucleotide exchange factor	NA	NA	NA	NA	NA	NA	NA	1	NA	NA	NA	NA
Q921J0	Xpo1	Xpo1 protein	NA	NA	NA	NA	NA	NA	3	1	NA	NA	NA	NA
Q922B5	Ccdc130	Uncharacterized protein (Fragment)	NA	NA	NA	1	NA	NA	NA	NA	NA	NA	NA	NA
Q922F9	Rpl14-ps1	60S ribosomal protein L14 (Fragment)	NA	NA	NA	NA	NA	NA	NA	NA	NA	NA	NA	3
Q922G9	Copg2	Copg2 protein (Fragment)	NA	NA	NA	NA	NA	NA	1	NA	NA	NA	NA	NA
Q922J7	Ampd3	AMP deaminase (Fragment)	NA	NA	NA	NA	NA	NA	NA	NA	NA	NA	NA	1
Q922W7	2900073G15Rik	2900073G15Rik protein (Fragment)	NA	NA	NA	NA	NA	NA	NA	3	NA	NA	NA	2
Q925M0	Pcdhb4c	Protocadherin-betaI (Fragment)	NA	NA	NA	NA	NA	NA	1	NA	NA	NA	NA	NA
Q99KA2	Tuba1b	Tubulin alpha chain (Fragment)	NA	3	2	NA	NA	NA	131	128	99	68	73	59
Q99KC3	Nop2	Nop2 protein	NA	NA	NA	NA	NA	NA	1	NA	NA	NA	NA	NA
Q99KJ4	Tars	Threonyl-tRNA synthetase (Fragment)	NA	NA	NA	NA	NA	NA	NA	1	NA	NA	NA	NA
Q99KL3	Pabpc1	Polyadenylate-binding protein (Fragment)	NA	NA	NA	NA	NA	NA	1	NA	NA	NA	NA	NA
Q99KR1	Psmc5	Psmc5 protein (Fragment)	NA	NA	NA	NA	NA	NA	NA	13	12	NA	7	6
Q99LK5	Thop1	Thop1 protein	NA	NA	NA	NA	NA	NA	2	NA	3	NA	NA	1
Q99LW4	Col6a1	Col6a1 protein (Fragment)	NA	NA	NA	NA	NA	NA	1	NA	NA	NA	NA	NA
Q99M58	Gadd45g	Growth arrest and DNA-damage-inducible 45 gamma	NA	NA	NA	NA	NA	NA	NA	1	NA	NA	NA	NA
Q99MT5	Calpain	Calpain (Fragment)	NA	NA	NA	NA	NA	NA	NA	NA	1	NA	NA	NA
Q99N25	Rp13	Ribosomal protein L3 (Fragment)	NA	NA	NA	NA	NA	NA	NA	NA	NA	NA	11	NA
Q9CRG3	Sugt1	CS domain-containing protein (Fragment)	NA	NA	NA	NA	NA	NA	NA	1	NA	NA	NA	NA
Q9CRJ5	Rps8	40S ribosomal protein S8 (Fragment)	NA	NA	NA	3	NA	NA	NA	NA	1	NA	NA	NA
Q9CRL8	Gm10817	Uncharacterized protein (Fragment)	NA	NA	NA	NA	NA	NA	1	NA	NA	NA	NA	NA
Q9CRX6	Lamb1	Uncharacterized protein (Fragment)	NA	NA	NA	1	NA	NA	5	NA	NA	NA	NA	NA
Q9CS91	Tshz1	Uncharacterized protein	NA	NA	NA	NA	NA	NA	NA	NA	NA	NA	NA	1
Q9CSD9	Ddx5	Helicase C-terminal domain-containing protein (Fragment)	NA	NA	NA	NA	NA	NA	NA	2	1	NA	NA	NA
Q9CSM5	Rpl4	60S ribosomal protein L4	NA	1	NA	1	NA	NA	4	NA	NA	NA	1	5
Q9CSN9	Rps23	40S ribosomal protein S23 (Fragment)	NA	NA	NA	NA	NA	NA	NA	1	NA	NA	1	2
Q9CSU2	Psmd14	26S proteasome regulatory subunit RPN11 (Fragment)	NA	NA	NA	NA	NA	NA	NA	5	1	NA	NA	NA
Q9CT23	Eif3e	PCI domain-containing protein (Fragment)	NA	NA	NA	NA	NA	NA	1	5	NA	3	NA	7
Q9CT72	Farsa	AA_TRNA_LIGASE_II domain-containing protein (Fragment)	NA	NA	NA	NA	NA	NA	NA	1	NA	NA	NA	NA
Q9CTF6	Rras2	Uncharacterized protein (Fragment)	NA	NA	NA	NA	NA	NA	NA	NA	1	NA	NA	1
Q9CTI8	Atp6v1d	V-type proton ATPase subunit D (Fragment)	NA	NA	NA	NA	NA	NA	NA	NA	1	NA	NA	NA
Q9CTK7	Pik3cb	PI3K/PI4K domain-containing protein (Fragment)	NA	NA	NA	NA	NA	NA	NA	1	1	2	1	NA
Q9CU60	Oga	Uncharacterized protein (Fragment)	NA	NA	NA	NA	NA	NA	NA	NA	1	NA	NA	NA
Q9CUC5	A26c3	ANK_REP_REGION domain-containing protein (Fragment)	1	NA	NA	NA	NA	NA	NA	NA	NA	NA	NA	NA
Q9CUM4	Dnm2	Dynamin GTPase (Fragment)	NA	NA	NA	NA	NA	NA	1	NA	NA	NA	NA	NA
Q9CV24	Eif2s1	Uncharacterized protein (Fragment)	NA	NA	NA	NA	NA	NA	1	5	7	NA	NA	NA
Q9CV26	Eif3c	eIF-3c_N domain-containing protein (Fragment)	NA	NA	NA	NA	NA	NA	1	NA	NA	1	NA	NA
Q9CV72	Krt6b	IF rod domain-containing protein (Fragment)	NA	NA	NA	4	NA	NA	NA	NA	NA	1	NA	NA
Q9CVF1	Gip	Gastric inhibitory polypeptide (Fragment)	NA	NA	NA	NA	NA	NA	1	NA	NA	NA	NA	NA
Q9CVR0	Tubb4b	Tubulin beta chain (Fragment)	NA	NA	NA	NA	NA	NA	43	35	21	6	NA	17
Q9CVV0	Cux1	Protein CASP	NA	NA	NA	NA	NA	NA	NA	NA	NA	1	NA	NA
Q9CVV1	Chrne	Neur_chan_memb domain-containing protein (Fragment)	NA	NA	NA	NA	NA	NA	NA	NA	1	NA	NA	NA
Q9CW99	Mark3	UBA domain-containing protein (Fragment)	NA	NA	NA	NA	NA	NA	1	NA	NA	NA	NA	NA
Q9CWC9	Krt42	IF rod domain-containing protein	NA	NA	NA	1	NA	NA	NA	NA	NA	NA	NA	NA
Q9CWK0	Rpl14	60S ribosomal protein L14	NA	NA	NA	NA	NA	NA	NA	NA	NA	9	9	5
Q9CWT9	Aldh16a1	Aldedh domain-containing protein (Fragment)	NA	NA	NA	NA	NA	NA	NA	NA	2	NA	NA	NA
Q9CYG6	Ipo5	Uncharacterized protein	NA	NA	NA	NA	NA	NA	4	26	1	NA	NA	NA
Q9CZ46	Stmn2	Uncharacterized protein	NA	NA	NA	NA	NA	NA	NA	NA	1	NA	NA	NA
Q9D096	Isoc1	Isochorismatase domain-containing protein	NA	NA	NA	NA	NA	NA	1	NA	NA	NA	NA	NA
Q9D1H3	1110008E08Rik	Uncharacterized protein	NA	NA	NA	NA	NA	NA	NA	NA	1	NA	NA	NA
Q9D255	Pfkp	PFK domain-containing protein	NA	NA	NA	NA	NA	NA	NA	2	5	NA	NA	NA
Q9D3H5	Ppp1r18os	Uncharacterized protein	NA	NA	NA	NA	NA	NA	1	NA	NA	NA	1	NA
Q9D3I5	Hal	Uncharacterized protein	NA	NA	NA	NA	NA	NA	NA	NA	1	NA	NA	NA
Q9D466	4933411G06Rik	Small ubiquitin-related modifier	NA	NA	NA	NA	NA	NA	1	3	2	3	1	1
Q9D4G5	Pop1	Processing of precursor 1, ribonuclease P/MRP family, (S. cerevisiae)	NA	NA	NA	NA	NA	NA	2	1	NA	NA	NA	NA
Q9D5P1	Meikin	Uncharacterized protein	NA	NA	NA	NA	NA	NA	NA	NA	NA	NA	1	NA
Q9D605	Gm9859	Uncharacterized protein	NA	NA	NA	NA	NA	NA	NA	1	NA	NA	NA	NA
Q9D6E8	Sco2	Uncharacterized protein	NA	NA	NA	NA	NA	NA	NA	1	NA	NA	NA	NA
Q9D6G1	Hnrnpab	Uncharacterized protein	NA	NA	NA	NA	NA	NA	NA	1	NA	NA	NA	NA
Q9D743	Relch	Uncharacterized protein	NA	NA	NA	NA	NA	NA	NA	NA	NA	2	NA	NA
Q9D8S5	Srsf5	Serine/arginine-rich-splicing factor 5	NA	NA	NA	NA	NA	NA	NA	NA	NA	1	NA	1
Q9D971	1700128E19Rik	Uncharacterized protein	NA	NA	NA	NA	NA	NA	NA	NA	1	NA	NA	NA
Q9D9Y2	Uncharacterized protein	Uncharacterized protein	NA	NA	2	NA	NA	NA	NA	NA	NA	NA	NA	NA
Q9DAC5	1700013H16Rik	RIKEN cDNA 1700013H16 gene	NA	NA	NA	NA	NA	NA	NA	NA	NA	1	NA	NA
Q9DAN0	Iqcm	Uncharacterized protein	NA	NA	NA	NA	NA	NA	NA	NA	NA	1	NA	NA
Q9DBC9	Tha1	Threonine aldolase 1	NA	NA	NA	NA	NA	NA	1	NA	NA	NA	NA	NA
Q9DBT1	F13a1	WHEP-TRS domain-containing protein	NA	NA	NA	NA	NA	NA	NA	1	NA	NA	NA	NA
Q9DC49	Rps2	Uncharacterized protein	NA	NA	NA	NA	NA	NA	9	NA	NA	NA	NA	NA
Q9DCR1	Tubb4b	Uncharacterized protein (Fragment)	NA	NA	NA	NA	NA	NA	NA	102	NA	NA	23	NA
Q9DD05	Alad	Delta-aminolevulinic acid dehydratase	NA	NA	NA	NA	NA	NA	82	NA	61	NA	NA	NA
Q9ER90	Ercc6l2	Stretch responsive protein 278 (Fragment)	NA	NA	NA	NA	NA	NA	NA	1	1	NA	NA	NA
Q9JIC0	Zfp119a	KRAB zinc finger protein	NA	NA	NA	NA	NA	NA	NA	NA	1	NA	NA	NA
Q9JJ21	Gs alpha subunit	Gs alpha subunit (Fragment)	NA	NA	NA	NA	NA	NA	1	NA	NA	NA	NA	NA
Q9JK98	Clu	Clusterin	NA	NA	NA	1	NA	NA	NA	NA	NA	NA	NA	NA
Q9JL40	Abcb8	ATP-binding cassette protein (Fragment)	NA	NA	NA	NA	NA	NA	NA	1	NA	NA	NA	NA
Q9QXA3	Fat1	Fat 1 cadherin (Fragment)	NA	NA	NA	NA	NA	NA	19	13	27	21	4	23
Q9QXC6	Cryba1	Beta-A3/A1 crystallin protein	38	18	51	3	NA	NA	77	92	67	NA	NA	NA
Q9QXX5	Slc5a1	Sodium-glucose cotransporter 1	NA	NA	NA	NA	NA	NA	1	NA	NA	NA	NA	NA
Q9R2B2	Paka	Cdc42/Rac effector kinase (Fragment)	NA	NA	NA	NA	NA	NA	1	NA	NA	NA	NA	NA
Q9WUU4	Tnc	Fibronectin type III (Fragment)	NA	NA	NA	NA	NA	NA	2	1	NA	2	NA	NA
Q9WVE3	ESTM25	Uncharacterized protein (Fragment)	NA	NA	NA	NA	NA	NA	NA	1	NA	NA	NA	NA
Q9WVS5	Cctq	CCT-theta	NA	NA	NA	NA	NA	NA	118	150	126	35	34	80
Q9Z153	Nrd1	NRD convertase (Fragment)	NA	NA	NA	NA	NA	NA	NA	1	NA	NA	NA	NA
Q9Z2L2	Hspb1	Truncated hsp25 (Fragment)	NA	NA	NA	NA	NA	NA	NA	NA	NA	NA	NA	1
S0DHL8	Carmil2	Capping protein, Arp2/3 and myosin-I linker protein 2	NA	NA	NA	NA	NA	NA	NA	1	NA	NA	NA	NA
S4R1I7	Ppfia1	Protein tyrosine phosphatase, receptor type, f polypeptide (PTPRF),-interacting protein (liprin), alpha 1 (Fragment)	NA	NA	NA	NA	NA	NA	NA	NA	NA	NA	1	NA
S4R1I8	Sox14	Transcription factor SOX-14 (Fragment)	NA	NA	NA	NA	NA	NA	NA	1	2	NA	NA	1
S4R1J9	Ank2	Ankyrin-2 (Fragment)	NA	NA	NA	NA	NA	NA	1	NA	NA	NA	NA	NA
S4R1N1	Rplp0	60S acidic ribosomal protein P0 (Fragment)	NA	NA	NA	NA	NA	NA	NA	NA	49	NA	NA	NA
S4R1N6	Rps18	40S ribosomal protein S18	NA	NA	NA	NA	NA	NA	NA	NA	NA	NA	1	6
S4R204	Tmem150a	Transmembrane protein 150A	NA	1	NA	NA	NA	NA	NA	NA	NA	NA	NA	NA
S4R223	Rps19	40S ribosomal protein S19	NA	NA	NA	NA	NA	NA	1	NA	NA	1	NA	NA
S4R257	Gapdh	Glyceraldehyde-3-phosphate dehydrogenase (Fragment)	19	5	20	NA	NA	NA	147	NA	NA	NA	NA	NA
S4R2K3	Pcmtd1	Protein-L-isoaspartate O-methyltransferase domain-containing protein 1 (Fragment)	NA	NA	NA	NA	NA	NA	1	NA	NA	NA	NA	NA
S4R2M7	Pgk1	Phosphoglycerate kinase	NA	NA	NA	NA	NA	NA	4	9	7	1	NA	1
V9GWS0	Acaca	Acetyl-CoA carboxylase 1 (Fragment)	NA	NA	NA	NA	NA	NA	20	12	26	7	NA	3
V9GX23	Vps13d	Vacuolar protein sorting 13D (Fragment)	NA	NA	NA	NA	NA	NA	NA	NA	1	NA	NA	NA
V9GX39	Trps1	Zinc finger transcription factor Trps1 (Fragment)	NA	NA	NA	NA	NA	NA	NA	NA	1	NA	NA	NA
V9GX53	Erc1	ELKS/Rab6-interacting/CAST family member 1	NA	NA	NA	NA	NA	NA	1	NA	1	NA	NA	NA
V9GX81	Mroh6	Maestro heat-like repeat family member 6	NA	NA	NA	NA	NA	NA	NA	2	1	NA	NA	NA
V9GX86	Cpne1	Copine-1 (Fragment)	NA	NA	NA	NA	NA	NA	NA	2	NA	NA	NA	NA
V9GXM7	Mns1	Meiosis-specific nuclear structural protein 1 (Fragment)	NA	NA	NA	NA	NA	NA	NA	NA	NA	NA	1	3
V9GXY1	Acaca	Acetyl-CoA carboxylase 1 (Fragment)	NA	NA	NA	NA	NA	NA	2	2	NA	NA	NA	NA
V9H0U1	Sex-limited protein Slp(w7) beta-gamma chain	Sex-limited protein Slp(w7) beta-gamma chain (Fragment)	NA	NA	NA	NA	NA	NA	NA	NA	1	NA	NA	NA
W0TYI4	Tcp1	T-complex protein 1 (Fragment)	NA	NA	NA	2	NA	NA	19	8	5	15	24	14
W4VSN9	Rhox2d	Reproductive homeobox 2D	NA	NA	NA	NA	NA	NA	NA	NA	1	NA	NA	NA
W8QM43	Gapdh	Glyceraldehyde-3-phosphate dehydrogenase (Fragment)	NA	NA	NA	1	NA	NA	NA	NA	NA	NA	NA	NA
X5J5E8	IgG1 heavy chain VDJ region	IgG1 heavy chain VDJ region (Fragment)	NA	NA	NA	NA	NA	NA	1	2	2	NA	NA	NA
Z4YJE4	Obscn	Non-specific serine/threonine protein kinase	NA	NA	NA	NA	NA	NA	NA	NA	NA	NA	NA	1
Z4YJL9	Ift20	Intraflagellar transport protein 20 homolog (Fragment)	NA	NA	NA	NA	NA	NA	1	NA	NA	NA	NA	NA
Z4YK64	Dcaf17	DDB1- and CUL4-associated factor 17	NA	NA	NA	NA	NA	NA	NA	1	NA	NA	NA	NA
Z4YK85	Agrn	Agrin	NA	NA	NA	NA	NA	NA	NA	41	48	NA	NA	18
Z4YKL5	Gsdma3	Gasdermin-A3	NA	NA	NA	NA	NA	NA	1	NA	NA	NA	NA	NA
Z4YLI8	Cluh	Clustered mitochondria protein homolog	NA	NA	NA	NA	NA	NA	4	3	7	NA	NA	NA
Z4YM95	Nup85	Nuclear pore complex protein Nup85 (Fragment)	NA	NA	NA	NA	NA	NA	1	NA	NA	NA	NA	NA

## Sheet: Supp table S1B
No Oxidative Stress Protein List	Oxidative Stress Protein List	Overlap
A0A087WS56	A0A087WS56	Common
A0A0N4SVU1	A0A0N4SVU1	Common
A0A0R4J0V5	A0A0R4J0V5	Common
A0A0U1RNJ1	A0A0U1RNJ1	Common
A0A1L1SQA8	A0A1L1SQA8	Common
A0A2R8VHF9	A0A2R8VHF9	Common
A0A3Q4EGK3	A0A3Q4EGK3	Common
A0A494BB86	A0A494BB86	Common
A2A547	A2A547	Common
A2A9T1	A2A9T1	Common
A4FUS1	A4FUS1	Common
A6MDD3	A6MDD3	Common
B1AXW5	B1AXW5	Common
B1B0C7	B1B0C7	Common
B2CY77	B2CY77	Common
B2RRX1	B2RRX1	Common
B2RSN3	B2RSN3	Common
B9EHN0	B9EHN0	Common
B9EIU1	B9EIU1	Common
B9EKB0	B9EKB0	Common
D3YX34	D3YX34	Common
D3YYM6	D3YYM6	Common
E0CZA1	E0CZA1	Common
E9Q509	E9Q509	Common
E9QB02	E9QB02	Common
F2Z483	F2Z483	Common
F6ZSB7	F6ZSB7	Common
F7CJS8	F7CJS8	Common
F8VQJ3	F8VQJ3	Common
F8WIR1	F8WIR1	Common
I6L9G8	I6L9G8	Common
O70569	O70569	Common
Q05DU8	Q05DU8	Common
Q148T4	Q148T4	Common
Q14AA6	Q14AA6	Common
Q3TDU5	Q3TDU5	Common
Q3TF87	Q3TF87	Common
Q3TI05	Q3TI05	Common
Q3TI61	Q3TI61	Common
Q3TII0	Q3TII0	Common
Q3TII3	Q3TII3	Common
Q3TIZ0	Q3TIZ0	Common
Q3TQY2	Q3TQY2	Common
Q3TS50	Q3TS50	Common
Q3TW28	Q3TW28	Common
Q3TXF9	Q3TXF9	Common
Q3U1C2	Q3U1C2	Common
Q3U3D3	Q3U3D3	Common
Q3U6U7	Q3U6U7	Common
Q3UCL7	Q3UCL7	Common
Q3UDB1	Q3UDB1	Common
Q3UEA1	Q3UEA1	Common
Q3UEK3	Q3UEK3	Common
Q3UIH5	Q3UIH5	Common
Q3UMM1	Q3UMM1	Common
Q4VAG4	Q4VAG4	Common
Q52L53	Q52L53	Common
Q542I9	Q542I9	Common
Q542X7	Q542X7	Common
Q545F8	Q545F8	Common
Q549A5	Q549A5	Common
Q5BLK1	Q5BLK1	Common
Q5BLK2	Q5BLK2	Common
Q5M9J8	Q5M9J8	Common
Q5RKP3	Q5RKP3	Common
Q5SXR6	Q5SXR6	Common
Q6NXX7	Q6NXX7	Common
Q6ZQA1	Q6ZQA1	Common
Q71LX8	Q71LX8	Common
Q7TSZ3	Q7TSZ3	Common
Q80Y09	Q80Y09	Common
Q8BNF8	Q8BNF8	Common
Q8CGB2	Q8CGB2	Common
Q8CIJ3	Q8CIJ3	Common
Q8VC94	Q8VC94	Common
Q8VED4	Q8VED4	Common
Q99KA2	Q99KA2	Common
Q9CT23	Q9CT23	Common
Q9CVR0	Q9CVR0	Common
Q9D466	Q9D466	Common
Q9QXA3	Q9QXA3	Common
Q9WVS5	Q9WVS5	Common
S4R2M7	S4R2M7	Common
V9GWS0	V9GWS0	Common
W0TYI4	W0TYI4	Common
A0A068BGT0	F7AUV3	Not common
A0A087WPL5	G3UZW8	Not common
A0A0A0MQG2	E9PWL5	Not common
A0A0G2JG10	E9QPX1	Not common
A0A0J9YTY0	Q3UE86	Not common
A0A0J9YUC4	Q3UW40	Not common
A0A0R4J049	A0A1B0GRR3	Not common
A0A140LHA2	A0A0G2JGY8	Not common
A0A1B0GSF7	A0A2R8VHA9	Not common
A0A1B0GX25	I7HLV2	Not common
A0A1L1SSW7	Q9CWK0	Not common
A0A1L1SU37	A0A1B0GSQ6	Not common
A0A1W2P733	Q3UCH0	Not common
A0A1Y7VL71	Q3UJS0	Not common
A0A286YDT1	Q6PHZ1	Not common
A0A286YE28	Q8BTU5	Not common
A0A2I3BQ03	Q497E9	Not common
A0A2I3BQV5	Q3U5P8	Not common
A0A2I3BR78	Q497N1	Not common
A0A2R8VH97	Q3TUZ9	Not common
A0A2R8VK76		Not common
A0JLN0		Not common
A0JLV3		Not common
A1A4T2		Not common
A1BN54		Not common
A1E2B8		Not common
A2A5N1		Not common
A2A934		Not common
A2AGN7		Not common
A2AI76		Not common
A2AQE4		Not common
A2ATU9		Not common
A2CFB8		Not common
A2RTH4		Not common
A3KGU5		Not common
A3KML3		Not common
A3RLD4		Not common
B0LAC5		Not common
B1AT36		Not common
B2RRY4		Not common
B2RSV4		Not common
B2RT97		Not common
B2RUC7		Not common
B5APU1		Not common
B7FAV1		Not common
B7ZNJ1		Not common
D3Z1U1		Not common
D3Z6N3		Not common
D3Z7J9		Not common
D6RHA2		Not common
E0CXB1		Not common
E0CXE7		Not common
E0CZ27		Not common
E9PWF0		Not common
E9Q1T9		Not common
E9Q242		Not common
E9Q390		Not common
E9Q3W4		Not common
E9Q5B6		Not common
E9Q5F6		Not common
E9Q6V3		Not common
E9QP46		Not common
F6QTS1		Not common
F6T4M4		Not common
F7BTZ2		Not common
G3UWI5		Not common
G3UWL7		Not common
G3UX67		Not common
G3UY86		Not common
G3UZ34		Not common
G3X9T8		Not common
H3BKW9		Not common
H3BL60		Not common
J3QN38		Not common
J3QNW0		Not common
M1VB37		Not common
O89072		Not common
P97406		Not common
Q0P6I6		Not common
Q0QER9		Not common
Q3MIA8		Not common
Q3TAS8		Not common
Q3TAZ3		Not common
Q3TBQ1		Not common
Q3TCS0		Not common
Q3TEK2		Not common
Q3TFE8		Not common
Q3TGU7		Not common
Q3THA0		Not common
Q3THL2		Not common
Q3TIV6		Not common
Q3TKD0		Not common
Q3TLH6		Not common
Q3TLJ0		Not common
Q3TLL6		Not common
Q3TS44		Not common
Q3TU49		Not common
Q3TUK6		Not common
Q3TVC5		Not common
Q3TWM9		Not common
Q3TXT7		Not common
Q3TZ32		Not common
Q3U2G2		Not common
Q3U3A8		Not common
Q3U4U6		Not common
Q3U4W8		Not common
Q3U8N1		Not common
Q3U9N8		Not common
Q3UAD6		Not common
Q3UAZ3		Not common
Q3UBP6		Not common
Q3UDJ7		Not common
Q3UDZ8		Not common
Q3UHC8		Not common
Q3UHS6		Not common
Q3UIC3		Not common
Q3UIF3		Not common
Q3UJ70		Not common
Q3UJQ2		Not common
Q3ULG5		Not common
Q3ULJ5		Not common
Q3ULS8		Not common
Q3UPY3		Not common
Q3UQJ1		Not common
Q3UR88		Not common
Q3UWK7		Not common
Q3UWS7		Not common
Q3UX26		Not common
Q3UXJ8		Not common
Q4FE56		Not common
Q4FZK2		Not common
Q542J9		Not common
Q545F4		Not common
Q545N1		Not common
Q58E35		Not common
Q58E59		Not common
Q5BL09		Not common
Q5DTS8		Not common
Q5FW97		Not common
Q5FWB6		Not common
Q5FWB7		Not common
Q5U4C5		Not common
Q61667		Not common
Q64369		Not common
Q66JU1		Not common
Q6P3F6		Not common
Q6P9L9		Not common
Q7TMQ8		Not common
Q7TMT3		Not common
Q7TN23		Not common
Q7TNQ1		Not common
Q80U36		Not common
Q80U60		Not common
Q80UL3		Not common
Q80ZV2		Not common
Q8BJX0		Not common
Q8BMA4		Not common
Q8BPI7		Not common
Q8BPW9		Not common
Q8BT23		Not common
Q8BTF0		Not common
Q8BTY5		Not common
Q8BU34		Not common
Q8BVW7		Not common
Q8BXY4		Not common
Q8C2K0		Not common
Q8CGH5		Not common
Q8R0M1		Not common
Q8VEY4		Not common
Q8VH52		Not common
Q8VHB3		Not common
Q99KR1		Not common
Q99LK5		Not common
Q9CV24		Not common
Q9CYG6		Not common
Q9D255		Not common
Q9DD05		Not common
Q9WUU4		Not common
V9GXY1		Not common
X5J5E8		Not common
Z4YK85		Not common
Z4YLI8		Not common

## Sheet: Supp table S1C
Accession	Gene Symbol	logFC	P-value	Adjusted P-value
Q5BLK1	Rps6	2.95869	1.09234e-21	3.91879e-20
Q5RKP3	Rpl13	2.45101	4.60051e-12	1.46705e-10
A0A1L1SQA8	Rps25	2.2192	2.44405e-06	3.04974e-05
F7CJS8	Rps9	2.20827	1.39031e-10	3.62746e-09
Q545F8	Rps4x	1.92991	8.75675e-07	1.19676e-05
A2A547	Rpl19	1.89256	4.87126e-09	8.73782e-08
Q5BLK2	Rps20	1.7346	0.000328312	0.00254664
D3YYM6	Rps5	1.67398	0.00779828	0.0476193
O70569	rps14	1.44036	4.53266e-08	7.65219e-07
Q6ZQA1	mKIAA0533	1.21924	0.000112331	0.000948209
A2A9T1	Tbkbp1	1.09861	0.00450773	0.0294027
Q14AA6	1700009N14Rik	-1.00974	9.41514e-08	1.50119e-06
Q3UDB1	Cct7	-1.16605	2.64961e-06	3.16849e-05
B2CY77	Rpsa	-1.2136	2.26336e-05	0.000216528
Q8VC94	Rpl11	-1.37055	0.00133445	0.00957469
Q8CGB2	Thbs1	-1.47675	3.07775e-35	2.94438e-33
Q7TSZ3	Lars	-1.63413	2.24815e-09	4.86134e-08
Q3U3D3	Vars	-1.68451	1.94796e-31	1.11813e-29
A0A0R4J0V5	Polr2a	-1.71765	2.86057e-05	0.000256557
V9GWS0	Acaca	-1.75786	3.6798e-05	0.000320031
B9EIU1	Eprs	-1.87819	6.73465e-12	1.93285e-10
Q3TF87	Dars	-1.90542	1.00942e-05	0.000107298
A0A3Q4EGK3	Ltbp1	-2.07944	1.56951e-06	2.04749e-05
A0A0U1RNJ1	Fasn	-2.11101	1.94005e-34	1.39199e-32
Q8CIJ3	Eif3b	-2.16496	1.51495e-07	2.28837e-06
S4R2M7	Pgk1	-2.30259	0.00190423	0.0133296
Q3UEA1	Acly	-2.32239	2.17156e-05	0.00021491
Q71LX8	Hsp90ab1	-2.48128	1.9015e-93	5.45731e-91
F6ZSB7	Phgdh	-2.54273	6.28417e-10	1.50296e-08
B9EHN0	Uba1	-2.68459	1.28822e-35	1.84859e-33
A6MDD3	Cd109	-2.92674	4.91215e-06	5.42226e-05
Q549A5	Clu	-3.61327	2.69589e-09	5.15814e-08
Q3TUZ9	Gm10481	25.7452	0.998611	1
Q497N1	Rps26	24.9998	0.998652	1
A0A2R8VHA9	Apol7b	24.912	0.999506	1
Q3U5P8	Rps3a1	24.8674	0.998659	1
Q6PHZ1	Rpl17	23.8416	0.998714	1
Q497E9	Rps8	23.7889	0.997885	1
Q3UW40	Rpl24	23.6889	0.999225	1
A0A1B0GSQ6	Rpl13a	23.6052	0.998727	1
Q9CWK0	Rpl14	23.3395	0.998741	1
Q3UE86	Ganab	23.2834	0.999238	1
E9PWL5	Tfdp2	23.2834	0.999238	1
I7HLV2	Rpl10	23.2485	0.998746	1
Q8BTU5	Psma1	23.116	0.997945	1
Q3UJS0	Rpl8	22.8416	0.997969	1
Q3UCH0	Rpl6	22.8149	0.997971	1
A0A1B0GRR3	Rps11	22.7689	0.998772	1
E9QPX1	Col18a1	22.2834	0.998798	1
F7AUV3	Cep164	22.1499	0.998805	1
A0A0G2JGY8	Rpl34	21.843	0.998058	1
G3UZW8	Psmb8	21.1499	0.998119	1
A0A0N4SVU1	Gm7298	1.25276	0.0271295	0.144188
A4FUS1	Rps16	0.995428	0.0564189	0.287317
I6L9G8	Dtx3l	0.788457	0.161595	0.713505
F8VQJ3	Lamc1	0.733969	0.284444	1
Q5M9J8	Rpl28	0.693147	0.326975	1
Q3UCL7	Rps3	0.51425	9.05778e-23	3.71369e-21
Q9CT23	Eif3e	0.510826	0.595073	1
W0TYI4	Tcp1	0.504556	0.123645	0.554473
B9EKB0	Lamb1	0.470004	0.402089	1
Q3U1C2	Ruvbl1	0.451985	0.349883	1
A0A494BB86	Actr1a	0.235038	0.00721338	0.0450052
Q3UIH5	Psmc2	9.16124e-17	1	1
B1AXW5	Prdx1	0	1	1
Q3TDU5	Mfge8	-1.81302e-16	1	1
Q80Y09	Pdcd6ip	-0.0674413	0.881095	1
A0A087WS56	Fn1	-0.100156	0.513176	1
B1B0C7	Hspg2	-0.180488	0.527473	1
Q9D466	4933411G06Rik	-0.182322	0.763346	1
Q3TXF9	Atp1a1	-0.191055	0.791766	1
Q9QXA3	Fat1	-0.206336	0.602923	1
Q3UMM1	Tubb6	-0.276253	0.328534	1
D3YX34	Dctn1	-0.287682	0.69691	1
Q3TII0	Cct4	-0.313129	0.0174743	0.0970397
B2RRX1	Actb	-0.316209	2.40751e-05	0.000222888
Q5SXR6	Cltc	-0.374049	0.235296	1
B2RSN3	Tubb2b	-0.544727	3.05034e-06	3.50179e-05
Q3TS50	Hnrnpu	-0.559616	0.371953	1
Q99KA2	Tuba1b	-0.582216	2.37138e-09	4.86134e-08
Q3TIZ0	Tuba1c	-0.594891	3.30934e-07	4.74891e-06
Q8BNF8	Vcp	-0.727826	2.52089e-23	1.20582e-21
Q3TW28	Tpp2	-0.729961	0.0029053	0.0198529
Q3TQY2	Dctn4	-0.77319	0.117214	0.538383
Q3TII3	Eef1a1	-0.777705	0.000486615	0.00358099
Q3TI05	Cct6a	-0.788457	0.000318791	0.00254147
Q542X7	Cct2	-0.801628	0.00336143	0.0224356
F2Z483	Tcp1	-0.806476	0.0157422	0.0903605
E9Q509	Pklr	-0.828322	0.0175821	0.0970397
Q148T4	Tnc	-0.852387	0.000368814	0.00278552
E0CZA1	Cct5	-0.85745	0.00718235	0.0450052
Q3TI61	Psmd2	-0.903443	0.00020868	0.00171117
Q52L53	Psmc4	-0.916291	0.273443	1
Q9WVS5	Cctq	-0.972405	2.14394e-05	0.00021491
Q542I9	Psmc1	-0.97456	0.0156847	0.0903605
E9QB02	Mars1	-1.09861	0.0419042	0.218664
Q3UEK3	Eif3a	-1.09861	0.0570629	0.287317
Q8VED4	Ppp2cb	-1.09861	0.0993739	0.475338
F8WIR1	Ctsd	-1.09861	0.178465	0.776051
A0A2R8VHF9	Myh11	-1.20397	0.0674064	0.327892
Q4VAG4	Rpl22	-1.20397	0.109122	0.513409
Q3U6U7	Wars	-1.25276	0.118182	0.538383
Q9CVR0	Tubb4b	-1.45963	0.0179727	0.0973241
Q6NXX7	Abce1	-1.54045	0.0590727	0.292308
Q05DU8	Rrm1	-1.79176	0.0116788	0.0698295
Q80U36	Dync1h1	-20.5903	0.998169	1
Q3TAZ3	Dync1h1	-20.5903	0.998169	1
Q58E59	Sf3a3	-20.5903	0.998169	1
A0JLN0	Sf3b1	-20.8134	0.998149	1
E9QP46	Syne2	-20.8134	0.998149	1
Q7TMQ8	Trim47	-20.8134	0.998149	1
A0A286YE28	Tkt	-20.8134	0.998149	1
Q3TLJ0	Capza1	-20.8134	0.998149	1
Q99LK5	Thop1	-20.8134	0.998149	1
A0A1Y7VL71	Actr10	-20.8134	0.998149	1
Q6P3F6	Nfatc2	-20.8134	0.998149	1
Q8VH52	Eif3f	-20.8134	0.998149	1
Q8VHB3	Psmb3	-20.8134	0.998149	1
D6RHA2	Renbp	-20.8134	0.998149	1
Q80UL3	Galk1	-20.8134	0.998149	1
A2AQE4	Cops2	-20.9957	0.998133	1
B0LAC5	Atic	-20.9957	0.998133	1
A0A087WPL5	Dhx9	-20.9957	0.998133	1
F6QTS1	Cops4	-21.1499	0.998119	1
A0A2I3BQV5	Xpo7	-21.1499	0.998119	1
G3UWL7	H2az1	-21.1499	0.998119	1
Q3TUK6	Rngtt	-21.1499	0.998119	1
Q3UJ70	Hmgcs1	-21.1499	0.998119	1
Q545F4	Hspb1	-21.1499	0.998119	1
A2A5N1	Ywhab	-21.1499	0.998119	1
Q3UX26	Pak1ip1	-21.1499	0.998119	1
Q9D255	Pfkp	-21.1499	0.998119	1
E9Q6V3	Blmh	-21.1499	0.998119	1
A2ATU9	Hat1	-21.1499	0.998119	1
Q3TU49	Polr1a	-21.2485	0.996885	1
A2A934	Prdm16	-21.2834	0.998107	1
Q3UDZ8	Mta2	-21.2834	0.998107	1
A0A2R8VK76	Cpsf1	-21.2834	0.998107	1
Q7TN23	Ipo5	-21.2834	0.998107	1
Q0QER9	Idh1	-21.2834	0.998107	1
A0A1B0GSF7	Rpl18	-21.3026	0.998851	1
G3UWI5	Kmt2c	-21.3026	0.998851	1
Q9WUU4	Tnc	-21.3026	0.998851	1
A0A068BGT0	Vps52	-21.3026	0.998851	1
Q61667	Histone H4	-21.3026	0.998851	1
D3Z6N3	Mcm7	-21.3395	0.996872	1
A0A1W2P733	Mthfd1	-21.3395	0.996872	1
Q3U3A8	Capn2	-21.382	0.996865	1
A2CFB8	Gp1ba	-21.4012	0.998097	1
A2AI76	Klhl34	-21.4012	0.998097	1
Q3U8N1	Sars	-21.4012	0.998097	1
Q99KR1	Psmc5	-21.4228	0.996859	1
A0A0G2JG10	Dhx15	-21.4228	0.996859	1
Q3UAZ3	Rars	-21.4621	0.996854	1
Q3TVC5	Rars	-21.4998	0.996848	1
A0A2R8VH97	Eif3l	-21.5066	0.998088	1
Q5FWB7	Aldoa	-21.5066	0.998088	1
A2AGN7	Psmc3	-21.5362	0.996843	1
Q5DTS8	Mcm4	-21.5903	0.998836	1
A0A0J9YUC4	Myo1h	-21.5903	0.998836	1
Q3TKD0	Tnpo1	-21.5903	0.998836	1
V9GXY1	Acaca	-21.5903	0.998836	1
A0A286YDT1	Ttc37	-21.5903	0.998836	1
E0CXE7	Ctc1	-21.5903	0.998836	1
G3UY86	Pfas	-21.5903	0.998836	1
Q5BL09	Npm1	-21.5903	0.998836	1
Q8BXY4	Rab2a	-21.5903	0.998836	1
Q8R0M1	Abi3bp	-21.5903	0.998836	1
Q8VEY4	Olfr135	-21.5903	0.998836	1
Q542J9	Pcna	-21.6019	0.998079	1
Q7TMT3	Thbs2	-21.6052	0.996833	1
B2RT97	Psmd13	-21.6889	0.998071	1
F7BTZ2	Pml	-21.6889	0.998071	1
Q3TLL6	Eif4a1	-21.6889	0.998071	1
Q3TZ32	Aars	-21.7593	0.99681	1
Q9CV24	Eif2s1	-21.7689	0.998064	1
Q3ULJ5	Psmd3	-22.0372	0.99804	1
A0A2I3BQ03	Ywhaz	-22.0372	0.99804	1
Q3UWK7	Cacna1f	-22.0943	0.998035	1
A0JLV3	Hist1h2bj	-22.1484	0.998031	1
E9Q390	Myof	-22.1499	0.998805	1
J3QNW0	Dnmt1	-22.1499	0.998805	1
Q3ULS8	Ddb1	-22.1499	0.998805	1
Q3TAS8	Dpysl3	-22.1499	0.998805	1
Q545N1	C184	-22.3395	0.998014	1
B7FAV1	Flna	-22.3395	0.998014	1
E9PWF0	Thbs3	-22.4998	0.997999	1
A0A2I3BR78	Dis3	-22.5066	0.998786	1
B2RRY4	Mpp5	-22.5066	0.998786	1
Q3UXJ8	Flnc	-22.5066	0.998786	1
A0A0R4J049	Prmt5	-22.6019	0.998781	1
Q8BVW7	Pfas	-22.6019	0.998781	1
A0A140LHA2	Bub3	-22.638	0.997987	1
E0CZ27	H3f3a	-22.6889	0.998776	1
Q8BT23	Hnrnpk	-22.6889	0.998776	1
E9Q242	Adsl	-22.7005	0.997981	1
Q8BTY5	Psmb5	-22.7005	0.997981	1
A3KML3	Ywhaq	-22.8149	0.997971	1
Q8CGH5	Iqgap1	-22.843	0.998768	1
Q3TXT7	Ruvbl2	-22.843	0.998768	1
A0A0J9YTY0	Septin11	-22.843	0.998768	1
Z4YLI8	Cluh	-22.843	0.998768	1
G3UX67	Psmd11	-22.912	0.998764	1
Q3UQJ1	Vps35	-22.912	0.998764	1
Q3ULG5	Mcm6	-22.912	0.998764	1
A0A1L1SSW7	Fam214a	-22.9957	0.999248	1
Q3THA0	Eif3g	-22.9957	0.999248	1
Q3UR88	G3bp1	-22.9957	0.999248	1
G3X9T8	Cp	-23.0106	0.997954	1
Q8BU34	Psmd1	-23.0958	0.997946	1
Q8BTF0	Copa	-23.1484	0.998752	1
Q3THL2	Psma7	-23.1499	0.999243	1
F6T4M4	Srrm1	-23.1499	0.999243	1
B2RUC7	Strap	-23.1552	0.997941	1
O89072	Rps2	-23.1997	0.998749	1
Q3MIA8	Gps1	-23.2113	0.997936	1
Q3U4W8	Usp5	-23.247	0.997933	1
Q3TBQ1	Krt80	-23.2485	0.998746	1
Q58E35	Rplp1	-23.2834	0.999238	1
E9Q3W4	Plec	-23.3629	0.997923	1
Q7TNQ1	Copg1	-23.4228	0.998737	1
Q3UHC8	Acacb	-23.4621	0.998735	1
J3QN38	Gm21972	-23.4621	0.998735	1
A1A4T2	Ganab	-23.4621	0.998735	1
E0CXB1	Psma6	-23.4998	0.998733	1
Q8BJX0	Psmb2	-23.5066	0.999231	1
Q3UIC3	Ldha	-23.5066	0.999231	1
P97406	D17H6S56E-5	-23.5713	0.998729	1
E9Q5B6	Hnrnpd	-23.6019	0.999228	1
M1VB37	Mta1	-23.6019	0.999228	1
Q9CYG6	Ipo5	-23.638	0.998725	1
H3BL60	C3	-23.6699	0.997895	1
Q3TGU7	Pa2g4	-23.6889	0.999225	1
Q4FE56	Usp9x	-23.6889	0.999225	1
Q3TFE8	Kpnb1	-23.7991	0.997884	1
X5J5E8	IgG1 heavy chain VDJ region	-23.8134	0.999528	1
Q3TCS0	Prep	-23.9766	0.999216	1
A3KGU5	Sptan1	-24.0323	0.997863	1
Q0P6I6	Ccdc91	-24.1499	0.999521	1
D3Z7J9	Hspd1	-24.1743	0.998696	1
G3UZ34	Eftud2	-24.2113	0.998694	1
Q3UPY3	Crygs	-24.2644	0.998691	1
A0A1B0GX25	Hdac6	-24.2834	0.999518	1
Q3TWM9	Psap	-24.295	0.999205	1
Q3U9N8	Impdh2	-24.3395	0.999204	1
H3BKW9	C3	-24.3784	0.998685	1
Q3U2G2	Hspa4	-24.3969	0.997831	1
Q66JU1	Eif3c	-24.4087	0.998684	1
Q8BPW9	Dnpep	-24.4667	0.99868	1
A3RLD4	Crygc	-24.5734	0.998675	1
Q5U4C5	Ipo4	-24.6052	0.999195	1
Q3UAD6	Hsp90b1	-24.6067	0.997812	1
B2RSV4	Sf3b3	-24.6583	0.99867	1
Q3U4U6	Cct3	-24.6593	0.997807	1
A2RTH4	Cryge	-24.6699	0.998669	1
Q3TIV6	Kars	-24.6813	0.998669	1
Q6P9L9	Eef2	-24.8091	0.998662	1
E9Q5F6	Ubc	-24.8674	0.998659	1
Q3TLH6	Fabp5	-24.9766	0.999504	1
Q64369	Igf2bp3	-24.9957	0.999699	1
Q4FZK2	Eef1g	-25.363	0.998632	1
Q3TEK2	Hspa8	-25.7799	0.99861	1
Q3UHS6	Tln1	-25.8416	0.999487	1
Q3UDJ7	Actn4	-26.2854	0.99914	1
B5APU1	C3	-26.3688	0.999137	1
Q8BPI7	Adenosylhomocysteinase	-26.5704	0.999999	1
Q3UWS7	Iars	-26.6697	0.999679	1
B7ZNJ1	Fn1	-26.6886	0.998561	1
Q5FW97	EG433182	-26.7683	0.999469	1
A0A1L1SU37	Pkm	-26.8841	0.999121	1
A1BN54	Actn1	-26.9135	0.999466	1
Q3UIF3	Hsp90aa1	-27.1891	0.99872	1
Q9DD05	Alad	-27.2505	0.999481	1
Q3UJQ2	Hmgcs1	-27.6228	0.999668	1
Q80ZV2	Tubb5	-32.0893	0.999939	1
Q3UBP6	Actb	-37.5815	0.999989	1
A1E2B8	Inducible heat shock protein 70	-37.6953	0.999998	1
Q5FWB6	Rplp0	-37.6989	0.999997	1
Q8C2K0	Rpl12	-37.7762	0.999997	1
A0A0A0MQG2	Sptbn1	-39.8758	0.999999	1
Q3TS44	Psma1	-41.3336	0.999999	1
D3Z1U1	Crybb3	-42.9925	0.999999	1
B1AT36	Psmd12	-47.569	0.999999	1
E9Q1T9	Cse1l	-51.2613	0.999999	1
Z4YK85	Agrn	-65.2249	0.999999	1
Q8BMA4	Actin-related protein 2	-82.9971	0.999998	1
Q80U60	Pxdn	-88.815	0.999998	1

## Sheet: Supp table S1D
Direction	Source	GO term name	GO term_id	Adjusted_p_value	intersections
Up regulated	GO:MF	structural constituent of ribosome	GO:0003735	3.33e-10	Q5BLK1,A0A1L1SQA8,F7CJS8,A2A547,Q5BLK2,D3YYM6
Up regulated	GO:MF	structural molecule activity	GO:0005198	6.06e-07	Q5BLK1,A0A1L1SQA8,F7CJS8,A2A547,Q5BLK2,D3YYM6
Up regulated	GO:MF	5.8S rRNA binding	GO:1990932	8.5036e-05	F7CJS8,A2A547
Up regulated	GO:MF	RNA binding	GO:0003723	0.00224378	Q5BLK1,F7CJS8,A2A547,Q5BLK2,D3YYM6
Up regulated	GO:MF	rRNA binding	GO:0019843	0.0310257	F7CJS8,A2A547
Up regulated	GO:BP	translation	GO:0006412	0.00049562	Q5BLK1,F7CJS8,A2A547,Q5BLK2,D3YYM6
Up regulated	GO:BP	peptide biosynthetic process	GO:0043043	0.00057282	Q5BLK1,F7CJS8,A2A547,Q5BLK2,D3YYM6
Up regulated	GO:BP	amide biosynthetic process	GO:0043604	0.00130118	Q5BLK1,F7CJS8,A2A547,Q5BLK2,D3YYM6
Up regulated	GO:BP	peptide metabolic process	GO:0006518	0.00153041	Q5BLK1,F7CJS8,A2A547,Q5BLK2,D3YYM6
Up regulated	GO:BP	cellular amide metabolic process	GO:0043603	0.00599881	Q5BLK1,F7CJS8,A2A547,Q5BLK2,D3YYM6
Up regulated	GO:BP	regulation of translational fidelity	GO:0006450	0.019722	F7CJS8,D3YYM6
Up regulated	GO:BP	organonitrogen compound biosynthetic process	GO:1901566	0.0410675	Q5BLK1,F7CJS8,A2A547,Q5BLK2,D3YYM6
Up regulated	GO:CC	cytosolic ribosome	GO:0022626	2.57e-11	Q5BLK1,A0A1L1SQA8,F7CJS8,A2A547,Q5BLK2,D3YYM6
Up regulated	GO:CC	cytosolic small ribosomal subunit	GO:0022627	1.34e-10	Q5BLK1,A0A1L1SQA8,F7CJS8,Q5BLK2,D3YYM6
Up regulated	GO:CC	ribosomal subunit	GO:0044391	8.08e-10	Q5BLK1,A0A1L1SQA8,F7CJS8,A2A547,Q5BLK2,D3YYM6
Up regulated	GO:CC	small ribosomal subunit	GO:0015935	2.38e-09	Q5BLK1,A0A1L1SQA8,F7CJS8,Q5BLK2,D3YYM6
Up regulated	GO:CC	ribosome	GO:0005840	2.43e-09	Q5BLK1,A0A1L1SQA8,F7CJS8,A2A547,Q5BLK2,D3YYM6
Up regulated	GO:CC	ribonucleoprotein complex	GO:1990904	1.7491e-06	Q5BLK1,A0A1L1SQA8,F7CJS8,A2A547,Q5BLK2,D3YYM6
Up regulated	GO:CC	polysome	GO:0005844	0.00017945	Q5BLK1,A0A1L1SQA8,A2A547
Up regulated	GO:CC	nucleolus	GO:0005730	0.0155892	Q5BLK1,A0A1L1SQA8,F7CJS8,A2A547
Up regulated	GO:CC	cytosol	GO:0005829	0.0287137	Q5BLK1,A0A1L1SQA8,F7CJS8,A2A547,Q5BLK2,D3YYM6
Up regulated	KEGG	Ribosome	KEGG:03010	5.1e-09	Q5BLK1,A0A1L1SQA8,F7CJS8,A2A547,Q5BLK2,D3YYM6
Down regulated	GO:MF	nucleotide binding	GO:0000166	0.00100567	Q14AA6,Q7TSZ3,V9GWS0,A0A0U1RNJ1,S4R2M7,Q71LX8,F6ZSB7,B9EHN0
Down regulated	GO:MF	nucleoside phosphate binding	GO:1901265	0.00100567	Q14AA6,Q7TSZ3,V9GWS0,A0A0U1RNJ1,S4R2M7,Q71LX8,F6ZSB7,B9EHN0
Down regulated	GO:MF	small molecule binding	GO:0036094	0.00382662	Q14AA6,Q7TSZ3,V9GWS0,A0A0U1RNJ1,S4R2M7,Q71LX8,F6ZSB7,B9EHN0
Down regulated	GO:MF	amide binding	GO:0033218	0.00788503	V9GWS0,A0A0U1RNJ1,Q71LX8,Q549A5
Down regulated	GO:MF	tau protein binding	GO:0048156	0.0134748	Q71LX8,Q549A5
Down regulated	GO:MF	transforming growth factor beta binding	GO:0050431	0.0160896	A0A3Q4EGK3,A6MDD3
Down regulated	GO:MF	ligase activity	GO:0016874	0.0227059	Q7TSZ3,V9GWS0,B9EHN0
Down regulated	GO:BP	cellular response to chemical stimulus	GO:0070887	0.0056776	Q7TSZ3,A0A0R4J0V5,V9GWS0,A0A3Q4EGK3,A0A0U1RNJ1,S4R2M7,Q71LX8,A6MDD3,Q549A5
Down regulated	GO:BP	regulation of transforming growth factor beta activation	GO:1901388	0.00822017	A0A3Q4EGK3,Q71LX8
Down regulated	GO:BP	transforming growth factor beta activation	GO:0036363	0.0140829	A0A3Q4EGK3,Q71LX8
Down regulated	GO:BP	regulation of transforming growth factor beta receptor signaling pathway	GO:0017015	0.0394004	A0A3Q4EGK3,Q71LX8,A6MDD3
Down regulated	GO:BP	regulation of cellular response to transforming growth factor beta stimulus	GO:1903844	0.0415626	A0A3Q4EGK3,Q71LX8,A6MDD3
Down regulated	GO:CC	mitochondrion	GO:0005739	0.0249189	V9GWS0,A0A3Q4EGK3,A0A0U1RNJ1,Q71LX8,B9EHN0,Q549A5
Down regulated	GO:CC	cytosol	GO:0005829	0.0256884	Q7TSZ3,V9GWS0,A0A0U1RNJ1,S4R2M7,Q71LX8,B9EHN0,A6MDD3,Q549A5
Down regulated	KEGG	Fatty acid biosynthesis	KEGG:00061	0.0137342	V9GWS0,A0A0U1RNJ1
